# Supplementary material for: Insight into the PmrB structures of colistin-resistant Gram-negative bacteria through the multi-template ligand-guided homology modeling and in silico mutagenesis
Source: PeerJ. 2025 Sep 3;13:e19945. doi: 10.7717/peerj.19945 (PMC12422264; doi:10.7717/peerj.19945)
Supplement: Supplemental Information 9 — (A) Calculated DOPE score of all generated models using MODELLER software. (B) The binding energy (affinity) between the ATP and all generated models using AutodockFR. (C) MM/GBSA Binding Energy Terms for PmrB-ATP Complex across Multiple Organisms and Replicate Trajectories. (D) Per-residue energy decomposition analysis of PmrB-ATP interactions from MM/GBSA calculation. [file peerj-13-19945-s009.xlsx]

## Sheet: (A) DOPE_Score
(A) Calculated DOPE score of all generated models using MODELLER software
* The lower DOPE score indicate more favorable homology models
Organism	Template	Model_ID	DOPE Score
Acinetobacter_baumannii	4biw	model_0001	-28984.6
Acinetobacter_baumannii	4biw	model_0002	-28362.4
Acinetobacter_baumannii	4biw	model_0003	-28367.5
Acinetobacter_baumannii	4biw	model_0004	-28471.4
Acinetobacter_baumannii	4biw	model_0005	-28934.8
Acinetobacter_baumannii	4biw	model_0006	-28497.9
Acinetobacter_baumannii	4biw	model_0007	-28001.7
Acinetobacter_baumannii	4biw	model_0008	-28052.9
Acinetobacter_baumannii	4biw	model_0009	-28721.3
Acinetobacter_baumannii	4biw	model_0010	-28631.8
Acinetobacter_baumannii	4biw	model_0011	-28389.7
Acinetobacter_baumannii	4biw	model_0012	-28913.6
Acinetobacter_baumannii	4biw	model_0013	-27813.6
Acinetobacter_baumannii	4biw	model_0014	-28632.4
Acinetobacter_baumannii	4biw	model_0015	-28574.2
Acinetobacter_baumannii	4biw	model_0016	-28379.8
Acinetobacter_baumannii	4biw	model_0017	-28147.8
Acinetobacter_baumannii	4biw	model_0018	-27798.3
Acinetobacter_baumannii	4biw	model_0019	-28407.1
Acinetobacter_baumannii	4biw	model_0020	-28411.9
Acinetobacter_baumannii	4biw	model_0021	-28827
Acinetobacter_baumannii	4biw	model_0022	-28785.5
Acinetobacter_baumannii	4biw	model_0023	-28333
Acinetobacter_baumannii	4biw	model_0024	-28599.8
Acinetobacter_baumannii	4biw	model_0025	-28041.5
Acinetobacter_baumannii	4biw	model_0026	-28154.8
Acinetobacter_baumannii	4biw	model_0027	-28098.2
Acinetobacter_baumannii	4biw	model_0028	-28596.3
Acinetobacter_baumannii	4biw	model_0029	-29334.2
Acinetobacter_baumannii	4biw	model_0030	-28464.7
Acinetobacter_baumannii	4biw	model_0031	-28895.5
Acinetobacter_baumannii	4biw	model_0032	-28703
Acinetobacter_baumannii	4biw	model_0033	-28360.1
Acinetobacter_baumannii	4biw	model_0034	-28179.6
Acinetobacter_baumannii	4biw	model_0035	-28280.7
Acinetobacter_baumannii	4biw	model_0036	-28697
Acinetobacter_baumannii	4biw	model_0037	-28393.9
Acinetobacter_baumannii	4biw	model_0038	-27953.6
Acinetobacter_baumannii	4biw	model_0039	-28446
Acinetobacter_baumannii	4biw	model_0040	-28372.3
Acinetobacter_baumannii	4biw	model_0041	-28762.1
Acinetobacter_baumannii	4biw	model_0042	-28397.9
Acinetobacter_baumannii	4biw	model_0043	-28392.2
Acinetobacter_baumannii	4biw	model_0044	-28842.3
Acinetobacter_baumannii	4biw	model_0045	-28525.7
Acinetobacter_baumannii	4biw	model_0046	-28243.7
Acinetobacter_baumannii	4biw	model_0047	-28327
Acinetobacter_baumannii	4biw	model_0048	-28907.8
Acinetobacter_baumannii	4biw	model_0049	-28449.9
Acinetobacter_baumannii	4biw	model_0050	-28335.3
Acinetobacter_baumannii	4biw	model_0051	-28852.9
Acinetobacter_baumannii	4biw	model_0052	-28443.5
Acinetobacter_baumannii	4biw	model_0053	-28924.3
Acinetobacter_baumannii	4biw	model_0054	-28407.4
Acinetobacter_baumannii	4biw	model_0055	-29455.6
Acinetobacter_baumannii	4biw	model_0056	-28469.2
Acinetobacter_baumannii	4biw	model_0057	-28557.5
Acinetobacter_baumannii	4biw	model_0058	-28594.2
Acinetobacter_baumannii	4biw	model_0059	-28587.6
Acinetobacter_baumannii	4biw	model_0060	-28381.9
Acinetobacter_baumannii	4biw	model_0061	-28935.1
Acinetobacter_baumannii	4biw	model_0062	-28472.8
Acinetobacter_baumannii	4biw	model_0063	-28514.4
Acinetobacter_baumannii	4biw	model_0064	-28707
Acinetobacter_baumannii	4biw	model_0065	-28426.7
Acinetobacter_baumannii	4biw	model_0066	-28622.3
Acinetobacter_baumannii	4biw	model_0067	-28229.4
Acinetobacter_baumannii	4biw	model_0068	-28552.1
Acinetobacter_baumannii	4biw	model_0069	-28628.6
Acinetobacter_baumannii	4biw	model_0070	-28819
Acinetobacter_baumannii	4biw	model_0071	-27905.9
Acinetobacter_baumannii	4biw	model_0072	-27953.6
Acinetobacter_baumannii	4biw	model_0073	-28070.3
Acinetobacter_baumannii	4biw	model_0074	-28060.2
Acinetobacter_baumannii	4biw	model_0075	-28339.5
Acinetobacter_baumannii	4biw	model_0076	-28440.2
Acinetobacter_baumannii	4biw	model_0077	-28838.9
Acinetobacter_baumannii	4biw	model_0078	-28643.9
Acinetobacter_baumannii	4biw	model_0079	-28511.4
Acinetobacter_baumannii	4biw	model_0080	-28647.9
Acinetobacter_baumannii	4biw	model_0081	-28125.1
Acinetobacter_baumannii	4biw	model_0082	-28310.5
Acinetobacter_baumannii	4biw	model_0083	-28567.8
Acinetobacter_baumannii	4biw	model_0084	-28147.8
Acinetobacter_baumannii	4biw	model_0085	-28540.8
Acinetobacter_baumannii	4biw	model_0086	-28336.8
Acinetobacter_baumannii	4biw	model_0087	-28818.3
Acinetobacter_baumannii	4biw	model_0088	-28397.5
Acinetobacter_baumannii	4biw	model_0089	-28724.1
Acinetobacter_baumannii	4biw	model_0090	-28187.9
Acinetobacter_baumannii	4biw	model_0091	-28077.9
Acinetobacter_baumannii	4biw	model_0092	-28512.9
Acinetobacter_baumannii	4biw	model_0093	-29459.4
Acinetobacter_baumannii	4biw	model_0094	-29163
Acinetobacter_baumannii	4biw	model_0095	-28239.1
Acinetobacter_baumannii	4biw	model_0096	-28651
Acinetobacter_baumannii	4biw	model_0097	-27863.3
Acinetobacter_baumannii	4biw	model_0098	-28396.9
Acinetobacter_baumannii	4biw	model_0099	-28200.8
Acinetobacter_baumannii	4biw	model_0100	-28720.6
Acinetobacter_baumannii	4biw	model_0101	-28494.9
Acinetobacter_baumannii	4biw	model_0102	-28506.5
Acinetobacter_baumannii	4biw	model_0103	-27720.1
Acinetobacter_baumannii	4biw	model_0104	-28207.6
Acinetobacter_baumannii	4biw	model_0105	-28346.5
Acinetobacter_baumannii	4biw	model_0106	-27983.5
Acinetobacter_baumannii	4biw	model_0107	-28322.9
Acinetobacter_baumannii	4biw	model_0108	-28777.4
Acinetobacter_baumannii	4biw	model_0109	-28815.1
Acinetobacter_baumannii	4biw	model_0110	-28304.8
Acinetobacter_baumannii	4biw	model_0111	-28558.4
Acinetobacter_baumannii	4biw	model_0112	-28635.1
Acinetobacter_baumannii	4biw	model_0113	-27724.3
Acinetobacter_baumannii	4biw	model_0114	-28191
Acinetobacter_baumannii	4biw	model_0115	-27802.2
Acinetobacter_baumannii	4biw	model_0116	-28247.3
Acinetobacter_baumannii	4biw	model_0117	-28927
Acinetobacter_baumannii	4biw	model_0118	-28390.5
Acinetobacter_baumannii	4biw	model_0119	-28409.6
Acinetobacter_baumannii	4biw	model_0120	-28830.5
Acinetobacter_baumannii	4biw	model_0121	-28191.7
Acinetobacter_baumannii	4biw	model_0122	-28349.4
Acinetobacter_baumannii	4biw	model_0123	-28298.8
Acinetobacter_baumannii	4biw	model_0124	-28292.4
Acinetobacter_baumannii	4biw	model_0125	-28691.4
Acinetobacter_baumannii	4biw	model_0126	-27873.1
Acinetobacter_baumannii	4biw	model_0127	-28756.5
Acinetobacter_baumannii	4biw	model_0128	-28416.3
Acinetobacter_baumannii	4biw	model_0129	-28019
Acinetobacter_baumannii	4biw	model_0130	-28680.1
Acinetobacter_baumannii	4biw	model_0131	-28747.8
Acinetobacter_baumannii	4biw	model_0132	-29304.8
Acinetobacter_baumannii	4biw	model_0133	-28167.2
Acinetobacter_baumannii	4biw	model_0134	-28053.3
Acinetobacter_baumannii	4biw	model_0135	-28257.4
Acinetobacter_baumannii	4biw	model_0136	-28434.6
Acinetobacter_baumannii	4biw	model_0137	-28276.5
Acinetobacter_baumannii	4biw	model_0138	-28707.2
Acinetobacter_baumannii	4biw	model_0139	-28510.9
Acinetobacter_baumannii	4biw	model_0140	-28616.1
Acinetobacter_baumannii	4biw	model_0141	-28770.8
Acinetobacter_baumannii	4biw	model_0142	-28978.3
Acinetobacter_baumannii	4biw	model_0143	-28456
Acinetobacter_baumannii	4biw	model_0144	-28200.7
Acinetobacter_baumannii	4biw	model_0145	-28908
Acinetobacter_baumannii	4biw	model_0146	-28089.3
Acinetobacter_baumannii	4biw	model_0147	-28280.3
Acinetobacter_baumannii	4biw	model_0148	-28670
Acinetobacter_baumannii	4biw	model_0149	-28140.2
Acinetobacter_baumannii	4biw	model_0150	-28228.9
Acinetobacter_baumannii	4biw	model_0151	-28714.1
Acinetobacter_baumannii	4biw	model_0152	-28210.3
Acinetobacter_baumannii	4biw	model_0153	-27615.3
Acinetobacter_baumannii	4biw	model_0154	-29104.4
Acinetobacter_baumannii	4biw	model_0155	-28430.4
Acinetobacter_baumannii	4biw	model_0156	-28765.2
Acinetobacter_baumannii	4biw	model_0157	-28622
Acinetobacter_baumannii	4biw	model_0158	-28876.9
Acinetobacter_baumannii	4biw	model_0159	-28313.9
Acinetobacter_baumannii	4biw	model_0160	-28096.5
Acinetobacter_baumannii	4biw	model_0161	-27929
Acinetobacter_baumannii	4biw	model_0162	-28902.8
Acinetobacter_baumannii	4biw	model_0163	-28573.4
Acinetobacter_baumannii	4biw	model_0164	-28213.7
Acinetobacter_baumannii	4biw	model_0165	-28815
Acinetobacter_baumannii	4biw	model_0166	-28726.2
Acinetobacter_baumannii	4biw	model_0167	-28063.7
Acinetobacter_baumannii	4biw	model_0168	-28308.7
Acinetobacter_baumannii	4biw	model_0169	-28188.5
Acinetobacter_baumannii	4biw	model_0170	-28213.2
Acinetobacter_baumannii	4biw	model_0171	-29131.9
Acinetobacter_baumannii	4biw	model_0172	-28597.3
Acinetobacter_baumannii	4biw	model_0173	-28288.6
Acinetobacter_baumannii	4biw	model_0174	-28743.6
Acinetobacter_baumannii	4biw	model_0175	-28406.5
Acinetobacter_baumannii	4biw	model_0176	-28334.5
Acinetobacter_baumannii	4biw	model_0177	-28475.5
Acinetobacter_baumannii	4biw	model_0178	-27997
Acinetobacter_baumannii	4biw	model_0179	-27899
Acinetobacter_baumannii	4biw	model_0180	-28986.4
Acinetobacter_baumannii	4biw	model_0181	-28943.3
Acinetobacter_baumannii	4biw	model_0182	-29135.5
Acinetobacter_baumannii	4biw	model_0183	-28562.3
Acinetobacter_baumannii	4biw	model_0184	-28821.3
Acinetobacter_baumannii	4biw	model_0185	-28386.8
Acinetobacter_baumannii	4biw	model_0186	-28790.5
Acinetobacter_baumannii	4biw	model_0187	-28734.3
Acinetobacter_baumannii	4biw	model_0188	-28823.4
Acinetobacter_baumannii	4biw	model_0189	-28847.8
Acinetobacter_baumannii	4biw	model_0190	-28634.4
Acinetobacter_baumannii	4biw	model_0191	-28702.7
Acinetobacter_baumannii	4biw	model_0192	-28587.7
Acinetobacter_baumannii	4biw	model_0193	-28617.5
Acinetobacter_baumannii	4biw	model_0194	-28328.1
Acinetobacter_baumannii	4biw	model_0195	-28406.7
Acinetobacter_baumannii	4biw	model_0196	-28413.2
Acinetobacter_baumannii	4biw	model_0197	-28447.2
Acinetobacter_baumannii	4biw	model_0198	-28213.1
Acinetobacter_baumannii	4biw	model_0199	-28726.9
Acinetobacter_baumannii	4biw	model_0200	-28660
Acinetobacter_baumannii	4biw	model_0201	-28641.5
Acinetobacter_baumannii	4biw	model_0202	-28035.5
Acinetobacter_baumannii	4biw	model_0203	-28756.5
Acinetobacter_baumannii	4biw	model_0204	-28365.6
Acinetobacter_baumannii	4biw	model_0205	-28467.7
Acinetobacter_baumannii	4biw	model_0206	-28542
Acinetobacter_baumannii	4biw	model_0207	-28864
Acinetobacter_baumannii	4biw	model_0208	-28588.8
Acinetobacter_baumannii	4biw	model_0209	-28493
Acinetobacter_baumannii	4biw	model_0210	-27722.8
Acinetobacter_baumannii	4biw	model_0211	-28371.5
Acinetobacter_baumannii	4biw	model_0212	-28252.6
Acinetobacter_baumannii	4biw	model_0213	-28836.1
Acinetobacter_baumannii	4biw	model_0214	-28369.6
Acinetobacter_baumannii	4biw	model_0215	-28410.1
Acinetobacter_baumannii	4biw	model_0216	-28595.7
Acinetobacter_baumannii	4biw	model_0217	-28264.3
Acinetobacter_baumannii	4biw	model_0218	-28041.1
Acinetobacter_baumannii	4biw	model_0219	-29014.5
Acinetobacter_baumannii	4biw	model_0220	-28409.5
Acinetobacter_baumannii	4biw	model_0221	-28462.4
Acinetobacter_baumannii	4biw	model_0222	-28646.8
Acinetobacter_baumannii	4biw	model_0223	-27812
Acinetobacter_baumannii	4biw	model_0224	-28498.1
Acinetobacter_baumannii	4biw	model_0225	-28600.3
Acinetobacter_baumannii	4biw	model_0226	-28526.6
Acinetobacter_baumannii	4biw	model_0227	-28390.9
Acinetobacter_baumannii	4biw	model_0228	-28543.7
Acinetobacter_baumannii	4biw	model_0229	-28297.6
Acinetobacter_baumannii	4biw	model_0230	-29213.5
Acinetobacter_baumannii	4biw	model_0231	-28446.4
Acinetobacter_baumannii	4biw	model_0232	-28237
Acinetobacter_baumannii	4biw	model_0233	-28568.5
Acinetobacter_baumannii	4biw	model_0234	-28400.5
Acinetobacter_baumannii	4biw	model_0235	-28168.5
Acinetobacter_baumannii	4biw	model_0236	-28436.8
Acinetobacter_baumannii	4biw	model_0237	-28238.4
Acinetobacter_baumannii	4biw	model_0238	-28363.2
Acinetobacter_baumannii	4biw	model_0239	-27793.1
Acinetobacter_baumannii	4biw	model_0240	-28109.9
Acinetobacter_baumannii	4biw	model_0241	-28311.8
Acinetobacter_baumannii	4biw	model_0242	-28148.6
Acinetobacter_baumannii	4biw	model_0243	-28287.2
Acinetobacter_baumannii	4biw	model_0244	-28592.4
Acinetobacter_baumannii	4biw	model_0245	-28047.2
Acinetobacter_baumannii	4biw	model_0246	-27865.8
Acinetobacter_baumannii	4biw	model_0247	-28810.5
Acinetobacter_baumannii	4biw	model_0248	-28639.8
Acinetobacter_baumannii	4biw	model_0249	-28454.6
Acinetobacter_baumannii	4biw	model_0250	-28332.7
Acinetobacter_baumannii	4biw	model_0251	-28707.3
Acinetobacter_baumannii	4biw	model_0252	-28608.2
Acinetobacter_baumannii	4biw	model_0253	-28324.1
Acinetobacter_baumannii	4biw	model_0254	-28042.9
Acinetobacter_baumannii	4biw	model_0255	-28519.8
Acinetobacter_baumannii	4biw	model_0256	-28550.7
Acinetobacter_baumannii	4biw	model_0257	-29284.7
Acinetobacter_baumannii	4biw	model_0258	-27960
Acinetobacter_baumannii	4biw	model_0259	-28619.6
Acinetobacter_baumannii	4biw	model_0260	-28296.4
Acinetobacter_baumannii	4biw	model_0261	-27708.5
Acinetobacter_baumannii	4biw	model_0262	-28006.5
Acinetobacter_baumannii	4biw	model_0263	-28632.8
Acinetobacter_baumannii	4biw	model_0264	-28666.3
Acinetobacter_baumannii	4biw	model_0265	-28480.1
Acinetobacter_baumannii	4biw	model_0266	-28559
Acinetobacter_baumannii	4biw	model_0267	-28579.2
Acinetobacter_baumannii	4biw	model_0268	-28381.2
Acinetobacter_baumannii	4biw	model_0269	-29255.2
Acinetobacter_baumannii	4biw	model_0270	-28328.6
Acinetobacter_baumannii	4biw	model_0271	-28547.4
Acinetobacter_baumannii	4biw	model_0272	-28756.9
Acinetobacter_baumannii	4biw	model_0273	-28976.9
Acinetobacter_baumannii	4biw	model_0274	-28979
Acinetobacter_baumannii	4biw	model_0275	-28399.6
Acinetobacter_baumannii	4biw	model_0276	-28778
Acinetobacter_baumannii	4biw	model_0277	-28283.7
Acinetobacter_baumannii	4biw	model_0278	-28668
Acinetobacter_baumannii	4biw	model_0279	-28719.9
Acinetobacter_baumannii	4biw	model_0280	-28718.7
Acinetobacter_baumannii	4biw	model_0281	-28294.4
Acinetobacter_baumannii	4biw	model_0282	-28612.8
Acinetobacter_baumannii	4biw	model_0283	-28933.9
Acinetobacter_baumannii	4biw	model_0284	-28390.8
Acinetobacter_baumannii	4biw	model_0285	-28788.3
Acinetobacter_baumannii	4biw	model_0286	-28438.6
Acinetobacter_baumannii	4biw	model_0287	-28363
Acinetobacter_baumannii	4biw	model_0288	-28462
Acinetobacter_baumannii	4biw	model_0289	-28787
Acinetobacter_baumannii	4biw	model_0290	-28376.7
Acinetobacter_baumannii	4biw	model_0291	-27999.9
Acinetobacter_baumannii	4biw	model_0292	-27691.1
Acinetobacter_baumannii	4biw	model_0293	-28554
Acinetobacter_baumannii	4biw	model_0294	-28710.6
Acinetobacter_baumannii	4biw	model_0295	-28432.7
Acinetobacter_baumannii	4biw	model_0296	-28593.1
Acinetobacter_baumannii	4biw	model_0297	-28272.6
Acinetobacter_baumannii	4biw	model_0298	-28663.1
Acinetobacter_baumannii	4biw	model_0299	-28490.3
Acinetobacter_baumannii	4biw	model_0300	-28821.3
Acinetobacter_baumannii	4biw	model_0301	-28591
Acinetobacter_baumannii	4biw	model_0302	-28724.7
Acinetobacter_baumannii	4biw	model_0303	-28532.9
Acinetobacter_baumannii	4biw	model_0304	-28747.1
Acinetobacter_baumannii	4biw	model_0305	-28603.1
Acinetobacter_baumannii	4biw	model_0306	-28209.1
Acinetobacter_baumannii	4biw	model_0307	-28327.2
Acinetobacter_baumannii	4biw	model_0308	-28311.3
Acinetobacter_baumannii	4biw	model_0309	-28098.1
Acinetobacter_baumannii	4biw	model_0310	-27910.6
Acinetobacter_baumannii	4biw	model_0311	-28978.3
Acinetobacter_baumannii	4biw	model_0312	-28416.2
Acinetobacter_baumannii	4biw	model_0313	-28127.2
Acinetobacter_baumannii	4biw	model_0314	-28113.1
Acinetobacter_baumannii	4biw	model_0315	-28991.7
Acinetobacter_baumannii	4biw	model_0316	-28392.9
Acinetobacter_baumannii	4biw	model_0317	-29353.5
Acinetobacter_baumannii	4biw	model_0318	-28454.3
Acinetobacter_baumannii	4biw	model_0319	-28748.2
Acinetobacter_baumannii	4biw	model_0320	-28465.4
Acinetobacter_baumannii	4biw	model_0321	-28310
Acinetobacter_baumannii	4biw	model_0322	-27921.9
Acinetobacter_baumannii	4biw	model_0323	-28771.6
Acinetobacter_baumannii	4biw	model_0324	-28565.4
Acinetobacter_baumannii	4biw	model_0325	-29231.9
Acinetobacter_baumannii	4biw	model_0326	-28303.5
Acinetobacter_baumannii	4biw	model_0327	-28596.6
Acinetobacter_baumannii	4biw	model_0328	-28157.2
Acinetobacter_baumannii	4biw	model_0329	-28444.1
Acinetobacter_baumannii	4biw	model_0330	-28216.2
Acinetobacter_baumannii	4biw	model_0331	-28311.7
Acinetobacter_baumannii	4biw	model_0332	-28498.3
Acinetobacter_baumannii	4biw	model_0333	-28289.8
Acinetobacter_baumannii	4biw	model_0334	-28367.9
Acinetobacter_baumannii	4biw	model_0335	-28553.1
Acinetobacter_baumannii	4biw	model_0336	-27980.2
Acinetobacter_baumannii	4biw	model_0337	-28407.9
Acinetobacter_baumannii	4biw	model_0338	-27835.2
Acinetobacter_baumannii	4biw	model_0339	-28569.9
Acinetobacter_baumannii	4biw	model_0340	-28929.2
Acinetobacter_baumannii	4biw	model_0341	-28671.8
Acinetobacter_baumannii	4biw	model_0342	-28192.8
Acinetobacter_baumannii	4biw	model_0343	-28868.5
Acinetobacter_baumannii	4biw	model_0344	-28767.8
Acinetobacter_baumannii	4biw	model_0345	-28141.6
Acinetobacter_baumannii	4biw	model_0346	-27781.4
Acinetobacter_baumannii	4biw	model_0347	-28696
Acinetobacter_baumannii	4biw	model_0348	-28511
Acinetobacter_baumannii	4biw	model_0349	-28247
Acinetobacter_baumannii	4biw	model_0350	-28423
Acinetobacter_baumannii	4biw	model_0351	-28612.5
Acinetobacter_baumannii	4biw	model_0352	-28271.9
Acinetobacter_baumannii	4biw	model_0353	-28422.3
Acinetobacter_baumannii	4biw	model_0354	-28873.7
Acinetobacter_baumannii	4biw	model_0355	-28726.8
Acinetobacter_baumannii	4biw	model_0356	-28662.4
Acinetobacter_baumannii	4biw	model_0357	-28201.7
Acinetobacter_baumannii	4biw	model_0358	-28877.2
Acinetobacter_baumannii	4biw	model_0359	-28167.5
Acinetobacter_baumannii	4biw	model_0360	-28373.6
Acinetobacter_baumannii	4biw	model_0361	-28560.4
Acinetobacter_baumannii	4biw	model_0362	-28022.5
Acinetobacter_baumannii	4biw	model_0363	-28098.4
Acinetobacter_baumannii	4biw	model_0364	-28477
Acinetobacter_baumannii	4biw	model_0365	-29040.3
Acinetobacter_baumannii	4biw	model_0366	-29047.9
Acinetobacter_baumannii	4biw	model_0367	-28400.9
Acinetobacter_baumannii	4biw	model_0368	-28104.6
Acinetobacter_baumannii	4biw	model_0369	-27984.7
Acinetobacter_baumannii	4biw	model_0370	-28499.8
Acinetobacter_baumannii	4biw	model_0371	-28992.7
Acinetobacter_baumannii	4biw	model_0372	-28364.6
Acinetobacter_baumannii	4biw	model_0373	-28837.5
Acinetobacter_baumannii	4biw	model_0374	-28144.5
Acinetobacter_baumannii	4biw	model_0375	-28216.6
Acinetobacter_baumannii	4biw	model_0376	-28927.4
Acinetobacter_baumannii	4biw	model_0377	-28200.5
Acinetobacter_baumannii	4biw	model_0378	-28933.3
Acinetobacter_baumannii	4biw	model_0379	-28660.9
Acinetobacter_baumannii	4biw	model_0380	-28250.4
Acinetobacter_baumannii	4biw	model_0381	-28578.6
Acinetobacter_baumannii	4biw	model_0382	-28736.2
Acinetobacter_baumannii	4biw	model_0383	-28850.6
Acinetobacter_baumannii	4biw	model_0384	-28875.9
Acinetobacter_baumannii	4biw	model_0385	-28631
Acinetobacter_baumannii	4biw	model_0386	-28669.9
Acinetobacter_baumannii	4biw	model_0387	-28391.3
Acinetobacter_baumannii	4biw	model_0388	-28890.1
Acinetobacter_baumannii	4biw	model_0389	-28658.3
Acinetobacter_baumannii	4biw	model_0390	-28584.3
Acinetobacter_baumannii	4biw	model_0391	-28561
Acinetobacter_baumannii	4biw	model_0392	-28445.3
Acinetobacter_baumannii	4biw	model_0393	-28868.7
Acinetobacter_baumannii	4biw	model_0394	-28450.2
Acinetobacter_baumannii	4biw	model_0395	-28101.8
Acinetobacter_baumannii	4biw	model_0396	-28656.7
Acinetobacter_baumannii	4biw	model_0397	-28576.1
Acinetobacter_baumannii	4biw	model_0398	-28125
Acinetobacter_baumannii	4biw	model_0399	-28775.8
Acinetobacter_baumannii	4biw	model_0400	-28439.3
Acinetobacter_baumannii	4biw	model_0401	-28401.4
Acinetobacter_baumannii	4biw	model_0402	-28576.7
Acinetobacter_baumannii	4biw	model_0403	-28850.9
Acinetobacter_baumannii	4biw	model_0404	-28507.6
Acinetobacter_baumannii	4biw	model_0405	-28255.4
Acinetobacter_baumannii	4biw	model_0406	-28324.4
Acinetobacter_baumannii	4biw	model_0407	-28786.2
Acinetobacter_baumannii	4biw	model_0408	-28098.7
Acinetobacter_baumannii	4biw	model_0409	-27659.4
Acinetobacter_baumannii	4biw	model_0410	-28799.7
Acinetobacter_baumannii	4biw	model_0411	-27928.3
Acinetobacter_baumannii	4biw	model_0412	-28108.2
Acinetobacter_baumannii	4biw	model_0413	-28691.2
Acinetobacter_baumannii	4biw	model_0414	-28114.4
Acinetobacter_baumannii	4biw	model_0415	-28890.5
Acinetobacter_baumannii	4biw	model_0416	-28738.7
Acinetobacter_baumannii	4biw	model_0417	-28520.9
Acinetobacter_baumannii	4biw	model_0418	-28387.4
Acinetobacter_baumannii	4biw	model_0419	-28829
Acinetobacter_baumannii	4biw	model_0420	-28836
Acinetobacter_baumannii	4biw	model_0421	-28464.9
Acinetobacter_baumannii	4biw	model_0422	-28506.6
Acinetobacter_baumannii	4biw	model_0423	-28544.9
Acinetobacter_baumannii	4biw	model_0424	-28517.9
Acinetobacter_baumannii	4biw	model_0425	-28758.3
Acinetobacter_baumannii	4biw	model_0426	-28290.2
Acinetobacter_baumannii	4biw	model_0427	-27894.1
Acinetobacter_baumannii	4biw	model_0428	-28340.1
Acinetobacter_baumannii	4biw	model_0429	-28467.3
Acinetobacter_baumannii	4biw	model_0430	-28550.2
Acinetobacter_baumannii	4biw	model_0431	-28321.6
Acinetobacter_baumannii	4biw	model_0432	-28094.9
Acinetobacter_baumannii	4biw	model_0433	-28312.5
Acinetobacter_baumannii	4biw	model_0434	-28352.6
Acinetobacter_baumannii	4biw	model_0435	-28509.7
Acinetobacter_baumannii	4biw	model_0436	-28493.1
Acinetobacter_baumannii	4biw	model_0437	-28151
Acinetobacter_baumannii	4biw	model_0438	-28724.2
Acinetobacter_baumannii	4biw	model_0439	-29046.6
Acinetobacter_baumannii	4biw	model_0440	-28602.5
Acinetobacter_baumannii	4biw	model_0441	-28479.5
Acinetobacter_baumannii	4biw	model_0442	-29023.9
Acinetobacter_baumannii	4biw	model_0443	-29013
Acinetobacter_baumannii	4biw	model_0444	-28027
Acinetobacter_baumannii	4biw	model_0445	-28155.4
Acinetobacter_baumannii	4biw	model_0446	-28432.9
Acinetobacter_baumannii	4biw	model_0447	-28311.5
Acinetobacter_baumannii	4biw	model_0448	-28699.6
Acinetobacter_baumannii	4biw	model_0449	-28178.2
Acinetobacter_baumannii	4biw	model_0450	-28742.9
Acinetobacter_baumannii	4biw	model_0451	-28732
Acinetobacter_baumannii	4biw	model_0452	-28508
Acinetobacter_baumannii	4biw	model_0453	-28820.9
Acinetobacter_baumannii	4biw	model_0454	-27830.6
Acinetobacter_baumannii	4biw	model_0455	-28726.9
Acinetobacter_baumannii	4biw	model_0456	-28572.9
Acinetobacter_baumannii	4biw	model_0457	-28321.8
Acinetobacter_baumannii	4biw	model_0458	-28236
Acinetobacter_baumannii	4biw	model_0459	-28836.2
Acinetobacter_baumannii	4biw	model_0460	-27795.1
Acinetobacter_baumannii	4biw	model_0461	-27321.1
Acinetobacter_baumannii	4biw	model_0462	-28458.3
Acinetobacter_baumannii	4biw	model_0463	-28666
Acinetobacter_baumannii	4biw	model_0464	-28334.3
Acinetobacter_baumannii	4biw	model_0465	-28199.3
Acinetobacter_baumannii	4biw	model_0466	-28863.8
Acinetobacter_baumannii	4biw	model_0467	-29032.7
Acinetobacter_baumannii	4biw	model_0468	-28073.3
Acinetobacter_baumannii	4biw	model_0469	-28385.3
Acinetobacter_baumannii	4biw	model_0470	-28602.2
Acinetobacter_baumannii	4biw	model_0471	-29031
Acinetobacter_baumannii	4biw	model_0472	-28396.8
Acinetobacter_baumannii	4biw	model_0473	-28797.6
Acinetobacter_baumannii	4biw	model_0474	-28744.8
Acinetobacter_baumannii	4biw	model_0475	-28144.9
Acinetobacter_baumannii	4biw	model_0476	-28179.4
Acinetobacter_baumannii	4biw	model_0477	-28300.9
Acinetobacter_baumannii	4biw	model_0478	-28470.1
Acinetobacter_baumannii	4biw	model_0479	-28524.7
Acinetobacter_baumannii	4biw	model_0480	-28216.6
Acinetobacter_baumannii	4biw	model_0481	-28764.1
Acinetobacter_baumannii	4biw	model_0482	-28874.9
Acinetobacter_baumannii	4biw	model_0483	-29274.3
Acinetobacter_baumannii	4biw	model_0484	-28115.3
Acinetobacter_baumannii	4biw	model_0485	-29139.9
Acinetobacter_baumannii	4biw	model_0486	-28794.8
Acinetobacter_baumannii	4biw	model_0487	-27974
Acinetobacter_baumannii	4biw	model_0488	-28153
Acinetobacter_baumannii	4biw	model_0489	-28484.5
Acinetobacter_baumannii	4biw	model_0490	-28281
Acinetobacter_baumannii	4biw	model_0491	-27957.4
Acinetobacter_baumannii	4biw	model_0492	-28586.4
Acinetobacter_baumannii	4biw	model_0493	-28492.8
Acinetobacter_baumannii	4biw	model_0494	-28313.2
Acinetobacter_baumannii	4biw	model_0495	-28222.6
Acinetobacter_baumannii	4biw	model_0496	-28623.6
Acinetobacter_baumannii	4biw	model_0497	-28272.1
Acinetobacter_baumannii	4biw	model_0498	-28495.5
Acinetobacter_baumannii	4biw	model_0499	-28351.1
Acinetobacter_baumannii	4biw	model_0500	-28525.4
Acinetobacter_baumannii	4biw	model_0501	-28291.6
Acinetobacter_baumannii	4biw	model_0502	-27918.8
Acinetobacter_baumannii	4biw	model_0503	-28762.8
Acinetobacter_baumannii	4biw	model_0504	-28919.9
Acinetobacter_baumannii	4biw	model_0505	-28206.3
Acinetobacter_baumannii	4biw	model_0506	-28091.3
Acinetobacter_baumannii	4biw	model_0507	-28114.6
Acinetobacter_baumannii	4biw	model_0508	-28524.5
Acinetobacter_baumannii	4biw	model_0509	-28784
Acinetobacter_baumannii	4biw	model_0510	-28746.2
Acinetobacter_baumannii	4biw	model_0511	-28357.3
Acinetobacter_baumannii	4biw	model_0512	-28834.5
Acinetobacter_baumannii	4biw	model_0513	-28158.8
Acinetobacter_baumannii	4biw	model_0514	-28319.4
Acinetobacter_baumannii	4biw	model_0515	-28388.3
Acinetobacter_baumannii	4biw	model_0516	-27670
Acinetobacter_baumannii	4biw	model_0517	-28380.9
Acinetobacter_baumannii	4biw	model_0518	-28322.7
Acinetobacter_baumannii	4biw	model_0519	-28159.9
Acinetobacter_baumannii	4biw	model_0520	-28912.4
Acinetobacter_baumannii	4biw	model_0521	-28564.6
Acinetobacter_baumannii	4biw	model_0522	-28369.1
Acinetobacter_baumannii	4biw	model_0523	-28633.6
Acinetobacter_baumannii	4biw	model_0524	-28913.1
Acinetobacter_baumannii	4biw	model_0525	-28487.6
Acinetobacter_baumannii	4biw	model_0526	-28886.1
Acinetobacter_baumannii	4biw	model_0527	-28186
Acinetobacter_baumannii	4biw	model_0528	-28788.9
Acinetobacter_baumannii	4biw	model_0529	-28564.8
Acinetobacter_baumannii	4biw	model_0530	-28169.9
Acinetobacter_baumannii	4biw	model_0531	-28591.8
Acinetobacter_baumannii	4biw	model_0532	-28336.7
Acinetobacter_baumannii	4biw	model_0533	-28097.5
Acinetobacter_baumannii	4biw	model_0534	-28802.3
Acinetobacter_baumannii	4biw	model_0535	-28808.9
Acinetobacter_baumannii	4biw	model_0536	-28340.6
Acinetobacter_baumannii	4biw	model_0537	-28597
Acinetobacter_baumannii	4biw	model_0538	-28653.9
Acinetobacter_baumannii	4biw	model_0539	-28011.8
Acinetobacter_baumannii	4biw	model_0540	-28746
Acinetobacter_baumannii	4biw	model_0541	-29228
Acinetobacter_baumannii	4biw	model_0542	-28460.8
Acinetobacter_baumannii	4biw	model_0543	-28401.6
Acinetobacter_baumannii	4biw	model_0544	-28861.6
Acinetobacter_baumannii	4biw	model_0545	-28209.8
Acinetobacter_baumannii	4biw	model_0546	-28765.3
Acinetobacter_baumannii	4biw	model_0547	-28209.2
Acinetobacter_baumannii	4biw	model_0548	-28431
Acinetobacter_baumannii	4biw	model_0549	-28318.3
Acinetobacter_baumannii	4biw	model_0550	-28099.8
Acinetobacter_baumannii	4biw	model_0551	-28643.4
Acinetobacter_baumannii	4biw	model_0552	-28280.6
Acinetobacter_baumannii	4biw	model_0553	-28472.5
Acinetobacter_baumannii	4biw	model_0554	-27795
Acinetobacter_baumannii	4biw	model_0555	-29034.7
Acinetobacter_baumannii	4biw	model_0556	-27611.5
Acinetobacter_baumannii	4biw	model_0557	-29020.1
Acinetobacter_baumannii	4biw	model_0558	-28919.7
Acinetobacter_baumannii	4biw	model_0559	-28927.4
Acinetobacter_baumannii	4biw	model_0560	-27721
Acinetobacter_baumannii	4biw	model_0561	-28917.8
Acinetobacter_baumannii	4biw	model_0562	-28715.9
Acinetobacter_baumannii	4biw	model_0563	-28478.3
Acinetobacter_baumannii	4biw	model_0564	-28187.6
Acinetobacter_baumannii	4biw	model_0565	-27891.4
Acinetobacter_baumannii	4biw	model_0566	-28715
Acinetobacter_baumannii	4biw	model_0567	-28846.4
Acinetobacter_baumannii	4biw	model_0568	-27918.5
Acinetobacter_baumannii	4biw	model_0569	-28602
Acinetobacter_baumannii	4biw	model_0570	-28198.3
Acinetobacter_baumannii	4biw	model_0571	-28519.8
Acinetobacter_baumannii	4biw	model_0572	-28513.8
Acinetobacter_baumannii	4biw	model_0573	-27802
Acinetobacter_baumannii	4biw	model_0574	-28156.8
Acinetobacter_baumannii	4biw	model_0575	-28408.2
Acinetobacter_baumannii	4biw	model_0576	-28997.1
Acinetobacter_baumannii	4biw	model_0577	-28487.5
Acinetobacter_baumannii	4biw	model_0578	-28934.3
Acinetobacter_baumannii	4biw	model_0579	-28598.2
Acinetobacter_baumannii	4biw	model_0580	-28194.3
Acinetobacter_baumannii	4biw	model_0581	-28871.3
Acinetobacter_baumannii	4biw	model_0582	-28361.8
Acinetobacter_baumannii	4biw	model_0583	-28644
Acinetobacter_baumannii	4biw	model_0584	-29080.1
Acinetobacter_baumannii	4biw	model_0585	-28754.8
Acinetobacter_baumannii	4biw	model_0586	-28930
Acinetobacter_baumannii	4biw	model_0587	-29182.3
Acinetobacter_baumannii	4biw	model_0588	-28527
Acinetobacter_baumannii	4biw	model_0589	-27963.9
Acinetobacter_baumannii	4biw	model_0590	-27999.7
Acinetobacter_baumannii	4biw	model_0591	-28673.1
Acinetobacter_baumannii	4biw	model_0592	-28334.6
Acinetobacter_baumannii	4biw	model_0593	-28846.1
Acinetobacter_baumannii	4biw	model_0594	-28637.4
Acinetobacter_baumannii	4biw	model_0595	-28680.9
Acinetobacter_baumannii	4biw	model_0596	-28719.9
Acinetobacter_baumannii	4biw	model_0597	-28709.7
Acinetobacter_baumannii	4biw	model_0598	-28855
Acinetobacter_baumannii	4biw	model_0599	-28569
Acinetobacter_baumannii	4biw	model_0600	-28613.7
Acinetobacter_baumannii	4biw	model_0601	-28836.3
Acinetobacter_baumannii	4biw	model_0602	-28429.5
Acinetobacter_baumannii	4biw	model_0603	-28753.7
Acinetobacter_baumannii	4biw	model_0604	-27706.7
Acinetobacter_baumannii	4biw	model_0605	-28917.3
Acinetobacter_baumannii	4biw	model_0606	-28536.4
Acinetobacter_baumannii	4biw	model_0607	-28412.2
Acinetobacter_baumannii	4biw	model_0608	-28090.8
Acinetobacter_baumannii	4biw	model_0609	-28201.6
Acinetobacter_baumannii	4biw	model_0610	-28914.8
Acinetobacter_baumannii	4biw	model_0611	-29055.1
Acinetobacter_baumannii	4biw	model_0612	-28300.4
Acinetobacter_baumannii	4biw	model_0613	-28371.4
Acinetobacter_baumannii	4biw	model_0614	-28445.1
Acinetobacter_baumannii	4biw	model_0615	-28890.5
Acinetobacter_baumannii	4biw	model_0616	-28736.9
Acinetobacter_baumannii	4biw	model_0617	-28037
Acinetobacter_baumannii	4biw	model_0618	-28439.1
Acinetobacter_baumannii	4biw	model_0619	-28880.1
Acinetobacter_baumannii	4biw	model_0620	-28545
Acinetobacter_baumannii	4biw	model_0621	-29036.6
Acinetobacter_baumannii	4biw	model_0622	-28295.5
Acinetobacter_baumannii	4biw	model_0623	-28644.3
Acinetobacter_baumannii	4biw	model_0624	-28078.7
Acinetobacter_baumannii	4biw	model_0625	-28510.6
Acinetobacter_baumannii	4biw	model_0626	-28110.5
Acinetobacter_baumannii	4biw	model_0627	-28907.2
Acinetobacter_baumannii	4biw	model_0628	-28068.1
Acinetobacter_baumannii	4biw	model_0629	-28075.8
Acinetobacter_baumannii	4biw	model_0630	-28973.8
Acinetobacter_baumannii	4biw	model_0631	-28512.8
Acinetobacter_baumannii	4biw	model_0632	-28374.2
Acinetobacter_baumannii	4biw	model_0633	-28770.4
Acinetobacter_baumannii	4biw	model_0634	-28448
Acinetobacter_baumannii	4biw	model_0635	-28297.8
Acinetobacter_baumannii	4biw	model_0636	-29041.2
Acinetobacter_baumannii	4biw	model_0637	-28470
Acinetobacter_baumannii	4biw	model_0638	-28610.2
Acinetobacter_baumannii	4biw	model_0639	-28391.4
Acinetobacter_baumannii	4biw	model_0640	-28846.1
Acinetobacter_baumannii	4biw	model_0641	-28431.4
Acinetobacter_baumannii	4biw	model_0642	-27689.3
Acinetobacter_baumannii	4biw	model_0643	-28044.3
Acinetobacter_baumannii	4biw	model_0644	-28451.6
Acinetobacter_baumannii	4biw	model_0645	-28076.4
Acinetobacter_baumannii	4biw	model_0646	-28920.9
Acinetobacter_baumannii	4biw	model_0647	-28065.3
Acinetobacter_baumannii	4biw	model_0648	-28354.4
Acinetobacter_baumannii	4biw	model_0649	-28935.9
Acinetobacter_baumannii	4biw	model_0650	-28894.9
Acinetobacter_baumannii	4biw	model_0651	-28778
Acinetobacter_baumannii	4biw	model_0652	-28444.3
Acinetobacter_baumannii	4biw	model_0653	-28560.6
Acinetobacter_baumannii	4biw	model_0654	-28346.6
Acinetobacter_baumannii	4biw	model_0655	-28282.7
Acinetobacter_baumannii	4biw	model_0656	-28298.4
Acinetobacter_baumannii	4biw	model_0657	-28119.9
Acinetobacter_baumannii	4biw	model_0658	-28268.8
Acinetobacter_baumannii	4biw	model_0659	-28175.9
Acinetobacter_baumannii	4biw	model_0660	-28917.4
Acinetobacter_baumannii	4biw	model_0661	-28608.3
Acinetobacter_baumannii	4biw	model_0662	-28906.9
Acinetobacter_baumannii	4biw	model_0663	-28375.2
Acinetobacter_baumannii	4biw	model_0664	-28390.5
Acinetobacter_baumannii	4biw	model_0665	-28168.4
Acinetobacter_baumannii	4biw	model_0666	-28352.4
Acinetobacter_baumannii	4biw	model_0667	-28358.5
Acinetobacter_baumannii	4biw	model_0668	-28360.7
Acinetobacter_baumannii	4biw	model_0669	-29012.3
Acinetobacter_baumannii	4biw	model_0670	-28661.2
Acinetobacter_baumannii	4biw	model_0671	-27999.9
Acinetobacter_baumannii	4biw	model_0672	-28363.9
Acinetobacter_baumannii	4biw	model_0673	-28247.8
Acinetobacter_baumannii	4biw	model_0674	-28967.2
Acinetobacter_baumannii	4biw	model_0675	-27743.5
Acinetobacter_baumannii	4biw	model_0676	-28048
Acinetobacter_baumannii	4biw	model_0677	-29020.5
Acinetobacter_baumannii	4biw	model_0678	-28308.4
Acinetobacter_baumannii	4biw	model_0679	-28833.1
Acinetobacter_baumannii	4biw	model_0680	-27977.3
Acinetobacter_baumannii	4biw	model_0681	-28102.4
Acinetobacter_baumannii	4biw	model_0682	-28100.7
Acinetobacter_baumannii	4biw	model_0683	-28912.6
Acinetobacter_baumannii	4biw	model_0684	-28292.7
Acinetobacter_baumannii	4biw	model_0685	-28783.7
Acinetobacter_baumannii	4biw	model_0686	-28625.8
Acinetobacter_baumannii	4biw	model_0687	-28477.6
Acinetobacter_baumannii	4biw	model_0688	-28577.3
Acinetobacter_baumannii	4biw	model_0689	-28092.8
Acinetobacter_baumannii	4biw	model_0690	-28530.3
Acinetobacter_baumannii	4biw	model_0691	-28079
Acinetobacter_baumannii	4biw	model_0692	-28100.2
Acinetobacter_baumannii	4biw	model_0693	-28894
Acinetobacter_baumannii	4biw	model_0694	-27999.2
Acinetobacter_baumannii	4biw	model_0695	-28158.2
Acinetobacter_baumannii	4biw	model_0696	-28322.7
Acinetobacter_baumannii	4biw	model_0697	-28980.2
Acinetobacter_baumannii	4biw	model_0698	-28611.6
Acinetobacter_baumannii	4biw	model_0699	-28516.2
Acinetobacter_baumannii	4biw	model_0700	-28175.8
Acinetobacter_baumannii	4biw	model_0701	-28471.1
Acinetobacter_baumannii	4biw	model_0702	-28317.5
Acinetobacter_baumannii	4biw	model_0703	-28917.8
Acinetobacter_baumannii	4biw	model_0704	-28246.1
Acinetobacter_baumannii	4biw	model_0705	-28543
Acinetobacter_baumannii	4biw	model_0706	-28177.5
Acinetobacter_baumannii	4biw	model_0707	-28263
Acinetobacter_baumannii	4biw	model_0708	-28041.7
Acinetobacter_baumannii	4biw	model_0709	-28620.1
Acinetobacter_baumannii	4biw	model_0710	-28933.5
Acinetobacter_baumannii	4biw	model_0711	-28890.9
Acinetobacter_baumannii	4biw	model_0712	-28533.7
Acinetobacter_baumannii	4biw	model_0713	-28282.7
Acinetobacter_baumannii	4biw	model_0714	-28558.3
Acinetobacter_baumannii	4biw	model_0715	-28178.8
Acinetobacter_baumannii	4biw	model_0716	-28035.2
Acinetobacter_baumannii	4biw	model_0717	-27890.9
Acinetobacter_baumannii	4biw	model_0718	-28611.4
Acinetobacter_baumannii	4biw	model_0719	-29039.5
Acinetobacter_baumannii	4biw	model_0720	-28251.5
Acinetobacter_baumannii	4biw	model_0721	-28495.7
Acinetobacter_baumannii	4biw	model_0722	-27917.5
Acinetobacter_baumannii	4biw	model_0723	-28515.1
Acinetobacter_baumannii	4biw	model_0724	-28510.2
Acinetobacter_baumannii	4biw	model_0725	-28371.9
Acinetobacter_baumannii	4biw	model_0726	-28307.9
Acinetobacter_baumannii	4biw	model_0727	-28511.6
Acinetobacter_baumannii	4biw	model_0728	-28924
Acinetobacter_baumannii	4biw	model_0729	-28338.8
Acinetobacter_baumannii	4biw	model_0730	-27819.7
Acinetobacter_baumannii	4biw	model_0731	-28273.4
Acinetobacter_baumannii	4biw	model_0732	-28652.2
Acinetobacter_baumannii	4biw	model_0733	-28833.7
Acinetobacter_baumannii	4biw	model_0734	-28377.3
Acinetobacter_baumannii	4biw	model_0735	-28052.3
Acinetobacter_baumannii	4biw	model_0736	-28120.7
Acinetobacter_baumannii	4biw	model_0737	-27703.6
Acinetobacter_baumannii	4biw	model_0738	-28815.7
Acinetobacter_baumannii	4biw	model_0739	-28836.6
Acinetobacter_baumannii	4biw	model_0740	-28223.5
Acinetobacter_baumannii	4biw	model_0741	-28384.6
Acinetobacter_baumannii	4biw	model_0742	-28502.2
Acinetobacter_baumannii	4biw	model_0743	-29006.6
Acinetobacter_baumannii	4biw	model_0744	-28685.9
Acinetobacter_baumannii	4biw	model_0745	-28241.7
Acinetobacter_baumannii	4biw	model_0746	-27797.7
Acinetobacter_baumannii	4biw	model_0747	-28294.9
Acinetobacter_baumannii	4biw	model_0748	-28647.9
Acinetobacter_baumannii	4biw	model_0749	-27605.5
Acinetobacter_baumannii	4biw	model_0750	-28659.1
Acinetobacter_baumannii	4biw	model_0751	-28448
Acinetobacter_baumannii	4biw	model_0752	-28050.6
Acinetobacter_baumannii	4biw	model_0753	-28022.1
Acinetobacter_baumannii	4biw	model_0754	-28382.3
Acinetobacter_baumannii	4biw	model_0755	-28318.3
Acinetobacter_baumannii	4biw	model_0756	-29004.5
Acinetobacter_baumannii	4biw	model_0757	-28759.6
Acinetobacter_baumannii	4biw	model_0758	-28504.9
Acinetobacter_baumannii	4biw	model_0759	-28848.3
Acinetobacter_baumannii	4biw	model_0760	-28490
Acinetobacter_baumannii	4biw	model_0761	-27323.1
Acinetobacter_baumannii	4biw	model_0762	-28692.4
Acinetobacter_baumannii	4biw	model_0763	-28362.6
Acinetobacter_baumannii	4biw	model_0764	-28295.7
Acinetobacter_baumannii	4biw	model_0765	-28248
Acinetobacter_baumannii	4biw	model_0766	-28646.2
Acinetobacter_baumannii	4biw	model_0767	-28103.6
Acinetobacter_baumannii	4biw	model_0768	-28684.9
Acinetobacter_baumannii	4biw	model_0769	-28254.7
Acinetobacter_baumannii	4biw	model_0770	-28221.3
Acinetobacter_baumannii	4biw	model_0771	-28232.5
Acinetobacter_baumannii	4biw	model_0772	-28950.9
Acinetobacter_baumannii	4biw	model_0773	-28288.9
Acinetobacter_baumannii	4biw	model_0774	-28080.6
Acinetobacter_baumannii	4biw	model_0775	-28546.4
Acinetobacter_baumannii	4biw	model_0776	-28598.5
Acinetobacter_baumannii	4biw	model_0777	-29084.4
Acinetobacter_baumannii	4biw	model_0778	-28346.1
Acinetobacter_baumannii	4biw	model_0779	-28566.9
Acinetobacter_baumannii	4biw	model_0780	-28470.3
Acinetobacter_baumannii	4biw	model_0781	-28152.6
Acinetobacter_baumannii	4biw	model_0782	-28563.1
Acinetobacter_baumannii	4biw	model_0783	-29036.4
Acinetobacter_baumannii	4biw	model_0784	-28512.8
Acinetobacter_baumannii	4biw	model_0785	-28775.1
Acinetobacter_baumannii	4biw	model_0786	-28609.1
Acinetobacter_baumannii	4biw	model_0787	-28348.4
Acinetobacter_baumannii	4biw	model_0788	-28127
Acinetobacter_baumannii	4biw	model_0789	-28739.8
Acinetobacter_baumannii	4biw	model_0790	-28488.2
Acinetobacter_baumannii	4biw	model_0791	-28839.7
Acinetobacter_baumannii	4biw	model_0792	-28211
Acinetobacter_baumannii	4biw	model_0793	-28249.2
Acinetobacter_baumannii	4biw	model_0794	-28451.6
Acinetobacter_baumannii	4biw	model_0795	-28834.6
Acinetobacter_baumannii	4biw	model_0796	-28306.7
Acinetobacter_baumannii	4biw	model_0797	-29492.3
Acinetobacter_baumannii	4biw	model_0798	-28768.1
Acinetobacter_baumannii	4biw	model_0799	-28251
Acinetobacter_baumannii	4biw	model_0800	-28693.2
Acinetobacter_baumannii	4biw	model_0801	-28642.9
Acinetobacter_baumannii	4biw	model_0802	-28037.1
Acinetobacter_baumannii	4biw	model_0803	-28562.1
Acinetobacter_baumannii	4biw	model_0804	-28732.7
Acinetobacter_baumannii	4biw	model_0805	-28663.7
Acinetobacter_baumannii	4biw	model_0806	-29117
Acinetobacter_baumannii	4biw	model_0807	-28827.4
Acinetobacter_baumannii	4biw	model_0808	-28133.2
Acinetobacter_baumannii	4biw	model_0809	-28454.8
Acinetobacter_baumannii	4biw	model_0810	-28774.9
Acinetobacter_baumannii	4biw	model_0811	-28804
Acinetobacter_baumannii	4biw	model_0812	-28837.4
Acinetobacter_baumannii	4biw	model_0813	-28498.5
Acinetobacter_baumannii	4biw	model_0814	-28835.9
Acinetobacter_baumannii	4biw	model_0815	-28677.4
Acinetobacter_baumannii	4biw	model_0816	-28050.6
Acinetobacter_baumannii	4biw	model_0817	-28312.7
Acinetobacter_baumannii	4biw	model_0818	-28049.5
Acinetobacter_baumannii	4biw	model_0819	-28699.5
Acinetobacter_baumannii	4biw	model_0820	-28114.8
Acinetobacter_baumannii	4biw	model_0821	-28214.2
Acinetobacter_baumannii	4biw	model_0822	-28194.9
Acinetobacter_baumannii	4biw	model_0823	-28697.7
Acinetobacter_baumannii	4biw	model_0824	-28573.1
Acinetobacter_baumannii	4biw	model_0825	-28564.5
Acinetobacter_baumannii	4biw	model_0826	-28211
Acinetobacter_baumannii	4biw	model_0827	-28090
Acinetobacter_baumannii	4biw	model_0828	-28255.6
Acinetobacter_baumannii	4biw	model_0829	-28154
Acinetobacter_baumannii	4biw	model_0830	-29096.1
Acinetobacter_baumannii	4biw	model_0831	-28519.3
Acinetobacter_baumannii	4biw	model_0832	-27965.3
Acinetobacter_baumannii	4biw	model_0833	-27994.5
Acinetobacter_baumannii	4biw	model_0834	-28176.8
Acinetobacter_baumannii	4biw	model_0835	-28833.2
Acinetobacter_baumannii	4biw	model_0836	-28608.8
Acinetobacter_baumannii	4biw	model_0837	-28478.4
Acinetobacter_baumannii	4biw	model_0838	-28066.3
Acinetobacter_baumannii	4biw	model_0839	-28683
Acinetobacter_baumannii	4biw	model_0840	-28693.3
Acinetobacter_baumannii	4biw	model_0841	-28630
Acinetobacter_baumannii	4biw	model_0842	-28413.4
Acinetobacter_baumannii	4biw	model_0843	-28655.4
Acinetobacter_baumannii	4biw	model_0844	-28362.8
Acinetobacter_baumannii	4biw	model_0845	-28544.4
Acinetobacter_baumannii	4biw	model_0846	-28440.8
Acinetobacter_baumannii	4biw	model_0847	-28278.5
Acinetobacter_baumannii	4biw	model_0848	-28655.4
Acinetobacter_baumannii	4biw	model_0849	-27968.9
Acinetobacter_baumannii	4biw	model_0850	-28404.6
Acinetobacter_baumannii	4biw	model_0851	-28816.5
Acinetobacter_baumannii	4biw	model_0852	-28318.5
Acinetobacter_baumannii	4biw	model_0853	-28836
Acinetobacter_baumannii	4biw	model_0854	-28105.7
Acinetobacter_baumannii	4biw	model_0855	-28638.2
Acinetobacter_baumannii	4biw	model_0856	-28615
Acinetobacter_baumannii	4biw	model_0857	-28716.1
Acinetobacter_baumannii	4biw	model_0858	-28269.2
Acinetobacter_baumannii	4biw	model_0859	-28126.4
Acinetobacter_baumannii	4biw	model_0860	-28516.8
Acinetobacter_baumannii	4biw	model_0861	-28330
Acinetobacter_baumannii	4biw	model_0862	-28362.5
Acinetobacter_baumannii	4biw	model_0863	-28913.5
Acinetobacter_baumannii	4biw	model_0864	-28016
Acinetobacter_baumannii	4biw	model_0865	-28367.4
Acinetobacter_baumannii	4biw	model_0866	-28673.3
Acinetobacter_baumannii	4biw	model_0867	-28311.1
Acinetobacter_baumannii	4biw	model_0868	-28975.9
Acinetobacter_baumannii	4biw	model_0869	-28317.2
Acinetobacter_baumannii	4biw	model_0870	-28741.2
Acinetobacter_baumannii	4biw	model_0871	-28237.6
Acinetobacter_baumannii	4biw	model_0872	-28943.2
Acinetobacter_baumannii	4biw	model_0873	-28308.1
Acinetobacter_baumannii	4biw	model_0874	-28497.8
Acinetobacter_baumannii	4biw	model_0875	-28188
Acinetobacter_baumannii	4biw	model_0876	-28675.2
Acinetobacter_baumannii	4biw	model_0877	-28290.9
Acinetobacter_baumannii	4biw	model_0878	-28219.4
Acinetobacter_baumannii	4biw	model_0879	-27880.5
Acinetobacter_baumannii	4biw	model_0880	-28614.7
Acinetobacter_baumannii	4biw	model_0881	-28448.8
Acinetobacter_baumannii	4biw	model_0882	-28269.7
Acinetobacter_baumannii	4biw	model_0883	-28905.6
Acinetobacter_baumannii	4biw	model_0884	-28487.6
Acinetobacter_baumannii	4biw	model_0885	-28623
Acinetobacter_baumannii	4biw	model_0886	-28522.3
Acinetobacter_baumannii	4biw	model_0887	-28658.7
Acinetobacter_baumannii	4biw	model_0888	-28352.6
Acinetobacter_baumannii	4biw	model_0889	-28754.8
Acinetobacter_baumannii	4biw	model_0890	-28389.5
Acinetobacter_baumannii	4biw	model_0891	-28296.1
Acinetobacter_baumannii	4biw	model_0892	-28499.7
Acinetobacter_baumannii	4biw	model_0893	-29257.1
Acinetobacter_baumannii	4biw	model_0894	-28937.3
Acinetobacter_baumannii	4biw	model_0895	-28856.3
Acinetobacter_baumannii	4biw	model_0896	-29114.5
Acinetobacter_baumannii	4biw	model_0897	-28837.3
Acinetobacter_baumannii	4biw	model_0898	-28656.6
Acinetobacter_baumannii	4biw	model_0899	-28588.9
Acinetobacter_baumannii	4biw	model_0900	-28705
Acinetobacter_baumannii	4biw	model_0901	-27861.8
Acinetobacter_baumannii	4biw	model_0902	-28523.8
Acinetobacter_baumannii	4biw	model_0903	-28748.1
Acinetobacter_baumannii	4biw	model_0904	-28903.2
Acinetobacter_baumannii	4biw	model_0905	-28049.9
Acinetobacter_baumannii	4biw	model_0906	-28705
Acinetobacter_baumannii	4biw	model_0907	-28068
Acinetobacter_baumannii	4biw	model_0908	-28712.9
Acinetobacter_baumannii	4biw	model_0909	-27852
Acinetobacter_baumannii	4biw	model_0910	-28659.6
Acinetobacter_baumannii	4biw	model_0911	-28565.4
Acinetobacter_baumannii	4biw	model_0912	-28258.6
Acinetobacter_baumannii	4biw	model_0913	-28506.1
Acinetobacter_baumannii	4biw	model_0914	-28004.9
Acinetobacter_baumannii	4biw	model_0915	-28299
Acinetobacter_baumannii	4biw	model_0916	-28672.5
Acinetobacter_baumannii	4biw	model_0917	-27866.6
Acinetobacter_baumannii	4biw	model_0918	-28049.5
Acinetobacter_baumannii	4biw	model_0919	-28635.8
Acinetobacter_baumannii	4biw	model_0920	-28869.5
Acinetobacter_baumannii	4biw	model_0921	-28836.8
Acinetobacter_baumannii	4biw	model_0922	-28451.3
Acinetobacter_baumannii	4biw	model_0923	-28139.2
Acinetobacter_baumannii	4biw	model_0924	-28311.8
Acinetobacter_baumannii	4biw	model_0925	-28417.4
Acinetobacter_baumannii	4biw	model_0926	-28756.8
Acinetobacter_baumannii	4biw	model_0927	-28608.6
Acinetobacter_baumannii	4biw	model_0928	-28646.4
Acinetobacter_baumannii	4biw	model_0929	-28608.2
Acinetobacter_baumannii	4biw	model_0930	-28692.7
Acinetobacter_baumannii	4biw	model_0931	-28410.6
Acinetobacter_baumannii	4biw	model_0932	-28577
Acinetobacter_baumannii	4biw	model_0933	-28521.4
Acinetobacter_baumannii	4biw	model_0934	-28057.9
Acinetobacter_baumannii	4biw	model_0935	-28949.7
Acinetobacter_baumannii	4biw	model_0936	-28620.7
Acinetobacter_baumannii	4biw	model_0937	-28393.2
Acinetobacter_baumannii	4biw	model_0938	-27984.1
Acinetobacter_baumannii	4biw	model_0939	-28530.6
Acinetobacter_baumannii	4biw	model_0940	-28303.2
Acinetobacter_baumannii	4biw	model_0941	-28480
Acinetobacter_baumannii	4biw	model_0942	-27810.2
Acinetobacter_baumannii	4biw	model_0943	-28837.5
Acinetobacter_baumannii	4biw	model_0944	-28335.5
Acinetobacter_baumannii	4biw	model_0945	-29018.8
Acinetobacter_baumannii	4biw	model_0946	-28390.8
Acinetobacter_baumannii	4biw	model_0947	-28482.4
Acinetobacter_baumannii	4biw	model_0948	-28128
Acinetobacter_baumannii	4biw	model_0949	-28749.6
Acinetobacter_baumannii	4biw	model_0950	-28697.6
Acinetobacter_baumannii	4biw	model_0951	-27947.1
Acinetobacter_baumannii	4biw	model_0952	-28559
Acinetobacter_baumannii	4biw	model_0953	-29212.6
Acinetobacter_baumannii	4biw	model_0954	-28749.3
Acinetobacter_baumannii	4biw	model_0955	-28685.5
Acinetobacter_baumannii	4biw	model_0956	-28862.1
Acinetobacter_baumannii	4biw	model_0957	-28808.2
Acinetobacter_baumannii	4biw	model_0958	-28564.5
Acinetobacter_baumannii	4biw	model_0959	-28193.1
Acinetobacter_baumannii	4biw	model_0960	-28665.3
Acinetobacter_baumannii	4biw	model_0961	-28941.4
Acinetobacter_baumannii	4biw	model_0962	-28442.8
Acinetobacter_baumannii	4biw	model_0963	-28827.9
Acinetobacter_baumannii	4biw	model_0964	-28346.2
Acinetobacter_baumannii	4biw	model_0965	-29334.1
Acinetobacter_baumannii	4biw	model_0966	-28120.6
Acinetobacter_baumannii	4biw	model_0967	-28793.9
Acinetobacter_baumannii	4biw	model_0968	-28148.8
Acinetobacter_baumannii	4biw	model_0969	-28685.2
Acinetobacter_baumannii	4biw	model_0970	-28664.5
Acinetobacter_baumannii	4biw	model_0971	-28632.3
Acinetobacter_baumannii	4biw	model_0972	-28413.8
Acinetobacter_baumannii	4biw	model_0973	-28354.9
Acinetobacter_baumannii	4biw	model_0974	-28548.2
Acinetobacter_baumannii	4biw	model_0975	-28843.2
Acinetobacter_baumannii	4biw	model_0976	-28707.1
Acinetobacter_baumannii	4biw	model_0977	-28478.6
Acinetobacter_baumannii	4biw	model_0978	-28446.6
Acinetobacter_baumannii	4biw	model_0979	-28786.8
Acinetobacter_baumannii	4biw	model_0980	-28129.9
Acinetobacter_baumannii	4biw	model_0981	-27999.3
Acinetobacter_baumannii	4biw	model_0982	-28974.6
Acinetobacter_baumannii	4biw	model_0983	-28766.2
Acinetobacter_baumannii	4biw	model_0984	-28800.1
Acinetobacter_baumannii	4biw	model_0985	-28655.9
Acinetobacter_baumannii	4biw	model_0986	-28188.7
Acinetobacter_baumannii	4biw	model_0987	-29153.1
Acinetobacter_baumannii	4biw	model_0988	-28692.3
Acinetobacter_baumannii	4biw	model_0989	-28579.6
Acinetobacter_baumannii	4biw	model_0990	-28308.3
Acinetobacter_baumannii	4biw	model_0991	-27784.5
Acinetobacter_baumannii	4biw	model_0992	-27745
Acinetobacter_baumannii	4biw	model_0993	-28317.3
Acinetobacter_baumannii	4biw	model_0994	-29148.7
Acinetobacter_baumannii	4biw	model_0995	-28213.4
Acinetobacter_baumannii	4biw	model_0996	-28637
Acinetobacter_baumannii	4biw	model_0997	-28518.3
Acinetobacter_baumannii	4biw	model_0998	-28267.7
Acinetobacter_baumannii	4biw	model_0999	-28688.6
Acinetobacter_baumannii	4biw	model_1000	-28099.8
Acinetobacter_baumannii	af	model_0001	-47648.3
Acinetobacter_baumannii	af	model_0002	-48744.5
Acinetobacter_baumannii	af	model_0003	-48545.2
Acinetobacter_baumannii	af	model_0004	-48352.9
Acinetobacter_baumannii	af	model_0005	-48348.1
Acinetobacter_baumannii	af	model_0006	-48350.9
Acinetobacter_baumannii	af	model_0007	-48624.2
Acinetobacter_baumannii	af	model_0008	-48843.9
Acinetobacter_baumannii	af	model_0009	-48491
Acinetobacter_baumannii	af	model_0010	-48757.7
Acinetobacter_baumannii	af	model_0011	-48433.2
Acinetobacter_baumannii	af	model_0012	-48401.1
Acinetobacter_baumannii	af	model_0013	-48136.3
Acinetobacter_baumannii	af	model_0014	-48177.7
Acinetobacter_baumannii	af	model_0015	-48168.3
Acinetobacter_baumannii	af	model_0016	-48803.4
Acinetobacter_baumannii	af	model_0017	-48406.5
Acinetobacter_baumannii	af	model_0018	-48243.8
Acinetobacter_baumannii	af	model_0019	-48621
Acinetobacter_baumannii	af	model_0020	-48378.7
Acinetobacter_baumannii	af	model_0021	-48061.6
Acinetobacter_baumannii	af	model_0022	-48339.7
Acinetobacter_baumannii	af	model_0023	-48440.8
Acinetobacter_baumannii	af	model_0024	-48434.1
Acinetobacter_baumannii	af	model_0025	-48683.4
Acinetobacter_baumannii	af	model_0026	-48263.2
Acinetobacter_baumannii	af	model_0027	-48441.7
Acinetobacter_baumannii	af	model_0028	-48335
Acinetobacter_baumannii	af	model_0029	-48879.1
Acinetobacter_baumannii	af	model_0030	-48351.4
Acinetobacter_baumannii	af	model_0031	-48616.6
Acinetobacter_baumannii	af	model_0032	-48541.2
Acinetobacter_baumannii	af	model_0033	-48417.5
Acinetobacter_baumannii	af	model_0034	-48172.6
Acinetobacter_baumannii	af	model_0035	-48606.7
Acinetobacter_baumannii	af	model_0036	-48629.8
Acinetobacter_baumannii	af	model_0037	-48381.6
Acinetobacter_baumannii	af	model_0038	-47969.2
Acinetobacter_baumannii	af	model_0039	-48354.6
Acinetobacter_baumannii	af	model_0040	-48488.4
Acinetobacter_baumannii	af	model_0041	-48014.3
Acinetobacter_baumannii	af	model_0042	-48216.6
Acinetobacter_baumannii	af	model_0043	-48241.8
Acinetobacter_baumannii	af	model_0044	-48455.5
Acinetobacter_baumannii	af	model_0045	-48468.1
Acinetobacter_baumannii	af	model_0046	-48458.1
Acinetobacter_baumannii	af	model_0047	-47976.3
Acinetobacter_baumannii	af	model_0048	-48524.5
Acinetobacter_baumannii	af	model_0049	-48084.5
Acinetobacter_baumannii	af	model_0050	-48352.4
Acinetobacter_baumannii	af	model_0051	-48522.2
Acinetobacter_baumannii	af	model_0052	-48423.4
Acinetobacter_baumannii	af	model_0053	-48291.1
Acinetobacter_baumannii	af	model_0054	-48229.6
Acinetobacter_baumannii	af	model_0055	-48358.9
Acinetobacter_baumannii	af	model_0056	-48655.1
Acinetobacter_baumannii	af	model_0057	-48098.2
Acinetobacter_baumannii	af	model_0058	-47986.7
Acinetobacter_baumannii	af	model_0059	-48730.2
Acinetobacter_baumannii	af	model_0060	-48778.8
Acinetobacter_baumannii	af	model_0061	-47979.4
Acinetobacter_baumannii	af	model_0062	-48932.7
Acinetobacter_baumannii	af	model_0063	-48169.6
Acinetobacter_baumannii	af	model_0064	-48250.4
Acinetobacter_baumannii	af	model_0065	-48133.2
Acinetobacter_baumannii	af	model_0066	-48257.4
Acinetobacter_baumannii	af	model_0067	-48839.1
Acinetobacter_baumannii	af	model_0068	-48549.9
Acinetobacter_baumannii	af	model_0069	-48638.5
Acinetobacter_baumannii	af	model_0070	-48393.3
Acinetobacter_baumannii	af	model_0071	-48655.9
Acinetobacter_baumannii	af	model_0072	-48107.1
Acinetobacter_baumannii	af	model_0073	-48607
Acinetobacter_baumannii	af	model_0074	-48558.8
Acinetobacter_baumannii	af	model_0075	-48361.8
Acinetobacter_baumannii	af	model_0076	-48553.5
Acinetobacter_baumannii	af	model_0077	-48646.5
Acinetobacter_baumannii	af	model_0078	-48060.5
Acinetobacter_baumannii	af	model_0079	-48242.1
Acinetobacter_baumannii	af	model_0080	-48545.9
Acinetobacter_baumannii	af	model_0081	-48400.8
Acinetobacter_baumannii	af	model_0082	-48569
Acinetobacter_baumannii	af	model_0083	-48181.3
Acinetobacter_baumannii	af	model_0084	-48045.5
Acinetobacter_baumannii	af	model_0085	-48246.3
Acinetobacter_baumannii	af	model_0086	-48224.1
Acinetobacter_baumannii	af	model_0087	-48363.2
Acinetobacter_baumannii	af	model_0088	-48546.6
Acinetobacter_baumannii	af	model_0089	-48472.9
Acinetobacter_baumannii	af	model_0090	-48701.9
Acinetobacter_baumannii	af	model_0091	-48193.6
Acinetobacter_baumannii	af	model_0092	-48257
Acinetobacter_baumannii	af	model_0093	-48180.8
Acinetobacter_baumannii	af	model_0094	-47889.2
Acinetobacter_baumannii	af	model_0095	-48650
Acinetobacter_baumannii	af	model_0096	-48615.6
Acinetobacter_baumannii	af	model_0097	-48289.2
Acinetobacter_baumannii	af	model_0098	-48388
Acinetobacter_baumannii	af	model_0099	-48687.6
Acinetobacter_baumannii	af	model_0100	-48692.1
Acinetobacter_baumannii	af	model_0101	-48476.1
Acinetobacter_baumannii	af	model_0102	-48073.8
Acinetobacter_baumannii	af	model_0103	-48208.9
Acinetobacter_baumannii	af	model_0104	-48438.6
Acinetobacter_baumannii	af	model_0105	-48365.1
Acinetobacter_baumannii	af	model_0106	-48186.9
Acinetobacter_baumannii	af	model_0107	-48559.7
Acinetobacter_baumannii	af	model_0108	-48188.1
Acinetobacter_baumannii	af	model_0109	-48422.4
Acinetobacter_baumannii	af	model_0110	-48663.4
Acinetobacter_baumannii	af	model_0111	-47971.3
Acinetobacter_baumannii	af	model_0112	-48514.6
Acinetobacter_baumannii	af	model_0113	-48335.4
Acinetobacter_baumannii	af	model_0114	-48497.4
Acinetobacter_baumannii	af	model_0115	-48722.5
Acinetobacter_baumannii	af	model_0116	-48186.3
Acinetobacter_baumannii	af	model_0117	-48727
Acinetobacter_baumannii	af	model_0118	-48324.8
Acinetobacter_baumannii	af	model_0119	-48625.2
Acinetobacter_baumannii	af	model_0120	-48259.7
Acinetobacter_baumannii	af	model_0121	-48562.2
Acinetobacter_baumannii	af	model_0122	-48512.8
Acinetobacter_baumannii	af	model_0123	-48998.1
Acinetobacter_baumannii	af	model_0124	-48602.8
Acinetobacter_baumannii	af	model_0125	-48339.7
Acinetobacter_baumannii	af	model_0126	-48334.7
Acinetobacter_baumannii	af	model_0127	-48142.1
Acinetobacter_baumannii	af	model_0128	-48093.1
Acinetobacter_baumannii	af	model_0129	-48671.3
Acinetobacter_baumannii	af	model_0130	-48347
Acinetobacter_baumannii	af	model_0131	-48292.1
Acinetobacter_baumannii	af	model_0132	-48173.9
Acinetobacter_baumannii	af	model_0133	-48288.6
Acinetobacter_baumannii	af	model_0134	-48684
Acinetobacter_baumannii	af	model_0135	-48482.9
Acinetobacter_baumannii	af	model_0136	-48452.4
Acinetobacter_baumannii	af	model_0137	-48196.5
Acinetobacter_baumannii	af	model_0138	-48351.8
Acinetobacter_baumannii	af	model_0139	-48423.3
Acinetobacter_baumannii	af	model_0140	-48770.3
Acinetobacter_baumannii	af	model_0141	-48406.2
Acinetobacter_baumannii	af	model_0142	-48565.7
Acinetobacter_baumannii	af	model_0143	-48732.5
Acinetobacter_baumannii	af	model_0144	-48444.9
Acinetobacter_baumannii	af	model_0145	-48029.6
Acinetobacter_baumannii	af	model_0146	-48442.7
Acinetobacter_baumannii	af	model_0147	-48010.5
Acinetobacter_baumannii	af	model_0148	-48278
Acinetobacter_baumannii	af	model_0149	-48290.1
Acinetobacter_baumannii	af	model_0150	-48688.8
Acinetobacter_baumannii	af	model_0151	-48526.1
Acinetobacter_baumannii	af	model_0152	-48378.4
Acinetobacter_baumannii	af	model_0153	-48505.6
Acinetobacter_baumannii	af	model_0154	-48346.2
Acinetobacter_baumannii	af	model_0155	-48268.2
Acinetobacter_baumannii	af	model_0156	-48382.5
Acinetobacter_baumannii	af	model_0157	-48601.9
Acinetobacter_baumannii	af	model_0158	-48301.9
Acinetobacter_baumannii	af	model_0159	-48562.5
Acinetobacter_baumannii	af	model_0160	-48230.3
Acinetobacter_baumannii	af	model_0161	-48150.6
Acinetobacter_baumannii	af	model_0162	-48476
Acinetobacter_baumannii	af	model_0163	-48032.5
Acinetobacter_baumannii	af	model_0164	-48298.5
Acinetobacter_baumannii	af	model_0165	-48260.5
Acinetobacter_baumannii	af	model_0166	-48506.1
Acinetobacter_baumannii	af	model_0167	-47978.7
Acinetobacter_baumannii	af	model_0168	-48753.7
Acinetobacter_baumannii	af	model_0169	-48779.6
Acinetobacter_baumannii	af	model_0170	-48956
Acinetobacter_baumannii	af	model_0171	-48068.1
Acinetobacter_baumannii	af	model_0172	-48115.6
Acinetobacter_baumannii	af	model_0173	-48476.9
Acinetobacter_baumannii	af	model_0174	-48438.7
Acinetobacter_baumannii	af	model_0175	-47754.2
Acinetobacter_baumannii	af	model_0176	-48718.9
Acinetobacter_baumannii	af	model_0177	-48729.1
Acinetobacter_baumannii	af	model_0178	-48629.9
Acinetobacter_baumannii	af	model_0179	-48377
Acinetobacter_baumannii	af	model_0180	-48198.5
Acinetobacter_baumannii	af	model_0181	-48316.5
Acinetobacter_baumannii	af	model_0182	-48456.8
Acinetobacter_baumannii	af	model_0183	-48018.8
Acinetobacter_baumannii	af	model_0184	-47931
Acinetobacter_baumannii	af	model_0185	-48917.8
Acinetobacter_baumannii	af	model_0186	-48584.1
Acinetobacter_baumannii	af	model_0187	-48113.1
Acinetobacter_baumannii	af	model_0188	-48561.7
Acinetobacter_baumannii	af	model_0189	-48542.1
Acinetobacter_baumannii	af	model_0190	-47823.7
Acinetobacter_baumannii	af	model_0191	-48485.1
Acinetobacter_baumannii	af	model_0192	-48552.2
Acinetobacter_baumannii	af	model_0193	-48121.5
Acinetobacter_baumannii	af	model_0194	-48817.1
Acinetobacter_baumannii	af	model_0195	-48155.8
Acinetobacter_baumannii	af	model_0196	-48808.1
Acinetobacter_baumannii	af	model_0197	-48824.7
Acinetobacter_baumannii	af	model_0198	-48732.2
Acinetobacter_baumannii	af	model_0199	-48307.6
Acinetobacter_baumannii	af	model_0200	-48159.7
Acinetobacter_baumannii	af	model_0201	-48478.1
Acinetobacter_baumannii	af	model_0202	-48237.2
Acinetobacter_baumannii	af	model_0203	-48683.1
Acinetobacter_baumannii	af	model_0204	-48677
Acinetobacter_baumannii	af	model_0205	-48460
Acinetobacter_baumannii	af	model_0206	-48216.5
Acinetobacter_baumannii	af	model_0207	-48679.3
Acinetobacter_baumannii	af	model_0208	-48394.8
Acinetobacter_baumannii	af	model_0209	-48100.6
Acinetobacter_baumannii	af	model_0210	-48679
Acinetobacter_baumannii	af	model_0211	-48532.3
Acinetobacter_baumannii	af	model_0212	-48317.5
Acinetobacter_baumannii	af	model_0213	-48573.2
Acinetobacter_baumannii	af	model_0214	-48616.2
Acinetobacter_baumannii	af	model_0215	-48184.1
Acinetobacter_baumannii	af	model_0216	-48467.2
Acinetobacter_baumannii	af	model_0217	-48232.2
Acinetobacter_baumannii	af	model_0218	-48477.3
Acinetobacter_baumannii	af	model_0219	-48408.2
Acinetobacter_baumannii	af	model_0220	-48806.3
Acinetobacter_baumannii	af	model_0221	-47579.7
Acinetobacter_baumannii	af	model_0222	-48628.6
Acinetobacter_baumannii	af	model_0223	-48600.2
Acinetobacter_baumannii	af	model_0224	-48291.2
Acinetobacter_baumannii	af	model_0225	-48587.4
Acinetobacter_baumannii	af	model_0226	-48348.5
Acinetobacter_baumannii	af	model_0227	-48579.2
Acinetobacter_baumannii	af	model_0228	-48216.2
Acinetobacter_baumannii	af	model_0229	-48560.9
Acinetobacter_baumannii	af	model_0230	-47966.6
Acinetobacter_baumannii	af	model_0231	-47977.9
Acinetobacter_baumannii	af	model_0232	-48325.1
Acinetobacter_baumannii	af	model_0233	-48577.9
Acinetobacter_baumannii	af	model_0234	-48427.5
Acinetobacter_baumannii	af	model_0235	-48868.7
Acinetobacter_baumannii	af	model_0236	-48330.5
Acinetobacter_baumannii	af	model_0237	-48795.3
Acinetobacter_baumannii	af	model_0238	-48134
Acinetobacter_baumannii	af	model_0239	-48038.6
Acinetobacter_baumannii	af	model_0240	-48259.3
Acinetobacter_baumannii	af	model_0241	-48404.6
Acinetobacter_baumannii	af	model_0242	-48424.4
Acinetobacter_baumannii	af	model_0243	-48067.8
Acinetobacter_baumannii	af	model_0244	-48520.5
Acinetobacter_baumannii	af	model_0245	-48465.7
Acinetobacter_baumannii	af	model_0246	-48332.8
Acinetobacter_baumannii	af	model_0247	-48380.2
Acinetobacter_baumannii	af	model_0248	-48586.4
Acinetobacter_baumannii	af	model_0249	-48471.6
Acinetobacter_baumannii	af	model_0250	-48604.9
Acinetobacter_baumannii	af	model_0251	-48575.8
Acinetobacter_baumannii	af	model_0252	-48509.7
Acinetobacter_baumannii	af	model_0253	-48279.3
Acinetobacter_baumannii	af	model_0254	-48234.7
Acinetobacter_baumannii	af	model_0255	-48332.9
Acinetobacter_baumannii	af	model_0256	-48508.2
Acinetobacter_baumannii	af	model_0257	-48391.8
Acinetobacter_baumannii	af	model_0258	-48845.5
Acinetobacter_baumannii	af	model_0259	-48407
Acinetobacter_baumannii	af	model_0260	-48025.6
Acinetobacter_baumannii	af	model_0261	-48701.2
Acinetobacter_baumannii	af	model_0262	-48573.8
Acinetobacter_baumannii	af	model_0263	-48464.9
Acinetobacter_baumannii	af	model_0264	-48311.9
Acinetobacter_baumannii	af	model_0265	-48277.9
Acinetobacter_baumannii	af	model_0266	-48384.2
Acinetobacter_baumannii	af	model_0267	-48660.8
Acinetobacter_baumannii	af	model_0268	-48718
Acinetobacter_baumannii	af	model_0269	-48199.3
Acinetobacter_baumannii	af	model_0270	-48058.7
Acinetobacter_baumannii	af	model_0271	-48259.8
Acinetobacter_baumannii	af	model_0272	-48317.4
Acinetobacter_baumannii	af	model_0273	-48290.2
Acinetobacter_baumannii	af	model_0274	-48207.8
Acinetobacter_baumannii	af	model_0275	-48266.9
Acinetobacter_baumannii	af	model_0276	-48316.5
Acinetobacter_baumannii	af	model_0277	-48643.2
Acinetobacter_baumannii	af	model_0278	-48368.1
Acinetobacter_baumannii	af	model_0279	-48058.7
Acinetobacter_baumannii	af	model_0280	-48497.7
Acinetobacter_baumannii	af	model_0281	-48092.3
Acinetobacter_baumannii	af	model_0282	-48579.2
Acinetobacter_baumannii	af	model_0283	-48109.3
Acinetobacter_baumannii	af	model_0284	-48554.4
Acinetobacter_baumannii	af	model_0285	-48392.3
Acinetobacter_baumannii	af	model_0286	-48495.6
Acinetobacter_baumannii	af	model_0287	-48674.2
Acinetobacter_baumannii	af	model_0288	-48546.8
Acinetobacter_baumannii	af	model_0289	-48484.8
Acinetobacter_baumannii	af	model_0290	-48373.5
Acinetobacter_baumannii	af	model_0291	-48404.9
Acinetobacter_baumannii	af	model_0292	-48460.1
Acinetobacter_baumannii	af	model_0293	-48200.7
Acinetobacter_baumannii	af	model_0294	-47826.4
Acinetobacter_baumannii	af	model_0295	-48263.9
Acinetobacter_baumannii	af	model_0296	-48000.1
Acinetobacter_baumannii	af	model_0297	-48484.9
Acinetobacter_baumannii	af	model_0298	-48328.8
Acinetobacter_baumannii	af	model_0299	-48411.8
Acinetobacter_baumannii	af	model_0300	-48247.9
Acinetobacter_baumannii	af	model_0301	-48473.1
Acinetobacter_baumannii	af	model_0302	-48544.3
Acinetobacter_baumannii	af	model_0303	-48732.2
Acinetobacter_baumannii	af	model_0304	-48277.6
Acinetobacter_baumannii	af	model_0305	-48506.3
Acinetobacter_baumannii	af	model_0306	-48524.7
Acinetobacter_baumannii	af	model_0307	-48793.8
Acinetobacter_baumannii	af	model_0308	-48296.4
Acinetobacter_baumannii	af	model_0309	-48122.8
Acinetobacter_baumannii	af	model_0310	-48186.7
Acinetobacter_baumannii	af	model_0311	-48254.6
Acinetobacter_baumannii	af	model_0312	-48586.3
Acinetobacter_baumannii	af	model_0313	-48364.4
Acinetobacter_baumannii	af	model_0314	-48571.6
Acinetobacter_baumannii	af	model_0315	-48422.2
Acinetobacter_baumannii	af	model_0316	-48133.9
Acinetobacter_baumannii	af	model_0317	-48133.5
Acinetobacter_baumannii	af	model_0318	-48567.9
Acinetobacter_baumannii	af	model_0319	-48705.2
Acinetobacter_baumannii	af	model_0320	-48640.7
Acinetobacter_baumannii	af	model_0321	-48170.4
Acinetobacter_baumannii	af	model_0322	-48275.1
Acinetobacter_baumannii	af	model_0323	-48438
Acinetobacter_baumannii	af	model_0324	-48494.3
Acinetobacter_baumannii	af	model_0325	-48597
Acinetobacter_baumannii	af	model_0326	-48296.5
Acinetobacter_baumannii	af	model_0327	-48341.3
Acinetobacter_baumannii	af	model_0328	-48790.7
Acinetobacter_baumannii	af	model_0329	-48797.7
Acinetobacter_baumannii	af	model_0330	-48555.4
Acinetobacter_baumannii	af	model_0331	-48141.6
Acinetobacter_baumannii	af	model_0332	-48335.9
Acinetobacter_baumannii	af	model_0333	-48948.2
Acinetobacter_baumannii	af	model_0334	-48708.9
Acinetobacter_baumannii	af	model_0335	-48167.9
Acinetobacter_baumannii	af	model_0336	-48444.1
Acinetobacter_baumannii	af	model_0337	-48768.3
Acinetobacter_baumannii	af	model_0338	-48693
Acinetobacter_baumannii	af	model_0339	-48233.3
Acinetobacter_baumannii	af	model_0340	-48313.4
Acinetobacter_baumannii	af	model_0341	-48309.9
Acinetobacter_baumannii	af	model_0342	-48741.3
Acinetobacter_baumannii	af	model_0343	-48593
Acinetobacter_baumannii	af	model_0344	-48683
Acinetobacter_baumannii	af	model_0345	-48382.1
Acinetobacter_baumannii	af	model_0346	-48712.3
Acinetobacter_baumannii	af	model_0347	-48059.9
Acinetobacter_baumannii	af	model_0348	-48076
Acinetobacter_baumannii	af	model_0349	-48218.3
Acinetobacter_baumannii	af	model_0350	-48385.1
Acinetobacter_baumannii	af	model_0351	-48705.8
Acinetobacter_baumannii	af	model_0352	-48485.5
Acinetobacter_baumannii	af	model_0353	-48261.9
Acinetobacter_baumannii	af	model_0354	-48394.5
Acinetobacter_baumannii	af	model_0355	-48459.5
Acinetobacter_baumannii	af	model_0356	-48163.7
Acinetobacter_baumannii	af	model_0357	-48203.7
Acinetobacter_baumannii	af	model_0358	-48258.7
Acinetobacter_baumannii	af	model_0359	-48403.5
Acinetobacter_baumannii	af	model_0360	-48919.7
Acinetobacter_baumannii	af	model_0361	-48541
Acinetobacter_baumannii	af	model_0362	-48332.4
Acinetobacter_baumannii	af	model_0363	-47702.2
Acinetobacter_baumannii	af	model_0364	-48734.9
Acinetobacter_baumannii	af	model_0365	-48319.4
Acinetobacter_baumannii	af	model_0366	-48908.9
Acinetobacter_baumannii	af	model_0367	-48218.1
Acinetobacter_baumannii	af	model_0368	-48199.7
Acinetobacter_baumannii	af	model_0369	-48272.2
Acinetobacter_baumannii	af	model_0370	-48387.5
Acinetobacter_baumannii	af	model_0371	-48608.9
Acinetobacter_baumannii	af	model_0372	-48125.6
Acinetobacter_baumannii	af	model_0373	-48550.4
Acinetobacter_baumannii	af	model_0374	-48671.5
Acinetobacter_baumannii	af	model_0375	-48441.2
Acinetobacter_baumannii	af	model_0376	-48037.7
Acinetobacter_baumannii	af	model_0377	-48426
Acinetobacter_baumannii	af	model_0378	-48248.4
Acinetobacter_baumannii	af	model_0379	-48427.6
Acinetobacter_baumannii	af	model_0380	-48468.9
Acinetobacter_baumannii	af	model_0381	-48258.1
Acinetobacter_baumannii	af	model_0382	-48506
Acinetobacter_baumannii	af	model_0383	-48512.4
Acinetobacter_baumannii	af	model_0384	-48681.4
Acinetobacter_baumannii	af	model_0385	-47859
Acinetobacter_baumannii	af	model_0386	-48170.1
Acinetobacter_baumannii	af	model_0387	-48205.3
Acinetobacter_baumannii	af	model_0388	-48491.4
Acinetobacter_baumannii	af	model_0389	-48506.2
Acinetobacter_baumannii	af	model_0390	-48413.1
Acinetobacter_baumannii	af	model_0391	-48356.5
Acinetobacter_baumannii	af	model_0392	-48470.4
Acinetobacter_baumannii	af	model_0393	-48148.6
Acinetobacter_baumannii	af	model_0394	-48363.5
Acinetobacter_baumannii	af	model_0395	-48777.5
Acinetobacter_baumannii	af	model_0396	-48444.7
Acinetobacter_baumannii	af	model_0397	-48338.5
Acinetobacter_baumannii	af	model_0398	-48589.5
Acinetobacter_baumannii	af	model_0399	-48690.6
Acinetobacter_baumannii	af	model_0400	-48367.6
Acinetobacter_baumannii	af	model_0401	-48797.2
Acinetobacter_baumannii	af	model_0402	-47874
Acinetobacter_baumannii	af	model_0403	-48056.4
Acinetobacter_baumannii	af	model_0404	-48755.9
Acinetobacter_baumannii	af	model_0405	-48358.5
Acinetobacter_baumannii	af	model_0406	-47667.2
Acinetobacter_baumannii	af	model_0407	-48235.5
Acinetobacter_baumannii	af	model_0408	-48633.4
Acinetobacter_baumannii	af	model_0409	-47914.8
Acinetobacter_baumannii	af	model_0410	-48219.3
Acinetobacter_baumannii	af	model_0411	-48216.8
Acinetobacter_baumannii	af	model_0412	-48726.6
Acinetobacter_baumannii	af	model_0413	-48132.2
Acinetobacter_baumannii	af	model_0414	-48471.8
Acinetobacter_baumannii	af	model_0415	-48234.2
Acinetobacter_baumannii	af	model_0416	-48432.9
Acinetobacter_baumannii	af	model_0417	-48559.4
Acinetobacter_baumannii	af	model_0418	-48127.4
Acinetobacter_baumannii	af	model_0419	-48499
Acinetobacter_baumannii	af	model_0420	-48236
Acinetobacter_baumannii	af	model_0421	-48162.6
Acinetobacter_baumannii	af	model_0422	-47983.4
Acinetobacter_baumannii	af	model_0423	-48450.3
Acinetobacter_baumannii	af	model_0424	-47995.4
Acinetobacter_baumannii	af	model_0425	-48529.2
Acinetobacter_baumannii	af	model_0426	-48698.7
Acinetobacter_baumannii	af	model_0427	-48279.4
Acinetobacter_baumannii	af	model_0428	-48428.8
Acinetobacter_baumannii	af	model_0429	-48437.2
Acinetobacter_baumannii	af	model_0430	-47961
Acinetobacter_baumannii	af	model_0431	-48696.2
Acinetobacter_baumannii	af	model_0432	-48303.2
Acinetobacter_baumannii	af	model_0433	-48242.3
Acinetobacter_baumannii	af	model_0434	-48123.7
Acinetobacter_baumannii	af	model_0435	-48189.4
Acinetobacter_baumannii	af	model_0436	-48105
Acinetobacter_baumannii	af	model_0437	-48140.9
Acinetobacter_baumannii	af	model_0438	-48253.9
Acinetobacter_baumannii	af	model_0439	-48808.5
Acinetobacter_baumannii	af	model_0440	-48464.6
Acinetobacter_baumannii	af	model_0441	-48404.1
Acinetobacter_baumannii	af	model_0442	-48458.7
Acinetobacter_baumannii	af	model_0443	-48537.5
Acinetobacter_baumannii	af	model_0444	-48591.9
Acinetobacter_baumannii	af	model_0445	-48965.4
Acinetobacter_baumannii	af	model_0446	-48489
Acinetobacter_baumannii	af	model_0447	-48676
Acinetobacter_baumannii	af	model_0448	-48379.2
Acinetobacter_baumannii	af	model_0449	-48342.9
Acinetobacter_baumannii	af	model_0450	-48369.6
Acinetobacter_baumannii	af	model_0451	-48539
Acinetobacter_baumannii	af	model_0452	-48291.1
Acinetobacter_baumannii	af	model_0453	-48515.9
Acinetobacter_baumannii	af	model_0454	-48272.1
Acinetobacter_baumannii	af	model_0455	-48365.3
Acinetobacter_baumannii	af	model_0456	-48867.9
Acinetobacter_baumannii	af	model_0457	-48638.1
Acinetobacter_baumannii	af	model_0458	-48514.8
Acinetobacter_baumannii	af	model_0459	-48649.6
Acinetobacter_baumannii	af	model_0460	-48411.2
Acinetobacter_baumannii	af	model_0461	-48609.4
Acinetobacter_baumannii	af	model_0462	-48126.7
Acinetobacter_baumannii	af	model_0463	-48572.1
Acinetobacter_baumannii	af	model_0464	-48689.8
Acinetobacter_baumannii	af	model_0465	-49007.3
Acinetobacter_baumannii	af	model_0466	-49005.7
Acinetobacter_baumannii	af	model_0467	-47984.1
Acinetobacter_baumannii	af	model_0468	-48708.2
Acinetobacter_baumannii	af	model_0469	-48510.1
Acinetobacter_baumannii	af	model_0470	-48500.9
Acinetobacter_baumannii	af	model_0471	-48367.2
Acinetobacter_baumannii	af	model_0472	-48655.1
Acinetobacter_baumannii	af	model_0473	-48560.2
Acinetobacter_baumannii	af	model_0474	-48509.4
Acinetobacter_baumannii	af	model_0475	-49033.1
Acinetobacter_baumannii	af	model_0476	-48287.5
Acinetobacter_baumannii	af	model_0477	-48726.4
Acinetobacter_baumannii	af	model_0478	-48754.7
Acinetobacter_baumannii	af	model_0479	-48477
Acinetobacter_baumannii	af	model_0480	-48261.5
Acinetobacter_baumannii	af	model_0481	-48425.4
Acinetobacter_baumannii	af	model_0482	-48323.6
Acinetobacter_baumannii	af	model_0483	-48679.1
Acinetobacter_baumannii	af	model_0484	-48351.8
Acinetobacter_baumannii	af	model_0485	-48849.8
Acinetobacter_baumannii	af	model_0486	-48577.4
Acinetobacter_baumannii	af	model_0487	-48051.3
Acinetobacter_baumannii	af	model_0488	-48523.6
Acinetobacter_baumannii	af	model_0489	-48129.7
Acinetobacter_baumannii	af	model_0490	-48482.3
Acinetobacter_baumannii	af	model_0491	-48315.3
Acinetobacter_baumannii	af	model_0492	-48610.6
Acinetobacter_baumannii	af	model_0493	-48455.3
Acinetobacter_baumannii	af	model_0494	-48389.8
Acinetobacter_baumannii	af	model_0495	-48329
Acinetobacter_baumannii	af	model_0496	-48762.7
Acinetobacter_baumannii	af	model_0497	-48299.5
Acinetobacter_baumannii	af	model_0498	-48366
Acinetobacter_baumannii	af	model_0499	-48253.8
Acinetobacter_baumannii	af	model_0500	-48537.2
Acinetobacter_baumannii	af	model_0501	-48479.5
Acinetobacter_baumannii	af	model_0502	-48743.7
Acinetobacter_baumannii	af	model_0503	-48097.3
Acinetobacter_baumannii	af	model_0504	-48613.5
Acinetobacter_baumannii	af	model_0505	-48458.7
Acinetobacter_baumannii	af	model_0506	-48430.1
Acinetobacter_baumannii	af	model_0507	-48276.7
Acinetobacter_baumannii	af	model_0508	-48568.8
Acinetobacter_baumannii	af	model_0509	-48300.5
Acinetobacter_baumannii	af	model_0510	-48194.1
Acinetobacter_baumannii	af	model_0511	-48324.2
Acinetobacter_baumannii	af	model_0512	-48325.4
Acinetobacter_baumannii	af	model_0513	-48207.2
Acinetobacter_baumannii	af	model_0514	-48367.2
Acinetobacter_baumannii	af	model_0515	-48628.3
Acinetobacter_baumannii	af	model_0516	-48551.5
Acinetobacter_baumannii	af	model_0517	-48512.9
Acinetobacter_baumannii	af	model_0518	-48633.2
Acinetobacter_baumannii	af	model_0519	-47862.3
Acinetobacter_baumannii	af	model_0520	-48714.1
Acinetobacter_baumannii	af	model_0521	-47902.9
Acinetobacter_baumannii	af	model_0522	-48262.8
Acinetobacter_baumannii	af	model_0523	-48380.7
Acinetobacter_baumannii	af	model_0524	-48188.7
Acinetobacter_baumannii	af	model_0525	-48694.5
Acinetobacter_baumannii	af	model_0526	-48040.8
Acinetobacter_baumannii	af	model_0527	-48430.8
Acinetobacter_baumannii	af	model_0528	-48475.6
Acinetobacter_baumannii	af	model_0529	-48492
Acinetobacter_baumannii	af	model_0530	-48571.7
Acinetobacter_baumannii	af	model_0531	-48638.6
Acinetobacter_baumannii	af	model_0532	-48188
Acinetobacter_baumannii	af	model_0533	-48111
Acinetobacter_baumannii	af	model_0534	-48224
Acinetobacter_baumannii	af	model_0535	-48694.1
Acinetobacter_baumannii	af	model_0536	-48338.5
Acinetobacter_baumannii	af	model_0537	-48247.5
Acinetobacter_baumannii	af	model_0538	-48604.6
Acinetobacter_baumannii	af	model_0539	-48673.6
Acinetobacter_baumannii	af	model_0540	-48394.7
Acinetobacter_baumannii	af	model_0541	-48211.6
Acinetobacter_baumannii	af	model_0542	-48263.1
Acinetobacter_baumannii	af	model_0543	-47917.9
Acinetobacter_baumannii	af	model_0544	-48257.5
Acinetobacter_baumannii	af	model_0545	-48232.4
Acinetobacter_baumannii	af	model_0546	-48714
Acinetobacter_baumannii	af	model_0547	-48796.5
Acinetobacter_baumannii	af	model_0548	-48020
Acinetobacter_baumannii	af	model_0549	-48527.5
Acinetobacter_baumannii	af	model_0550	-48347.7
Acinetobacter_baumannii	af	model_0551	-48582.3
Acinetobacter_baumannii	af	model_0552	-48275.1
Acinetobacter_baumannii	af	model_0553	-48454.9
Acinetobacter_baumannii	af	model_0554	-48600.1
Acinetobacter_baumannii	af	model_0555	-48553.6
Acinetobacter_baumannii	af	model_0556	-48564.2
Acinetobacter_baumannii	af	model_0557	-48083.2
Acinetobacter_baumannii	af	model_0558	-48489.2
Acinetobacter_baumannii	af	model_0559	-48758.6
Acinetobacter_baumannii	af	model_0560	-48547.5
Acinetobacter_baumannii	af	model_0561	-48850.9
Acinetobacter_baumannii	af	model_0562	-48255.3
Acinetobacter_baumannii	af	model_0563	-48503.3
Acinetobacter_baumannii	af	model_0564	-48645.1
Acinetobacter_baumannii	af	model_0565	-48647.9
Acinetobacter_baumannii	af	model_0566	-48681.1
Acinetobacter_baumannii	af	model_0567	-47916.7
Acinetobacter_baumannii	af	model_0568	-48543.7
Acinetobacter_baumannii	af	model_0569	-48556.1
Acinetobacter_baumannii	af	model_0570	-48207.9
Acinetobacter_baumannii	af	model_0571	-48330.8
Acinetobacter_baumannii	af	model_0572	-48213.1
Acinetobacter_baumannii	af	model_0573	-48268.1
Acinetobacter_baumannii	af	model_0574	-48506.9
Acinetobacter_baumannii	af	model_0575	-48480.2
Acinetobacter_baumannii	af	model_0576	-48341.9
Acinetobacter_baumannii	af	model_0577	-48486.4
Acinetobacter_baumannii	af	model_0578	-47858.6
Acinetobacter_baumannii	af	model_0579	-48439.6
Acinetobacter_baumannii	af	model_0580	-48351.1
Acinetobacter_baumannii	af	model_0581	-48362.4
Acinetobacter_baumannii	af	model_0582	-48562.5
Acinetobacter_baumannii	af	model_0583	-48491.9
Acinetobacter_baumannii	af	model_0584	-49007.2
Acinetobacter_baumannii	af	model_0585	-48022.3
Acinetobacter_baumannii	af	model_0586	-48291.5
Acinetobacter_baumannii	af	model_0587	-48410.6
Acinetobacter_baumannii	af	model_0588	-48234.3
Acinetobacter_baumannii	af	model_0589	-48719.3
Acinetobacter_baumannii	af	model_0590	-48454.1
Acinetobacter_baumannii	af	model_0591	-48440.4
Acinetobacter_baumannii	af	model_0592	-48439
Acinetobacter_baumannii	af	model_0593	-48406.7
Acinetobacter_baumannii	af	model_0594	-48214.9
Acinetobacter_baumannii	af	model_0595	-48119
Acinetobacter_baumannii	af	model_0596	-48468.1
Acinetobacter_baumannii	af	model_0597	-48527.6
Acinetobacter_baumannii	af	model_0598	-48151.1
Acinetobacter_baumannii	af	model_0599	-48252.7
Acinetobacter_baumannii	af	model_0600	-48067.4
Acinetobacter_baumannii	af	model_0601	-48132.6
Acinetobacter_baumannii	af	model_0602	-48348.7
Acinetobacter_baumannii	af	model_0603	-48808.7
Acinetobacter_baumannii	af	model_0604	-48159.3
Acinetobacter_baumannii	af	model_0605	-48239.1
Acinetobacter_baumannii	af	model_0606	-48365.7
Acinetobacter_baumannii	af	model_0607	-48309.5
Acinetobacter_baumannii	af	model_0608	-48628.3
Acinetobacter_baumannii	af	model_0609	-48841.9
Acinetobacter_baumannii	af	model_0610	-48507
Acinetobacter_baumannii	af	model_0611	-48779.2
Acinetobacter_baumannii	af	model_0612	-48393.2
Acinetobacter_baumannii	af	model_0613	-48197.3
Acinetobacter_baumannii	af	model_0614	-48315.4
Acinetobacter_baumannii	af	model_0615	-48252.4
Acinetobacter_baumannii	af	model_0616	-48441.9
Acinetobacter_baumannii	af	model_0617	-48513.7
Acinetobacter_baumannii	af	model_0618	-48572.3
Acinetobacter_baumannii	af	model_0619	-48691
Acinetobacter_baumannii	af	model_0620	-48111.7
Acinetobacter_baumannii	af	model_0621	-48026.2
Acinetobacter_baumannii	af	model_0622	-48498
Acinetobacter_baumannii	af	model_0623	-48296.7
Acinetobacter_baumannii	af	model_0624	-48328
Acinetobacter_baumannii	af	model_0625	-48437.2
Acinetobacter_baumannii	af	model_0626	-47891.4
Acinetobacter_baumannii	af	model_0627	-48894.5
Acinetobacter_baumannii	af	model_0628	-48380.8
Acinetobacter_baumannii	af	model_0629	-48201.2
Acinetobacter_baumannii	af	model_0630	-48429
Acinetobacter_baumannii	af	model_0631	-48569.9
Acinetobacter_baumannii	af	model_0632	-48875.2
Acinetobacter_baumannii	af	model_0633	-48355.6
Acinetobacter_baumannii	af	model_0634	-48533.3
Acinetobacter_baumannii	af	model_0635	-48591.9
Acinetobacter_baumannii	af	model_0636	-48411.8
Acinetobacter_baumannii	af	model_0637	-48216.8
Acinetobacter_baumannii	af	model_0638	-48634
Acinetobacter_baumannii	af	model_0639	-48002.2
Acinetobacter_baumannii	af	model_0640	-48224.7
Acinetobacter_baumannii	af	model_0641	-48285.7
Acinetobacter_baumannii	af	model_0642	-48571.4
Acinetobacter_baumannii	af	model_0643	-48798.9
Acinetobacter_baumannii	af	model_0644	-48498.1
Acinetobacter_baumannii	af	model_0645	-48421
Acinetobacter_baumannii	af	model_0646	-48509.9
Acinetobacter_baumannii	af	model_0647	-48264.3
Acinetobacter_baumannii	af	model_0648	-48539.9
Acinetobacter_baumannii	af	model_0649	-48595.4
Acinetobacter_baumannii	af	model_0650	-48543
Acinetobacter_baumannii	af	model_0651	-48357.9
Acinetobacter_baumannii	af	model_0652	-48563
Acinetobacter_baumannii	af	model_0653	-48545.5
Acinetobacter_baumannii	af	model_0654	-47983.9
Acinetobacter_baumannii	af	model_0655	-48434.2
Acinetobacter_baumannii	af	model_0656	-48577.9
Acinetobacter_baumannii	af	model_0657	-48275.3
Acinetobacter_baumannii	af	model_0658	-48754.2
Acinetobacter_baumannii	af	model_0659	-48274.7
Acinetobacter_baumannii	af	model_0660	-48398.4
Acinetobacter_baumannii	af	model_0661	-48595.5
Acinetobacter_baumannii	af	model_0662	-48653.9
Acinetobacter_baumannii	af	model_0663	-48581.7
Acinetobacter_baumannii	af	model_0664	-48535.5
Acinetobacter_baumannii	af	model_0665	-48638.3
Acinetobacter_baumannii	af	model_0666	-48237.6
Acinetobacter_baumannii	af	model_0667	-48297.6
Acinetobacter_baumannii	af	model_0668	-48493
Acinetobacter_baumannii	af	model_0669	-48349.4
Acinetobacter_baumannii	af	model_0670	-48316
Acinetobacter_baumannii	af	model_0671	-48524.6
Acinetobacter_baumannii	af	model_0672	-48739.5
Acinetobacter_baumannii	af	model_0673	-48629.9
Acinetobacter_baumannii	af	model_0674	-48382
Acinetobacter_baumannii	af	model_0675	-48590.2
Acinetobacter_baumannii	af	model_0676	-48329.7
Acinetobacter_baumannii	af	model_0677	-48707.2
Acinetobacter_baumannii	af	model_0678	-48798.2
Acinetobacter_baumannii	af	model_0679	-48356.3
Acinetobacter_baumannii	af	model_0680	-48369.9
Acinetobacter_baumannii	af	model_0681	-48877.2
Acinetobacter_baumannii	af	model_0682	-48590.3
Acinetobacter_baumannii	af	model_0683	-48830.1
Acinetobacter_baumannii	af	model_0684	-48514.7
Acinetobacter_baumannii	af	model_0685	-48327.6
Acinetobacter_baumannii	af	model_0686	-48181
Acinetobacter_baumannii	af	model_0687	-48459.5
Acinetobacter_baumannii	af	model_0688	-48275.5
Acinetobacter_baumannii	af	model_0689	-48473
Acinetobacter_baumannii	af	model_0690	-48362.4
Acinetobacter_baumannii	af	model_0691	-48064.3
Acinetobacter_baumannii	af	model_0692	-48735.4
Acinetobacter_baumannii	af	model_0693	-48461.3
Acinetobacter_baumannii	af	model_0694	-48220.8
Acinetobacter_baumannii	af	model_0695	-48502.1
Acinetobacter_baumannii	af	model_0696	-48335.5
Acinetobacter_baumannii	af	model_0697	-48486.1
Acinetobacter_baumannii	af	model_0698	-48515.9
Acinetobacter_baumannii	af	model_0699	-47757.8
Acinetobacter_baumannii	af	model_0700	-48544.8
Acinetobacter_baumannii	af	model_0701	-48574.3
Acinetobacter_baumannii	af	model_0702	-48545.6
Acinetobacter_baumannii	af	model_0703	-48462.1
Acinetobacter_baumannii	af	model_0704	-48561.6
Acinetobacter_baumannii	af	model_0705	-48392.8
Acinetobacter_baumannii	af	model_0706	-48904.8
Acinetobacter_baumannii	af	model_0707	-47899.3
Acinetobacter_baumannii	af	model_0708	-48257.2
Acinetobacter_baumannii	af	model_0709	-48314.5
Acinetobacter_baumannii	af	model_0710	-48628.8
Acinetobacter_baumannii	af	model_0711	-48436.4
Acinetobacter_baumannii	af	model_0712	-48397.3
Acinetobacter_baumannii	af	model_0713	-48330.9
Acinetobacter_baumannii	af	model_0714	-48763.2
Acinetobacter_baumannii	af	model_0715	-48001.6
Acinetobacter_baumannii	af	model_0716	-48295.8
Acinetobacter_baumannii	af	model_0717	-48429.4
Acinetobacter_baumannii	af	model_0718	-48373.1
Acinetobacter_baumannii	af	model_0719	-48269.2
Acinetobacter_baumannii	af	model_0720	-48351.2
Acinetobacter_baumannii	af	model_0721	-48614.7
Acinetobacter_baumannii	af	model_0722	-48317.7
Acinetobacter_baumannii	af	model_0723	-48725.3
Acinetobacter_baumannii	af	model_0724	-48251.5
Acinetobacter_baumannii	af	model_0725	-48488.6
Acinetobacter_baumannii	af	model_0726	-48538.8
Acinetobacter_baumannii	af	model_0727	-48402.2
Acinetobacter_baumannii	af	model_0728	-48476.3
Acinetobacter_baumannii	af	model_0729	-48616.3
Acinetobacter_baumannii	af	model_0730	-48523.9
Acinetobacter_baumannii	af	model_0731	-48221.6
Acinetobacter_baumannii	af	model_0732	-49027.3
Acinetobacter_baumannii	af	model_0733	-48481.4
Acinetobacter_baumannii	af	model_0734	-48162.1
Acinetobacter_baumannii	af	model_0735	-48622.8
Acinetobacter_baumannii	af	model_0736	-48367.5
Acinetobacter_baumannii	af	model_0737	-48346.8
Acinetobacter_baumannii	af	model_0738	-48879.3
Acinetobacter_baumannii	af	model_0739	-48376.8
Acinetobacter_baumannii	af	model_0740	-48288.5
Acinetobacter_baumannii	af	model_0741	-48317.9
Acinetobacter_baumannii	af	model_0742	-48558.1
Acinetobacter_baumannii	af	model_0743	-48268
Acinetobacter_baumannii	af	model_0744	-48786
Acinetobacter_baumannii	af	model_0745	-48086.2
Acinetobacter_baumannii	af	model_0746	-48988
Acinetobacter_baumannii	af	model_0747	-48786.2
Acinetobacter_baumannii	af	model_0748	-47902.9
Acinetobacter_baumannii	af	model_0749	-48735.8
Acinetobacter_baumannii	af	model_0750	-48622.8
Acinetobacter_baumannii	af	model_0751	-48362.5
Acinetobacter_baumannii	af	model_0752	-48388.4
Acinetobacter_baumannii	af	model_0753	-48173.8
Acinetobacter_baumannii	af	model_0754	-48542.5
Acinetobacter_baumannii	af	model_0755	-48643.5
Acinetobacter_baumannii	af	model_0756	-48401.8
Acinetobacter_baumannii	af	model_0757	-48012.1
Acinetobacter_baumannii	af	model_0758	-48497.4
Acinetobacter_baumannii	af	model_0759	-48093.2
Acinetobacter_baumannii	af	model_0760	-48817.6
Acinetobacter_baumannii	af	model_0761	-48676.6
Acinetobacter_baumannii	af	model_0762	-48560.2
Acinetobacter_baumannii	af	model_0763	-48314.8
Acinetobacter_baumannii	af	model_0764	-48343.9
Acinetobacter_baumannii	af	model_0765	-48722.3
Acinetobacter_baumannii	af	model_0766	-48431.3
Acinetobacter_baumannii	af	model_0767	-48513.1
Acinetobacter_baumannii	af	model_0768	-48041.8
Acinetobacter_baumannii	af	model_0769	-48502.3
Acinetobacter_baumannii	af	model_0770	-48723.2
Acinetobacter_baumannii	af	model_0771	-48274.3
Acinetobacter_baumannii	af	model_0772	-48054.8
Acinetobacter_baumannii	af	model_0773	-48596.5
Acinetobacter_baumannii	af	model_0774	-48473.9
Acinetobacter_baumannii	af	model_0775	-48650.4
Acinetobacter_baumannii	af	model_0776	-48927.3
Acinetobacter_baumannii	af	model_0777	-48678.6
Acinetobacter_baumannii	af	model_0778	-48660.5
Acinetobacter_baumannii	af	model_0779	-48388.1
Acinetobacter_baumannii	af	model_0780	-48048
Acinetobacter_baumannii	af	model_0781	-48634.7
Acinetobacter_baumannii	af	model_0782	-48597.9
Acinetobacter_baumannii	af	model_0783	-48791.8
Acinetobacter_baumannii	af	model_0784	-48646.1
Acinetobacter_baumannii	af	model_0785	-48445.5
Acinetobacter_baumannii	af	model_0786	-48346.5
Acinetobacter_baumannii	af	model_0787	-48255
Acinetobacter_baumannii	af	model_0788	-48504.2
Acinetobacter_baumannii	af	model_0789	-48416
Acinetobacter_baumannii	af	model_0790	-48050
Acinetobacter_baumannii	af	model_0791	-48456.2
Acinetobacter_baumannii	af	model_0792	-48587.9
Acinetobacter_baumannii	af	model_0793	-48273.2
Acinetobacter_baumannii	af	model_0794	-48448.3
Acinetobacter_baumannii	af	model_0795	-48539
Acinetobacter_baumannii	af	model_0796	-48228.4
Acinetobacter_baumannii	af	model_0797	-47807.8
Acinetobacter_baumannii	af	model_0798	-48528.3
Acinetobacter_baumannii	af	model_0799	-48574.6
Acinetobacter_baumannii	af	model_0800	-47838.5
Acinetobacter_baumannii	af	model_0801	-48653.4
Acinetobacter_baumannii	af	model_0802	-48479.7
Acinetobacter_baumannii	af	model_0803	-48833.1
Acinetobacter_baumannii	af	model_0804	-48609
Acinetobacter_baumannii	af	model_0805	-48703.5
Acinetobacter_baumannii	af	model_0806	-48347.8
Acinetobacter_baumannii	af	model_0807	-48540.1
Acinetobacter_baumannii	af	model_0808	-48747.3
Acinetobacter_baumannii	af	model_0809	-48369.7
Acinetobacter_baumannii	af	model_0810	-48692.5
Acinetobacter_baumannii	af	model_0811	-48786.2
Acinetobacter_baumannii	af	model_0812	-48483.4
Acinetobacter_baumannii	af	model_0813	-48310.2
Acinetobacter_baumannii	af	model_0814	-48146.9
Acinetobacter_baumannii	af	model_0815	-48432.6
Acinetobacter_baumannii	af	model_0816	-48597.8
Acinetobacter_baumannii	af	model_0817	-47757.3
Acinetobacter_baumannii	af	model_0818	-48239
Acinetobacter_baumannii	af	model_0819	-47888.2
Acinetobacter_baumannii	af	model_0820	-48199.8
Acinetobacter_baumannii	af	model_0821	-48391.4
Acinetobacter_baumannii	af	model_0822	-48248.1
Acinetobacter_baumannii	af	model_0823	-48215.3
Acinetobacter_baumannii	af	model_0824	-49111.8
Acinetobacter_baumannii	af	model_0825	-48114.4
Acinetobacter_baumannii	af	model_0826	-48632
Acinetobacter_baumannii	af	model_0827	-48244.4
Acinetobacter_baumannii	af	model_0828	-48388.3
Acinetobacter_baumannii	af	model_0829	-48306.1
Acinetobacter_baumannii	af	model_0830	-48652.9
Acinetobacter_baumannii	af	model_0831	-48588.4
Acinetobacter_baumannii	af	model_0832	-48053.6
Acinetobacter_baumannii	af	model_0833	-48582.4
Acinetobacter_baumannii	af	model_0834	-48474.8
Acinetobacter_baumannii	af	model_0835	-48186.6
Acinetobacter_baumannii	af	model_0836	-48588.2
Acinetobacter_baumannii	af	model_0837	-48348.6
Acinetobacter_baumannii	af	model_0838	-48379.3
Acinetobacter_baumannii	af	model_0839	-48194
Acinetobacter_baumannii	af	model_0840	-48258.7
Acinetobacter_baumannii	af	model_0841	-48660.9
Acinetobacter_baumannii	af	model_0842	-48382.5
Acinetobacter_baumannii	af	model_0843	-48461
Acinetobacter_baumannii	af	model_0844	-47979.4
Acinetobacter_baumannii	af	model_0845	-48295.6
Acinetobacter_baumannii	af	model_0846	-48508.7
Acinetobacter_baumannii	af	model_0847	-48421.6
Acinetobacter_baumannii	af	model_0848	-47826.9
Acinetobacter_baumannii	af	model_0849	-48249.1
Acinetobacter_baumannii	af	model_0850	-48779.7
Acinetobacter_baumannii	af	model_0851	-48432.8
Acinetobacter_baumannii	af	model_0852	-48618.8
Acinetobacter_baumannii	af	model_0853	-48555.7
Acinetobacter_baumannii	af	model_0854	-48501.6
Acinetobacter_baumannii	af	model_0855	-48589.1
Acinetobacter_baumannii	af	model_0856	-48265.4
Acinetobacter_baumannii	af	model_0857	-48172.9
Acinetobacter_baumannii	af	model_0858	-48473.3
Acinetobacter_baumannii	af	model_0859	-48608.2
Acinetobacter_baumannii	af	model_0860	-48531.4
Acinetobacter_baumannii	af	model_0861	-48879
Acinetobacter_baumannii	af	model_0862	-48212.2
Acinetobacter_baumannii	af	model_0863	-48344.3
Acinetobacter_baumannii	af	model_0864	-48516
Acinetobacter_baumannii	af	model_0865	-48444
Acinetobacter_baumannii	af	model_0866	-48673.6
Acinetobacter_baumannii	af	model_0867	-48239.7
Acinetobacter_baumannii	af	model_0868	-48467.4
Acinetobacter_baumannii	af	model_0869	-48523.9
Acinetobacter_baumannii	af	model_0870	-48513.2
Acinetobacter_baumannii	af	model_0871	-48357.5
Acinetobacter_baumannii	af	model_0872	-48217.2
Acinetobacter_baumannii	af	model_0873	-48414.1
Acinetobacter_baumannii	af	model_0874	-48668.3
Acinetobacter_baumannii	af	model_0875	-47848.1
Acinetobacter_baumannii	af	model_0876	-48318.5
Acinetobacter_baumannii	af	model_0877	-48442.7
Acinetobacter_baumannii	af	model_0878	-48626.9
Acinetobacter_baumannii	af	model_0879	-48135.3
Acinetobacter_baumannii	af	model_0880	-48159.1
Acinetobacter_baumannii	af	model_0881	-48570.5
Acinetobacter_baumannii	af	model_0882	-48447.8
Acinetobacter_baumannii	af	model_0883	-47564.9
Acinetobacter_baumannii	af	model_0884	-48288.4
Acinetobacter_baumannii	af	model_0885	-48391.8
Acinetobacter_baumannii	af	model_0886	-48533
Acinetobacter_baumannii	af	model_0887	-48492.3
Acinetobacter_baumannii	af	model_0888	-48435.1
Acinetobacter_baumannii	af	model_0889	-48530.2
Acinetobacter_baumannii	af	model_0890	-48023.8
Acinetobacter_baumannii	af	model_0891	-48100.7
Acinetobacter_baumannii	af	model_0892	-48349.2
Acinetobacter_baumannii	af	model_0893	-48048.9
Acinetobacter_baumannii	af	model_0894	-48104.8
Acinetobacter_baumannii	af	model_0895	-48614.9
Acinetobacter_baumannii	af	model_0896	-48566.3
Acinetobacter_baumannii	af	model_0897	-48541.8
Acinetobacter_baumannii	af	model_0898	-48351.7
Acinetobacter_baumannii	af	model_0899	-48344.9
Acinetobacter_baumannii	af	model_0900	-48141.5
Acinetobacter_baumannii	af	model_0901	-48262
Acinetobacter_baumannii	af	model_0902	-48468.6
Acinetobacter_baumannii	af	model_0903	-48255.6
Acinetobacter_baumannii	af	model_0904	-48821.4
Acinetobacter_baumannii	af	model_0905	-48639.7
Acinetobacter_baumannii	af	model_0906	-48377.7
Acinetobacter_baumannii	af	model_0907	-48126.6
Acinetobacter_baumannii	af	model_0908	-48465.5
Acinetobacter_baumannii	af	model_0909	-48391.5
Acinetobacter_baumannii	af	model_0910	-48861.4
Acinetobacter_baumannii	af	model_0911	-48231.6
Acinetobacter_baumannii	af	model_0912	-48904.6
Acinetobacter_baumannii	af	model_0913	-48430.5
Acinetobacter_baumannii	af	model_0914	-48795.9
Acinetobacter_baumannii	af	model_0915	-48428.8
Acinetobacter_baumannii	af	model_0916	-48464.1
Acinetobacter_baumannii	af	model_0917	-48318.2
Acinetobacter_baumannii	af	model_0918	-48535.3
Acinetobacter_baumannii	af	model_0919	-48286.9
Acinetobacter_baumannii	af	model_0920	-48070.7
Acinetobacter_baumannii	af	model_0921	-48964.4
Acinetobacter_baumannii	af	model_0922	-48543
Acinetobacter_baumannii	af	model_0923	-48296.7
Acinetobacter_baumannii	af	model_0924	-48460.4
Acinetobacter_baumannii	af	model_0925	-48999.2
Acinetobacter_baumannii	af	model_0926	-48286
Acinetobacter_baumannii	af	model_0927	-48081
Acinetobacter_baumannii	af	model_0928	-48366.9
Acinetobacter_baumannii	af	model_0929	-47974.3
Acinetobacter_baumannii	af	model_0930	-48371.6
Acinetobacter_baumannii	af	model_0931	-48678.5
Acinetobacter_baumannii	af	model_0932	-47875.6
Acinetobacter_baumannii	af	model_0933	-48429.7
Acinetobacter_baumannii	af	model_0934	-48211.1
Acinetobacter_baumannii	af	model_0935	-48508
Acinetobacter_baumannii	af	model_0936	-48115.7
Acinetobacter_baumannii	af	model_0937	-48370.2
Acinetobacter_baumannii	af	model_0938	-48727.1
Acinetobacter_baumannii	af	model_0939	-48757.9
Acinetobacter_baumannii	af	model_0940	-48167.6
Acinetobacter_baumannii	af	model_0941	-48022.3
Acinetobacter_baumannii	af	model_0942	-47999.9
Acinetobacter_baumannii	af	model_0943	-48178.6
Acinetobacter_baumannii	af	model_0944	-48525.8
Acinetobacter_baumannii	af	model_0945	-48100.1
Acinetobacter_baumannii	af	model_0946	-48266.4
Acinetobacter_baumannii	af	model_0947	-48580.1
Acinetobacter_baumannii	af	model_0948	-48357.7
Acinetobacter_baumannii	af	model_0949	-48500
Acinetobacter_baumannii	af	model_0950	-48007.7
Acinetobacter_baumannii	af	model_0951	-48884.2
Acinetobacter_baumannii	af	model_0952	-48528.3
Acinetobacter_baumannii	af	model_0953	-48320.3
Acinetobacter_baumannii	af	model_0954	-48403.9
Acinetobacter_baumannii	af	model_0955	-48628.1
Acinetobacter_baumannii	af	model_0956	-48408.1
Acinetobacter_baumannii	af	model_0957	-48709.3
Acinetobacter_baumannii	af	model_0958	-48705.3
Acinetobacter_baumannii	af	model_0959	-48279.1
Acinetobacter_baumannii	af	model_0960	-48422.6
Acinetobacter_baumannii	af	model_0961	-48766.1
Acinetobacter_baumannii	af	model_0962	-48638.9
Acinetobacter_baumannii	af	model_0963	-48307.7
Acinetobacter_baumannii	af	model_0964	-48641.4
Acinetobacter_baumannii	af	model_0965	-48381.6
Acinetobacter_baumannii	af	model_0966	-48556.3
Acinetobacter_baumannii	af	model_0967	-48586.7
Acinetobacter_baumannii	af	model_0968	-48198.3
Acinetobacter_baumannii	af	model_0969	-48372.9
Acinetobacter_baumannii	af	model_0970	-48461.7
Acinetobacter_baumannii	af	model_0971	-48094.5
Acinetobacter_baumannii	af	model_0972	-48355.4
Acinetobacter_baumannii	af	model_0973	-47845.3
Acinetobacter_baumannii	af	model_0974	-48371.7
Acinetobacter_baumannii	af	model_0975	-47885.5
Acinetobacter_baumannii	af	model_0976	-47932.4
Acinetobacter_baumannii	af	model_0977	-48117.6
Acinetobacter_baumannii	af	model_0978	-48258.2
Acinetobacter_baumannii	af	model_0979	-48525.8
Acinetobacter_baumannii	af	model_0980	-48281.4
Acinetobacter_baumannii	af	model_0981	-48580.9
Acinetobacter_baumannii	af	model_0982	-48433.1
Acinetobacter_baumannii	af	model_0983	-48123.2
Acinetobacter_baumannii	af	model_0984	-48752.3
Acinetobacter_baumannii	af	model_0985	-47960.8
Acinetobacter_baumannii	af	model_0986	-48767.8
Acinetobacter_baumannii	af	model_0987	-48380.5
Acinetobacter_baumannii	af	model_0988	-48502.5
Acinetobacter_baumannii	af	model_0989	-48286.6
Acinetobacter_baumannii	af	model_0990	-48760
Acinetobacter_baumannii	af	model_0991	-48603.1
Acinetobacter_baumannii	af	model_0992	-48506.9
Acinetobacter_baumannii	af	model_0993	-48113.7
Acinetobacter_baumannii	af	model_0994	-48431.9
Acinetobacter_baumannii	af	model_0995	-48528.9
Acinetobacter_baumannii	af	model_0996	-48358
Acinetobacter_baumannii	af	model_0997	-48628.9
[truncated: 10,043 more rows]

## Sheet: (B) AutodockFR
(B) The binding energy (affinity) between the ATP and all generated models using AutodockFR
* The lower binding energy indicate the better binding against the targeted protein
Organism	Template	Model_ID	Ligand	Mode	Affinity_(kcal/mol)	Clust_rmsd
Acinetobacter_baumannii	4biw	model_0001	atp	1	-7.8	0
Acinetobacter_baumannii	4biw	model_0001	atp	2	-6.6	2.5
Acinetobacter_baumannii	4biw	model_0001	atp	3	-6.5	2.1
Acinetobacter_baumannii	4biw	model_0001	atp	4	-6.2	6.5
Acinetobacter_baumannii	4biw	model_0001	atp	5	-6.1	7.7
Acinetobacter_baumannii	4biw	model_0001	atp	6	-5.6	8.6
Acinetobacter_baumannii	4biw	model_0001	atp	7	-5.6	7.3
Acinetobacter_baumannii	4biw	model_0001	atp	8	-5.5	4.6
Acinetobacter_baumannii	4biw	model_0001	atp	9	-5.3	3.3
Acinetobacter_baumannii	4biw	model_0001	atp	10	-5.1	7.8
Acinetobacter_baumannii	4biw	model_0001	atp	11	-4.7	6.9
Acinetobacter_baumannii	4biw	model_0001	atp	12	-4.2	6.3
Acinetobacter_baumannii	4biw	model_0001	atp	13	-4.2	7.9
Acinetobacter_baumannii	4biw	model_0001	atp	14	-3.6	8.9
Acinetobacter_baumannii	4biw	model_0002	atp	1	-8.1	0
Acinetobacter_baumannii	4biw	model_0002	atp	2	-6.7	4.6
Acinetobacter_baumannii	4biw	model_0002	atp	3	-6.6	4.3
Acinetobacter_baumannii	4biw	model_0002	atp	4	-6.3	2.5
Acinetobacter_baumannii	4biw	model_0002	atp	5	-6	2
Acinetobacter_baumannii	4biw	model_0002	atp	6	-4.8	6.5
Acinetobacter_baumannii	4biw	model_0002	atp	7	-4.6	2.4
Acinetobacter_baumannii	4biw	model_0002	atp	8	-4.3	3.4
Acinetobacter_baumannii	4biw	model_0002	atp	9	-4.3	7.3
Acinetobacter_baumannii	4biw	model_0002	atp	10	-4.1	3.3
Acinetobacter_baumannii	4biw	model_0002	atp	11	-3.8	8.3
Acinetobacter_baumannii	4biw	model_0002	atp	12	-3	4.9
Acinetobacter_baumannii	4biw	model_0002	atp	13	-2.7	6.7
Acinetobacter_baumannii	4biw	model_0003	atp	1	-7.2	0
Acinetobacter_baumannii	4biw	model_0003	atp	2	-7.1	2.5
Acinetobacter_baumannii	4biw	model_0003	atp	3	-6.7	4
Acinetobacter_baumannii	4biw	model_0003	atp	4	-6.1	2.4
Acinetobacter_baumannii	4biw	model_0003	atp	5	-6	7.4
Acinetobacter_baumannii	4biw	model_0003	atp	6	-5.9	3.9
Acinetobacter_baumannii	4biw	model_0003	atp	7	-5.9	3.3
Acinetobacter_baumannii	4biw	model_0003	atp	8	-5.7	5
Acinetobacter_baumannii	4biw	model_0003	atp	9	-5.4	9
Acinetobacter_baumannii	4biw	model_0003	atp	10	-4.9	8.4
Acinetobacter_baumannii	4biw	model_0003	atp	11	-4.7	6.7
Acinetobacter_baumannii	4biw	model_0003	atp	12	-4.5	4.5
Acinetobacter_baumannii	4biw	model_0003	atp	13	-4	7.6
Acinetobacter_baumannii	4biw	model_0004	atp	1	-8.6	0
Acinetobacter_baumannii	4biw	model_0004	atp	2	-8.2	3.1
Acinetobacter_baumannii	4biw	model_0004	atp	3	-8.1	2.7
Acinetobacter_baumannii	4biw	model_0004	atp	4	-7.9	2.3
Acinetobacter_baumannii	4biw	model_0004	atp	5	-7.7	2
Acinetobacter_baumannii	4biw	model_0004	atp	6	-3.9	6.1
Acinetobacter_baumannii	4biw	model_0005	atp	1	-7.9	0
Acinetobacter_baumannii	4biw	model_0005	atp	2	-7.6	4.8
Acinetobacter_baumannii	4biw	model_0005	atp	3	-6.8	2.3
Acinetobacter_baumannii	4biw	model_0005	atp	4	-6.7	2.7
Acinetobacter_baumannii	4biw	model_0005	atp	5	-6	2.1
Acinetobacter_baumannii	4biw	model_0005	atp	6	-5.8	2.7
Acinetobacter_baumannii	4biw	model_0005	atp	7	-5.7	2.9
Acinetobacter_baumannii	4biw	model_0005	atp	8	-5.2	4.6
Acinetobacter_baumannii	4biw	model_0005	atp	9	-4.8	6.4
Acinetobacter_baumannii	4biw	model_0006	atp	1	-7.1	0
Acinetobacter_baumannii	4biw	model_0006	atp	2	-7	3.7
Acinetobacter_baumannii	4biw	model_0006	atp	3	-6.5	2.6
Acinetobacter_baumannii	4biw	model_0006	atp	4	-6.5	2.1
Acinetobacter_baumannii	4biw	model_0006	atp	5	-5.7	3.7
Acinetobacter_baumannii	4biw	model_0006	atp	6	-5.7	3.2
Acinetobacter_baumannii	4biw	model_0006	atp	7	-4.9	2.6
Acinetobacter_baumannii	4biw	model_0006	atp	8	-3.6	7.2
Acinetobacter_baumannii	4biw	model_0007	atp	1	-7.4	0
Acinetobacter_baumannii	4biw	model_0007	atp	2	-5.9	3.3
Acinetobacter_baumannii	4biw	model_0007	atp	3	-5.9	3.4
Acinetobacter_baumannii	4biw	model_0007	atp	4	-5.9	2.4
Acinetobacter_baumannii	4biw	model_0007	atp	5	-5.4	2.5
Acinetobacter_baumannii	4biw	model_0007	atp	6	-5.4	4.6
Acinetobacter_baumannii	4biw	model_0007	atp	7	-5	6.9
Acinetobacter_baumannii	4biw	model_0007	atp	8	-5	5.7
Acinetobacter_baumannii	4biw	model_0007	atp	9	-4.6	7.5
Acinetobacter_baumannii	4biw	model_0007	atp	10	-4.4	3.4
Acinetobacter_baumannii	4biw	model_0008	atp	1	-7.9	0
Acinetobacter_baumannii	4biw	model_0008	atp	2	-7.3	2.3
Acinetobacter_baumannii	4biw	model_0008	atp	3	-6.9	3.2
Acinetobacter_baumannii	4biw	model_0008	atp	4	-6.5	2.6
Acinetobacter_baumannii	4biw	model_0008	atp	5	-5.5	2.5
Acinetobacter_baumannii	4biw	model_0008	atp	6	-5.4	3.2
Acinetobacter_baumannii	4biw	model_0008	atp	7	-4.7	2.4
Acinetobacter_baumannii	4biw	model_0008	atp	8	-4.2	6.4
Acinetobacter_baumannii	4biw	model_0008	atp	9	-4.1	7.9
Acinetobacter_baumannii	4biw	model_0008	atp	10	-3.8	9.1
Acinetobacter_baumannii	4biw	model_0009	atp	1	-5.8	0
Acinetobacter_baumannii	4biw	model_0009	atp	2	-5.2	3.7
Acinetobacter_baumannii	4biw	model_0009	atp	3	-4.9	3.3
Acinetobacter_baumannii	4biw	model_0009	atp	4	-4.9	4.2
Acinetobacter_baumannii	4biw	model_0009	atp	5	-4.7	2.3
Acinetobacter_baumannii	4biw	model_0009	atp	6	-4.7	3.1
Acinetobacter_baumannii	4biw	model_0009	atp	7	-4.1	2.9
Acinetobacter_baumannii	4biw	model_0009	atp	8	-4.1	3.7
Acinetobacter_baumannii	4biw	model_0009	atp	9	-3.9	4.6
Acinetobacter_baumannii	4biw	model_0009	atp	10	-3.7	4.8
Acinetobacter_baumannii	4biw	model_0009	atp	11	-3.3	5.1
Acinetobacter_baumannii	4biw	model_0009	atp	12	-3.3	6.5
Acinetobacter_baumannii	4biw	model_0009	atp	13	-3.2	5.8
Acinetobacter_baumannii	4biw	model_0009	atp	14	-3.1	4.9
Acinetobacter_baumannii	4biw	model_0009	atp	15	-2.8	3.6
Acinetobacter_baumannii	4biw	model_0009	atp	16	-2.6	6.3
Acinetobacter_baumannii	4biw	model_0009	atp	17	-2.3	6.4
Acinetobacter_baumannii	4biw	model_0009	atp	18	-2.1	5
Acinetobacter_baumannii	4biw	model_0009	atp	19	-1.9	6.4
Acinetobacter_baumannii	4biw	model_0009	atp	20	-1.9	7.1
Acinetobacter_baumannii	4biw	model_0009	atp	21	-1.7	5.3
Acinetobacter_baumannii	4biw	model_0009	atp	22	-1.7	5.9
Acinetobacter_baumannii	4biw	model_0009	atp	23	-1.4	6
Acinetobacter_baumannii	4biw	model_0009	atp	24	-1.4	6.7
Acinetobacter_baumannii	4biw	model_0009	atp	25	-1.2	8.1
Acinetobacter_baumannii	4biw	model_0009	atp	26	-1	6.5
Acinetobacter_baumannii	4biw	model_0009	atp	27	0	6.5
Acinetobacter_baumannii	4biw	model_0009	atp	28	3.7	8.2
Acinetobacter_baumannii	4biw	model_0010	atp	1	-7.6	0
Acinetobacter_baumannii	4biw	model_0010	atp	2	-7.3	3.5
Acinetobacter_baumannii	4biw	model_0010	atp	3	-7.2	2.7
Acinetobacter_baumannii	4biw	model_0010	atp	4	-7.1	2.6
Acinetobacter_baumannii	4biw	model_0010	atp	5	-6.9	3.4
Acinetobacter_baumannii	4biw	model_0010	atp	6	-6.6	2.8
Acinetobacter_baumannii	4biw	model_0010	atp	7	-6.5	2
Acinetobacter_baumannii	4biw	model_0010	atp	8	-6.1	2.4
Acinetobacter_baumannii	4biw	model_0010	atp	9	-5.8	4
Acinetobacter_baumannii	4biw	model_0010	atp	10	-5.5	3.4
Acinetobacter_baumannii	4biw	model_0010	atp	11	-4.8	4
Acinetobacter_baumannii	4biw	model_0010	atp	12	-3.4	4.3
Acinetobacter_baumannii	4biw	model_0010	atp	13	-2.9	8.5
Acinetobacter_baumannii	4biw	model_0011	atp	1	-9.6	0
Acinetobacter_baumannii	4biw	model_0011	atp	2	-9.4	2.5
Acinetobacter_baumannii	4biw	model_0011	atp	3	-8.8	2.7
Acinetobacter_baumannii	4biw	model_0011	atp	4	-8.7	3
Acinetobacter_baumannii	4biw	model_0011	atp	5	-8.4	3.1
Acinetobacter_baumannii	4biw	model_0011	atp	6	-7.9	3.3
Acinetobacter_baumannii	4biw	model_0011	atp	7	-7.8	4.5
Acinetobacter_baumannii	4biw	model_0011	atp	8	-7.6	2.4
Acinetobacter_baumannii	4biw	model_0011	atp	9	-7.3	2
Acinetobacter_baumannii	4biw	model_0011	atp	10	-5.4	3.5
Acinetobacter_baumannii	4biw	model_0012	atp	1	-7	0
Acinetobacter_baumannii	4biw	model_0012	atp	2	-6.9	6.6
Acinetobacter_baumannii	4biw	model_0012	atp	3	-6.4	7.3
Acinetobacter_baumannii	4biw	model_0012	atp	4	-6.1	7.2
Acinetobacter_baumannii	4biw	model_0012	atp	5	-5.6	6.7
Acinetobacter_baumannii	4biw	model_0012	atp	6	-5.5	7.2
Acinetobacter_baumannii	4biw	model_0012	atp	7	-5.4	7.3
Acinetobacter_baumannii	4biw	model_0012	atp	8	-5.3	3.7
Acinetobacter_baumannii	4biw	model_0012	atp	9	-5	6.8
Acinetobacter_baumannii	4biw	model_0012	atp	10	-4.8	7.6
Acinetobacter_baumannii	4biw	model_0012	atp	11	-4.5	7.2
Acinetobacter_baumannii	4biw	model_0012	atp	12	-4.3	7.2
Acinetobacter_baumannii	4biw	model_0012	atp	13	-4.1	4.7
Acinetobacter_baumannii	4biw	model_0012	atp	14	-3.9	7.8
Acinetobacter_baumannii	4biw	model_0012	atp	15	-3.7	3.6
Acinetobacter_baumannii	4biw	model_0012	atp	16	-2.1	6.9
Acinetobacter_baumannii	4biw	model_0013	atp	1	-7.7	0
Acinetobacter_baumannii	4biw	model_0013	atp	2	-7.7	2.7
Acinetobacter_baumannii	4biw	model_0013	atp	3	-7.3	4.2
Acinetobacter_baumannii	4biw	model_0013	atp	4	-7.2	2.4
Acinetobacter_baumannii	4biw	model_0013	atp	5	-6.8	2.1
Acinetobacter_baumannii	4biw	model_0013	atp	6	-6.5	3.5
Acinetobacter_baumannii	4biw	model_0013	atp	7	-6	5.5
Acinetobacter_baumannii	4biw	model_0013	atp	8	-5.2	3.2
Acinetobacter_baumannii	4biw	model_0013	atp	9	-4.8	4.8
Acinetobacter_baumannii	4biw	model_0013	atp	10	-4	3.6
Acinetobacter_baumannii	4biw	model_0013	atp	11	-3.1	6.6
Acinetobacter_baumannii	4biw	model_0014	atp	1	-7.3	0
Acinetobacter_baumannii	4biw	model_0014	atp	2	-6.8	3.3
Acinetobacter_baumannii	4biw	model_0014	atp	3	-6.7	2.9
Acinetobacter_baumannii	4biw	model_0014	atp	4	-6.6	2.1
Acinetobacter_baumannii	4biw	model_0014	atp	5	-6.5	7.9
Acinetobacter_baumannii	4biw	model_0014	atp	6	-6.3	5.5
Acinetobacter_baumannii	4biw	model_0014	atp	7	-6	4.1
Acinetobacter_baumannii	4biw	model_0014	atp	8	-5.9	2.3
Acinetobacter_baumannii	4biw	model_0014	atp	9	-5.8	4.8
Acinetobacter_baumannii	4biw	model_0014	atp	10	-5.2	2.6
Acinetobacter_baumannii	4biw	model_0014	atp	11	-4.9	7.4
Acinetobacter_baumannii	4biw	model_0014	atp	12	-4.7	2.7
Acinetobacter_baumannii	4biw	model_0014	atp	13	-4.6	4.4
Acinetobacter_baumannii	4biw	model_0014	atp	14	-4.3	2.4
Acinetobacter_baumannii	4biw	model_0014	atp	15	-3.3	4.7
Acinetobacter_baumannii	4biw	model_0015	atp	1	-7.4	0
Acinetobacter_baumannii	4biw	model_0015	atp	2	-7.1	4.2
Acinetobacter_baumannii	4biw	model_0015	atp	3	-6.4	4.4
Acinetobacter_baumannii	4biw	model_0015	atp	4	-6.3	5.6
Acinetobacter_baumannii	4biw	model_0015	atp	5	-6.2	4.1
Acinetobacter_baumannii	4biw	model_0015	atp	6	-5.8	3.8
Acinetobacter_baumannii	4biw	model_0015	atp	7	-5.3	4.8
Acinetobacter_baumannii	4biw	model_0015	atp	8	-4.5	3.6
Acinetobacter_baumannii	4biw	model_0015	atp	9	-4.4	4.3
Acinetobacter_baumannii	4biw	model_0015	atp	10	-4.3	2.4
Acinetobacter_baumannii	4biw	model_0015	atp	11	-3.1	3.8
Acinetobacter_baumannii	4biw	model_0015	atp	12	-2.8	7.1
Acinetobacter_baumannii	4biw	model_0015	atp	13	-2.7	6.5
Acinetobacter_baumannii	4biw	model_0016	atp	1	-6.5	0
Acinetobacter_baumannii	4biw	model_0016	atp	2	-6.1	6.2
Acinetobacter_baumannii	4biw	model_0016	atp	3	-6.1	7.1
Acinetobacter_baumannii	4biw	model_0016	atp	4	-5.6	2.5
Acinetobacter_baumannii	4biw	model_0016	atp	5	-5.5	2.5
Acinetobacter_baumannii	4biw	model_0016	atp	6	-5.5	7.6
Acinetobacter_baumannii	4biw	model_0016	atp	7	-4.8	3.3
Acinetobacter_baumannii	4biw	model_0016	atp	8	-4.6	2.1
Acinetobacter_baumannii	4biw	model_0016	atp	9	-4	7.9
Acinetobacter_baumannii	4biw	model_0016	atp	10	-4	7.6
Acinetobacter_baumannii	4biw	model_0016	atp	11	-3.8	4.2
Acinetobacter_baumannii	4biw	model_0016	atp	12	-3.4	7.6
Acinetobacter_baumannii	4biw	model_0016	atp	13	-3.2	3.7
Acinetobacter_baumannii	4biw	model_0017	atp	1	-7.6	0
Acinetobacter_baumannii	4biw	model_0017	atp	2	-7.1	2.2
Acinetobacter_baumannii	4biw	model_0017	atp	3	-7.1	4.4
Acinetobacter_baumannii	4biw	model_0017	atp	4	-6.8	2.9
Acinetobacter_baumannii	4biw	model_0017	atp	5	-6.4	2.8
Acinetobacter_baumannii	4biw	model_0017	atp	6	-6.2	3
Acinetobacter_baumannii	4biw	model_0017	atp	7	-6.1	3.3
Acinetobacter_baumannii	4biw	model_0017	atp	8	-6	2.9
Acinetobacter_baumannii	4biw	model_0017	atp	9	-6	5.2
Acinetobacter_baumannii	4biw	model_0017	atp	10	-5.8	3.6
Acinetobacter_baumannii	4biw	model_0017	atp	11	-5.1	4.1
Acinetobacter_baumannii	4biw	model_0017	atp	12	-4.8	2.7
Acinetobacter_baumannii	4biw	model_0017	atp	13	-3.4	3.8
Acinetobacter_baumannii	4biw	model_0018	atp	1	-8.7	0
Acinetobacter_baumannii	4biw	model_0018	atp	2	-8.6	2.1
Acinetobacter_baumannii	4biw	model_0018	atp	3	-8.2	4.6
Acinetobacter_baumannii	4biw	model_0018	atp	4	-8.1	2.9
Acinetobacter_baumannii	4biw	model_0018	atp	5	-7.8	3.6
Acinetobacter_baumannii	4biw	model_0018	atp	6	-6.4	3.5
Acinetobacter_baumannii	4biw	model_0018	atp	7	-4.3	6.8
Acinetobacter_baumannii	4biw	model_0018	atp	8	-3.6	6.5
Acinetobacter_baumannii	4biw	model_0019	atp	1	-7.6	0
Acinetobacter_baumannii	4biw	model_0019	atp	2	-7.5	3.1
Acinetobacter_baumannii	4biw	model_0019	atp	3	-6.6	3.8
Acinetobacter_baumannii	4biw	model_0019	atp	4	-6.6	2.2
Acinetobacter_baumannii	4biw	model_0019	atp	5	-6.6	2.3
Acinetobacter_baumannii	4biw	model_0019	atp	6	-6.2	2.1
Acinetobacter_baumannii	4biw	model_0019	atp	7	-5.4	6.1
Acinetobacter_baumannii	4biw	model_0019	atp	8	-4.7	6.5
Acinetobacter_baumannii	4biw	model_0019	atp	9	-4.3	5.9
Acinetobacter_baumannii	4biw	model_0019	atp	10	-4.2	6.2
Acinetobacter_baumannii	4biw	model_0019	atp	11	-4	3.4
Acinetobacter_baumannii	4biw	model_0019	atp	12	-3.7	4.9
Acinetobacter_baumannii	4biw	model_0019	atp	13	-3.3	4.8
Acinetobacter_baumannii	4biw	model_0019	atp	14	-3.2	7.7
Acinetobacter_baumannii	4biw	model_0020	atp	1	-9.3	0
Acinetobacter_baumannii	4biw	model_0020	atp	2	-9.1	2
Acinetobacter_baumannii	4biw	model_0020	atp	3	-8.8	2
Acinetobacter_baumannii	4biw	model_0020	atp	4	-8.4	4.5
Acinetobacter_baumannii	4biw	model_0020	atp	5	-7.7	3.1
Acinetobacter_baumannii	4biw	model_0020	atp	6	-7.6	2.3
Acinetobacter_baumannii	4biw	model_0020	atp	7	-7.2	4
Acinetobacter_baumannii	4biw	model_0020	atp	8	-6.2	8.3
Acinetobacter_baumannii	4biw	model_0020	atp	9	-5.2	7.4
Acinetobacter_baumannii	4biw	model_0020	atp	10	-4.7	2.8
Acinetobacter_baumannii	4biw	model_0021	atp	1	-8.2	0
Acinetobacter_baumannii	4biw	model_0021	atp	2	-7.7	2.6
Acinetobacter_baumannii	4biw	model_0021	atp	3	-7.5	3.5
Acinetobacter_baumannii	4biw	model_0021	atp	4	-7.5	2.1
Acinetobacter_baumannii	4biw	model_0021	atp	5	-6.9	2.1
Acinetobacter_baumannii	4biw	model_0021	atp	6	-6.9	3.3
Acinetobacter_baumannii	4biw	model_0021	atp	7	-6.7	2.6
Acinetobacter_baumannii	4biw	model_0021	atp	8	-6.4	3.6
Acinetobacter_baumannii	4biw	model_0021	atp	9	-6.3	3.8
Acinetobacter_baumannii	4biw	model_0021	atp	10	-6.2	2.2
Acinetobacter_baumannii	4biw	model_0021	atp	11	-4.4	7.4
Acinetobacter_baumannii	4biw	model_0022	atp	1	-7.6	0
Acinetobacter_baumannii	4biw	model_0022	atp	2	-7.2	4.1
Acinetobacter_baumannii	4biw	model_0022	atp	3	-6.9	3.6
Acinetobacter_baumannii	4biw	model_0022	atp	4	-6.2	4.1
Acinetobacter_baumannii	4biw	model_0022	atp	5	-5.7	3.8
Acinetobacter_baumannii	4biw	model_0022	atp	6	-5.6	2.1
Acinetobacter_baumannii	4biw	model_0022	atp	7	-5.6	2.2
Acinetobacter_baumannii	4biw	model_0022	atp	8	-4.9	3.5
Acinetobacter_baumannii	4biw	model_0022	atp	9	-4.5	5.4
Acinetobacter_baumannii	4biw	model_0022	atp	10	-1.4	6.9
Acinetobacter_baumannii	4biw	model_0023	atp	1	-7.7	0
Acinetobacter_baumannii	4biw	model_0023	atp	2	-7	2
Acinetobacter_baumannii	4biw	model_0023	atp	3	-6.9	3
Acinetobacter_baumannii	4biw	model_0023	atp	4	-6.6	3.5
Acinetobacter_baumannii	4biw	model_0023	atp	5	-5.7	4.5
Acinetobacter_baumannii	4biw	model_0023	atp	6	-5.7	2.7
Acinetobacter_baumannii	4biw	model_0023	atp	7	-5.6	5
Acinetobacter_baumannii	4biw	model_0023	atp	8	-4.9	8
Acinetobacter_baumannii	4biw	model_0023	atp	9	-4.5	7.7
Acinetobacter_baumannii	4biw	model_0023	atp	10	-4.3	5.2
Acinetobacter_baumannii	4biw	model_0023	atp	11	-4	6.8
Acinetobacter_baumannii	4biw	model_0023	atp	12	-3.5	7
Acinetobacter_baumannii	4biw	model_0024	atp	1	-7.8	0
Acinetobacter_baumannii	4biw	model_0024	atp	2	-7.3	2.2
Acinetobacter_baumannii	4biw	model_0024	atp	3	-7.2	2.8
Acinetobacter_baumannii	4biw	model_0024	atp	4	-6.9	2.2
Acinetobacter_baumannii	4biw	model_0024	atp	5	-6.9	2.8
Acinetobacter_baumannii	4biw	model_0024	atp	6	-6.5	2.7
Acinetobacter_baumannii	4biw	model_0024	atp	7	-5.8	6.5
Acinetobacter_baumannii	4biw	model_0024	atp	8	-4.8	4.5
Acinetobacter_baumannii	4biw	model_0024	atp	9	-4.4	5
Acinetobacter_baumannii	4biw	model_0024	atp	10	-3.8	7.7
Acinetobacter_baumannii	4biw	model_0025	atp	1	-7.6	0
Acinetobacter_baumannii	4biw	model_0025	atp	2	-7.5	6.6
Acinetobacter_baumannii	4biw	model_0025	atp	3	-7.2	6.6
Acinetobacter_baumannii	4biw	model_0025	atp	4	-7	6.4
Acinetobacter_baumannii	4biw	model_0025	atp	5	-6.9	6.7
Acinetobacter_baumannii	4biw	model_0025	atp	6	-6.8	4.5
Acinetobacter_baumannii	4biw	model_0025	atp	7	-6.6	4.4
Acinetobacter_baumannii	4biw	model_0025	atp	8	-6.6	6.8
Acinetobacter_baumannii	4biw	model_0025	atp	9	-6.6	6.4
Acinetobacter_baumannii	4biw	model_0025	atp	10	-6.3	4
Acinetobacter_baumannii	4biw	model_0025	atp	11	-6.3	4.9
Acinetobacter_baumannii	4biw	model_0025	atp	12	-6.3	6.7
Acinetobacter_baumannii	4biw	model_0025	atp	13	-6.2	3.8
Acinetobacter_baumannii	4biw	model_0025	atp	14	-5.9	3.7
Acinetobacter_baumannii	4biw	model_0025	atp	15	-5.8	7.7
Acinetobacter_baumannii	4biw	model_0025	atp	16	-5.6	7.2
Acinetobacter_baumannii	4biw	model_0025	atp	17	-5.4	7.4
Acinetobacter_baumannii	4biw	model_0025	atp	18	-4.1	7.1
Acinetobacter_baumannii	4biw	model_0025	atp	19	-3.8	4
Acinetobacter_baumannii	4biw	model_0026	atp	1	-8.5	0
Acinetobacter_baumannii	4biw	model_0026	atp	2	-8	2
Acinetobacter_baumannii	4biw	model_0026	atp	3	-7.9	3.2
Acinetobacter_baumannii	4biw	model_0026	atp	4	-7.9	2.1
Acinetobacter_baumannii	4biw	model_0026	atp	5	-7.6	3.5
Acinetobacter_baumannii	4biw	model_0026	atp	6	-7.4	2
Acinetobacter_baumannii	4biw	model_0026	atp	7	-7.2	3
Acinetobacter_baumannii	4biw	model_0026	atp	8	-6.9	2.5
Acinetobacter_baumannii	4biw	model_0026	atp	9	-6.3	2
Acinetobacter_baumannii	4biw	model_0026	atp	10	-5.9	3.8
Acinetobacter_baumannii	4biw	model_0027	atp	1	-8.1	0
Acinetobacter_baumannii	4biw	model_0027	atp	2	-8	2.1
Acinetobacter_baumannii	4biw	model_0027	atp	3	-7.3	3.2
Acinetobacter_baumannii	4biw	model_0027	atp	4	-6.7	3.6
Acinetobacter_baumannii	4biw	model_0027	atp	5	-6.4	2
Acinetobacter_baumannii	4biw	model_0027	atp	6	-6.1	3.2
Acinetobacter_baumannii	4biw	model_0027	atp	7	-5.4	2
Acinetobacter_baumannii	4biw	model_0027	atp	8	-4.6	6.1
Acinetobacter_baumannii	4biw	model_0027	atp	9	-4.6	8
Acinetobacter_baumannii	4biw	model_0027	atp	10	-4.4	8.3
Acinetobacter_baumannii	4biw	model_0027	atp	11	-4.1	8
Acinetobacter_baumannii	4biw	model_0028	atp	1	-8	0
Acinetobacter_baumannii	4biw	model_0028	atp	2	-7.5	2.6
Acinetobacter_baumannii	4biw	model_0028	atp	3	-6.1	8.3
Acinetobacter_baumannii	4biw	model_0028	atp	4	-6	3
Acinetobacter_baumannii	4biw	model_0028	atp	5	-5.8	6.1
Acinetobacter_baumannii	4biw	model_0028	atp	6	-4.8	7.8
Acinetobacter_baumannii	4biw	model_0028	atp	7	-4.7	4.8
Acinetobacter_baumannii	4biw	model_0028	atp	8	-4.5	6.8
Acinetobacter_baumannii	4biw	model_0029	atp	1	-7.5	0
Acinetobacter_baumannii	4biw	model_0029	atp	2	-6.6	2.2
Acinetobacter_baumannii	4biw	model_0029	atp	3	-6.2	2.4
Acinetobacter_baumannii	4biw	model_0029	atp	4	-6.1	3.3
Acinetobacter_baumannii	4biw	model_0029	atp	5	-6	2.5
Acinetobacter_baumannii	4biw	model_0029	atp	6	-6	2.5
Acinetobacter_baumannii	4biw	model_0029	atp	7	-5.4	3.8
Acinetobacter_baumannii	4biw	model_0029	atp	8	-5.3	7
Acinetobacter_baumannii	4biw	model_0029	atp	9	-5.2	4.6
Acinetobacter_baumannii	4biw	model_0029	atp	10	-3.9	3.7
Acinetobacter_baumannii	4biw	model_0029	atp	11	-3.8	6.5
Acinetobacter_baumannii	4biw	model_0029	atp	12	-3.6	6.6
Acinetobacter_baumannii	4biw	model_0030	atp	1	-8	0
Acinetobacter_baumannii	4biw	model_0030	atp	2	-7.1	3.3
Acinetobacter_baumannii	4biw	model_0030	atp	3	-7	3.2
Acinetobacter_baumannii	4biw	model_0030	atp	4	-6.8	4.1
Acinetobacter_baumannii	4biw	model_0030	atp	5	-6.7	2.3
Acinetobacter_baumannii	4biw	model_0030	atp	6	-6.2	4.8
Acinetobacter_baumannii	4biw	model_0030	atp	7	-5.9	2.8
Acinetobacter_baumannii	4biw	model_0030	atp	8	-5.8	2.5
Acinetobacter_baumannii	4biw	model_0030	atp	9	-5.6	5
Acinetobacter_baumannii	4biw	model_0030	atp	10	-5.3	5.7
Acinetobacter_baumannii	4biw	model_0030	atp	11	-5	3.6
Acinetobacter_baumannii	4biw	model_0031	atp	1	-6.7	0
Acinetobacter_baumannii	4biw	model_0031	atp	2	-6.6	5.5
Acinetobacter_baumannii	4biw	model_0031	atp	3	-6.4	4.5
Acinetobacter_baumannii	4biw	model_0031	atp	4	-5.5	5
Acinetobacter_baumannii	4biw	model_0031	atp	5	-5.4	4.1
Acinetobacter_baumannii	4biw	model_0031	atp	6	-5.3	4.4
Acinetobacter_baumannii	4biw	model_0031	atp	7	-4.7	6.9
Acinetobacter_baumannii	4biw	model_0031	atp	8	-4.6	4
Acinetobacter_baumannii	4biw	model_0031	atp	9	-4	4.6
Acinetobacter_baumannii	4biw	model_0031	atp	10	-3.8	3.9
Acinetobacter_baumannii	4biw	model_0031	atp	11	-3.7	6.8
Acinetobacter_baumannii	4biw	model_0031	atp	12	-3.1	4.4
Acinetobacter_baumannii	4biw	model_0032	atp	1	-7.7	0
Acinetobacter_baumannii	4biw	model_0032	atp	2	-7.3	2.7
Acinetobacter_baumannii	4biw	model_0032	atp	3	-6.8	2.7
Acinetobacter_baumannii	4biw	model_0032	atp	4	-6.7	2.6
Acinetobacter_baumannii	4biw	model_0032	atp	5	-6.6	2.3
Acinetobacter_baumannii	4biw	model_0032	atp	6	-6.5	6
Acinetobacter_baumannii	4biw	model_0032	atp	7	-6.4	3.2
Acinetobacter_baumannii	4biw	model_0032	atp	8	-5.7	8.3
Acinetobacter_baumannii	4biw	model_0032	atp	9	-5.4	4.2
Acinetobacter_baumannii	4biw	model_0032	atp	10	-4.8	7.9
Acinetobacter_baumannii	4biw	model_0032	atp	11	-3.6	7.2
Acinetobacter_baumannii	4biw	model_0032	atp	12	-3.6	4.9
Acinetobacter_baumannii	4biw	model_0032	atp	13	-3.4	6.4
Acinetobacter_baumannii	4biw	model_0033	atp	1	-8.3	0
Acinetobacter_baumannii	4biw	model_0033	atp	2	-8	4.2
Acinetobacter_baumannii	4biw	model_0033	atp	3	-7.6	2.3
Acinetobacter_baumannii	4biw	model_0033	atp	4	-6.4	3.3
Acinetobacter_baumannii	4biw	model_0033	atp	5	-5.8	2.1
Acinetobacter_baumannii	4biw	model_0033	atp	6	-5.5	3.4
Acinetobacter_baumannii	4biw	model_0033	atp	7	-5.3	2.5
Acinetobacter_baumannii	4biw	model_0033	atp	8	-5.1	3.2
Acinetobacter_baumannii	4biw	model_0033	atp	9	-4.8	7.6
Acinetobacter_baumannii	4biw	model_0033	atp	10	-4.3	7.5
Acinetobacter_baumannii	4biw	model_0033	atp	11	-4.3	3.3
Acinetobacter_baumannii	4biw	model_0034	atp	1	-7.7	0
Acinetobacter_baumannii	4biw	model_0034	atp	2	-7.6	2.1
Acinetobacter_baumannii	4biw	model_0034	atp	3	-6.2	2
Acinetobacter_baumannii	4biw	model_0034	atp	4	-6.2	2.4
Acinetobacter_baumannii	4biw	model_0034	atp	5	-5.7	3.3
Acinetobacter_baumannii	4biw	model_0035	atp	1	-7.4	0
Acinetobacter_baumannii	4biw	model_0035	atp	2	-6.8	2.1
Acinetobacter_baumannii	4biw	model_0035	atp	3	-6.7	3.7
Acinetobacter_baumannii	4biw	model_0035	atp	4	-6.2	2.3
Acinetobacter_baumannii	4biw	model_0035	atp	5	-6	2.1
Acinetobacter_baumannii	4biw	model_0035	atp	6	-4.7	4.2
Acinetobacter_baumannii	4biw	model_0035	atp	7	-4.5	7
Acinetobacter_baumannii	4biw	model_0035	atp	8	-4.3	5.5
Acinetobacter_baumannii	4biw	model_0035	atp	9	-4.3	4.5
Acinetobacter_baumannii	4biw	model_0035	atp	10	-4	6.1
Acinetobacter_baumannii	4biw	model_0036	atp	1	-7.9	0
Acinetobacter_baumannii	4biw	model_0036	atp	2	-7.6	2
Acinetobacter_baumannii	4biw	model_0036	atp	3	-7.1	2.4
Acinetobacter_baumannii	4biw	model_0036	atp	4	-6.6	3.2
Acinetobacter_baumannii	4biw	model_0036	atp	5	-5.9	4.2
Acinetobacter_baumannii	4biw	model_0036	atp	6	-5.7	3.5
Acinetobacter_baumannii	4biw	model_0036	atp	7	-3.9	6.8
Acinetobacter_baumannii	4biw	model_0036	atp	8	-3.9	8.2
Acinetobacter_baumannii	4biw	model_0037	atp	1	-7.6	0
Acinetobacter_baumannii	4biw	model_0037	atp	2	-7.4	2.8
Acinetobacter_baumannii	4biw	model_0037	atp	3	-7.2	7.9
Acinetobacter_baumannii	4biw	model_0037	atp	4	-6.8	2.7
Acinetobacter_baumannii	4biw	model_0037	atp	5	-6.7	4.4
Acinetobacter_baumannii	4biw	model_0037	atp	6	-6.6	3.7
Acinetobacter_baumannii	4biw	model_0037	atp	7	-6.4	2.1
Acinetobacter_baumannii	4biw	model_0037	atp	8	-6.3	2.9
Acinetobacter_baumannii	4biw	model_0037	atp	9	-5.6	8.1
Acinetobacter_baumannii	4biw	model_0037	atp	10	-5.3	2.8
Acinetobacter_baumannii	4biw	model_0037	atp	11	-4.4	4.4
Acinetobacter_baumannii	4biw	model_0037	atp	12	-4.1	6.2
Acinetobacter_baumannii	4biw	model_0038	atp	1	-8	0
Acinetobacter_baumannii	4biw	model_0038	atp	2	-7.9	3.1
Acinetobacter_baumannii	4biw	model_0038	atp	3	-7.9	2.5
Acinetobacter_baumannii	4biw	model_0038	atp	4	-7.9	2.9
Acinetobacter_baumannii	4biw	model_0038	atp	5	-7.8	3.8
Acinetobacter_baumannii	4biw	model_0038	atp	6	-7.7	2.9
Acinetobacter_baumannii	4biw	model_0038	atp	7	-7.3	2.2
Acinetobacter_baumannii	4biw	model_0039	atp	1	-7.2	0
Acinetobacter_baumannii	4biw	model_0039	atp	2	-7.1	2.4
Acinetobacter_baumannii	4biw	model_0039	atp	3	-6.9	2.9
Acinetobacter_baumannii	4biw	model_0039	atp	4	-6.8	3.6
Acinetobacter_baumannii	4biw	model_0039	atp	5	-6.2	4.6
Acinetobacter_baumannii	4biw	model_0039	atp	6	-6	4.1
Acinetobacter_baumannii	4biw	model_0039	atp	7	-5.4	4.6
Acinetobacter_baumannii	4biw	model_0039	atp	8	-5.3	3.6
Acinetobacter_baumannii	4biw	model_0039	atp	9	-5.1	2.3
Acinetobacter_baumannii	4biw	model_0039	atp	10	-4.9	2.9
Acinetobacter_baumannii	4biw	model_0039	atp	11	-4.2	7.1
Acinetobacter_baumannii	4biw	model_0039	atp	12	-3.9	6
Acinetobacter_baumannii	4biw	model_0040	atp	1	-7.9	0
Acinetobacter_baumannii	4biw	model_0040	atp	2	-7.3	2.3
Acinetobacter_baumannii	4biw	model_0040	atp	3	-6.6	2.5
Acinetobacter_baumannii	4biw	model_0040	atp	4	-6.3	3
Acinetobacter_baumannii	4biw	model_0040	atp	5	-6.1	7.4
Acinetobacter_baumannii	4biw	model_0040	atp	6	-5.9	8.4
Acinetobacter_baumannii	4biw	model_0040	atp	7	-5.8	7.3
Acinetobacter_baumannii	4biw	model_0040	atp	8	-5	7.1
Acinetobacter_baumannii	4biw	model_0040	atp	9	-5	3.5
Acinetobacter_baumannii	4biw	model_0040	atp	10	-4.7	6.3
Acinetobacter_baumannii	4biw	model_0040	atp	11	-3.8	7.7
Acinetobacter_baumannii	4biw	model_0040	atp	12	-3.4	5.4
Acinetobacter_baumannii	4biw	model_0041	atp	1	-7.9	0
Acinetobacter_baumannii	4biw	model_0041	atp	2	-7.3	2.5
Acinetobacter_baumannii	4biw	model_0041	atp	3	-6.9	3.7
Acinetobacter_baumannii	4biw	model_0041	atp	4	-6.8	2
Acinetobacter_baumannii	4biw	model_0041	atp	5	-6.4	4.4
Acinetobacter_baumannii	4biw	model_0041	atp	6	-6	2.3
Acinetobacter_baumannii	4biw	model_0041	atp	7	-5.8	2.6
Acinetobacter_baumannii	4biw	model_0041	atp	8	-5.8	3.2
Acinetobacter_baumannii	4biw	model_0041	atp	9	-4.2	6.8
Acinetobacter_baumannii	4biw	model_0041	atp	10	-3	5.2
Acinetobacter_baumannii	4biw	model_0041	atp	11	-2.6	7.1
Acinetobacter_baumannii	4biw	model_0042	atp	1	-6.6	0
Acinetobacter_baumannii	4biw	model_0042	atp	2	-5.9	2.3
Acinetobacter_baumannii	4biw	model_0042	atp	3	-5.6	4.1
Acinetobacter_baumannii	4biw	model_0042	atp	4	-5.6	2.9
Acinetobacter_baumannii	4biw	model_0042	atp	5	-5.3	7.9
Acinetobacter_baumannii	4biw	model_0042	atp	6	-5.2	8.3
Acinetobacter_baumannii	4biw	model_0042	atp	7	-5.1	5.5
Acinetobacter_baumannii	4biw	model_0042	atp	8	-5	5.2
Acinetobacter_baumannii	4biw	model_0042	atp	9	-4.9	2.1
Acinetobacter_baumannii	4biw	model_0042	atp	10	-4.9	4
Acinetobacter_baumannii	4biw	model_0042	atp	11	-4.8	7
Acinetobacter_baumannii	4biw	model_0042	atp	12	-4.8	7.4
Acinetobacter_baumannii	4biw	model_0042	atp	13	-4.6	8.1
Acinetobacter_baumannii	4biw	model_0042	atp	14	-4.4	7.7
Acinetobacter_baumannii	4biw	model_0042	atp	15	-3.9	8.2
Acinetobacter_baumannii	4biw	model_0042	atp	16	-3.1	4.2
Acinetobacter_baumannii	4biw	model_0043	atp	1	-7.8	0
Acinetobacter_baumannii	4biw	model_0043	atp	2	-7.7	2.1
Acinetobacter_baumannii	4biw	model_0043	atp	3	-7.3	2.2
Acinetobacter_baumannii	4biw	model_0043	atp	4	-7	3
Acinetobacter_baumannii	4biw	model_0043	atp	5	-6.7	2.1
Acinetobacter_baumannii	4biw	model_0043	atp	6	-6.3	2.2
Acinetobacter_baumannii	4biw	model_0043	atp	7	-6.2	3.5
Acinetobacter_baumannii	4biw	model_0043	atp	8	-5.9	3.6
Acinetobacter_baumannii	4biw	model_0043	atp	9	-4.7	7.7
Acinetobacter_baumannii	4biw	model_0043	atp	10	-4.4	7.2
Acinetobacter_baumannii	4biw	model_0044	atp	1	-7.1	0
Acinetobacter_baumannii	4biw	model_0044	atp	2	-7.1	2.1
Acinetobacter_baumannii	4biw	model_0044	atp	3	-6.9	4.1
Acinetobacter_baumannii	4biw	model_0044	atp	4	-6.8	2.8
Acinetobacter_baumannii	4biw	model_0044	atp	5	-6.8	3.1
Acinetobacter_baumannii	4biw	model_0044	atp	6	-6.1	2.2
Acinetobacter_baumannii	4biw	model_0044	atp	7	-5.8	6.8
Acinetobacter_baumannii	4biw	model_0044	atp	8	-5.7	7.1
Acinetobacter_baumannii	4biw	model_0044	atp	9	-4.1	7.1
Acinetobacter_baumannii	4biw	model_0045	atp	1	-7.6	0
Acinetobacter_baumannii	4biw	model_0045	atp	2	-7.4	2.2
Acinetobacter_baumannii	4biw	model_0045	atp	3	-6.7	4.3
Acinetobacter_baumannii	4biw	model_0045	atp	4	-6.6	2.3
Acinetobacter_baumannii	4biw	model_0045	atp	5	-6.2	4
Acinetobacter_baumannii	4biw	model_0045	atp	6	-5.9	2.2
Acinetobacter_baumannii	4biw	model_0045	atp	7	-4.1	5.8
Acinetobacter_baumannii	4biw	model_0045	atp	8	-3.9	7.8
Acinetobacter_baumannii	4biw	model_0045	atp	9	-3.3	7.5
Acinetobacter_baumannii	4biw	model_0046	atp	1	-6.8	0
Acinetobacter_baumannii	4biw	model_0046	atp	2	-5.9	2.7
Acinetobacter_baumannii	4biw	model_0046	atp	3	-5.8	2.6
Acinetobacter_baumannii	4biw	model_0046	atp	4	-5.8	4.2
Acinetobacter_baumannii	4biw	model_0046	atp	5	-5.6	4.1
Acinetobacter_baumannii	4biw	model_0046	atp	6	-5.4	5.4
Acinetobacter_baumannii	4biw	model_0046	atp	7	-5.4	3.2
Acinetobacter_baumannii	4biw	model_0046	atp	8	-5.3	2.4
Acinetobacter_baumannii	4biw	model_0046	atp	9	-5.2	6.8
Acinetobacter_baumannii	4biw	model_0046	atp	10	-5	2.3
Acinetobacter_baumannii	4biw	model_0046	atp	11	-4.8	6.5
Acinetobacter_baumannii	4biw	model_0046	atp	12	-4.6	2.9
Acinetobacter_baumannii	4biw	model_0046	atp	13	-4.5	4.4
Acinetobacter_baumannii	4biw	model_0046	atp	14	-4.5	7.7
Acinetobacter_baumannii	4biw	model_0046	atp	15	-4.3	3.4
Acinetobacter_baumannii	4biw	model_0046	atp	16	-3.8	3.6
Acinetobacter_baumannii	4biw	model_0046	atp	17	-3.5	7.2
Acinetobacter_baumannii	4biw	model_0047	atp	1	-7.6	0
Acinetobacter_baumannii	4biw	model_0047	atp	2	-7.6	2.3
Acinetobacter_baumannii	4biw	model_0047	atp	3	-7.1	3.6
Acinetobacter_baumannii	4biw	model_0047	atp	4	-6.7	2.7
Acinetobacter_baumannii	4biw	model_0047	atp	5	-6.6	2.4
Acinetobacter_baumannii	4biw	model_0047	atp	6	-6.5	3
Acinetobacter_baumannii	4biw	model_0047	atp	7	-6.4	2
Acinetobacter_baumannii	4biw	model_0047	atp	8	-6.3	4.3
Acinetobacter_baumannii	4biw	model_0047	atp	9	-5.7	3.9
Acinetobacter_baumannii	4biw	model_0047	atp	10	-5.7	2.9
Acinetobacter_baumannii	4biw	model_0047	atp	11	-5.6	4.3
Acinetobacter_baumannii	4biw	model_0047	atp	12	-5.2	6.4
Acinetobacter_baumannii	4biw	model_0048	atp	1	-8.5	0
Acinetobacter_baumannii	4biw	model_0048	atp	2	-7.9	2.8
Acinetobacter_baumannii	4biw	model_0048	atp	3	-7.3	2.4
Acinetobacter_baumannii	4biw	model_0048	atp	4	-7.3	4
Acinetobacter_baumannii	4biw	model_0048	atp	5	-7.2	2.1
Acinetobacter_baumannii	4biw	model_0048	atp	6	-7.1	4.1
Acinetobacter_baumannii	4biw	model_0048	atp	7	-6.8	3.5
Acinetobacter_baumannii	4biw	model_0048	atp	8	-6.3	9.1
Acinetobacter_baumannii	4biw	model_0048	atp	9	-5.4	8.8
Acinetobacter_baumannii	4biw	model_0048	atp	10	-4.6	8.3
Acinetobacter_baumannii	4biw	model_0048	atp	11	-2.9	8.8
Acinetobacter_baumannii	4biw	model_0049	atp	1	-8.4	0
Acinetobacter_baumannii	4biw	model_0049	atp	2	-8	3.3
Acinetobacter_baumannii	4biw	model_0049	atp	3	-7.3	2.2
Acinetobacter_baumannii	4biw	model_0049	atp	4	-6.7	3.6
Acinetobacter_baumannii	4biw	model_0049	atp	5	-6.5	7
Acinetobacter_baumannii	4biw	model_0049	atp	6	-5.9	4.8
Acinetobacter_baumannii	4biw	model_0049	atp	7	-5.8	2.6
Acinetobacter_baumannii	4biw	model_0050	atp	1	-8	0
Acinetobacter_baumannii	4biw	model_0050	atp	2	-6	2.2
Acinetobacter_baumannii	4biw	model_0050	atp	3	-5.7	3.5
Acinetobacter_baumannii	4biw	model_0050	atp	4	-5.4	3.3
Acinetobacter_baumannii	4biw	model_0050	atp	5	-5.2	3.1
Acinetobacter_baumannii	4biw	model_0050	atp	6	-4.9	7.8
Acinetobacter_baumannii	4biw	model_0050	atp	7	-4.8	7.2
Acinetobacter_baumannii	4biw	model_0050	atp	8	-4.6	5.3
Acinetobacter_baumannii	4biw	model_0050	atp	9	-4.3	3.4
Acinetobacter_baumannii	4biw	model_0050	atp	10	-4.1	4.2
Acinetobacter_baumannii	4biw	model_0050	atp	11	-4	5.4
Acinetobacter_baumannii	4biw	model_0050	atp	12	-3.6	4.7
Acinetobacter_baumannii	4biw	model_0050	atp	13	-3.6	7.2
Acinetobacter_baumannii	4biw	model_0051	atp	1	-7.7	0
Acinetobacter_baumannii	4biw	model_0051	atp	2	-6.5	6.3
Acinetobacter_baumannii	4biw	model_0051	atp	3	-5.6	4.3
Acinetobacter_baumannii	4biw	model_0051	atp	4	-5.5	6.5
Acinetobacter_baumannii	4biw	model_0051	atp	5	-5.2	5.8
Acinetobacter_baumannii	4biw	model_0051	atp	6	-5.1	3.8
Acinetobacter_baumannii	4biw	model_0051	atp	7	-5	7.1
Acinetobacter_baumannii	4biw	model_0051	atp	8	-4.9	6.3
Acinetobacter_baumannii	4biw	model_0051	atp	9	-4.3	3.4
Acinetobacter_baumannii	4biw	model_0051	atp	10	-4.3	3.3
Acinetobacter_baumannii	4biw	model_0051	atp	11	-4.1	6.7
Acinetobacter_baumannii	4biw	model_0051	atp	12	-3.9	3.7
Acinetobacter_baumannii	4biw	model_0051	atp	13	-3.9	5.7
Acinetobacter_baumannii	4biw	model_0052	atp	1	-7.7	0
Acinetobacter_baumannii	4biw	model_0052	atp	2	-7.6	4.1
Acinetobacter_baumannii	4biw	model_0052	atp	3	-7.5	2.3
Acinetobacter_baumannii	4biw	model_0052	atp	4	-7.4	3.5
Acinetobacter_baumannii	4biw	model_0052	atp	5	-7.2	3.1
Acinetobacter_baumannii	4biw	model_0052	atp	6	-6.5	2.1
Acinetobacter_baumannii	4biw	model_0052	atp	7	-6.2	3.2
Acinetobacter_baumannii	4biw	model_0052	atp	8	-6	2.9
Acinetobacter_baumannii	4biw	model_0052	atp	9	-5.8	2
Acinetobacter_baumannii	4biw	model_0052	atp	10	-5.1	7.2
Acinetobacter_baumannii	4biw	model_0053	atp	1	-7.4	0
Acinetobacter_baumannii	4biw	model_0053	atp	2	-7.3	2.8
Acinetobacter_baumannii	4biw	model_0053	atp	3	-7.2	3.8
Acinetobacter_baumannii	4biw	model_0053	atp	4	-7.1	3.9
Acinetobacter_baumannii	4biw	model_0053	atp	5	-6.8	2
Acinetobacter_baumannii	4biw	model_0053	atp	6	-6.7	3.1
Acinetobacter_baumannii	4biw	model_0053	atp	7	-6.5	2.3
Acinetobacter_baumannii	4biw	model_0053	atp	8	-5.9	2.5
Acinetobacter_baumannii	4biw	model_0053	atp	9	-5.5	2.7
Acinetobacter_baumannii	4biw	model_0053	atp	10	-5	5
Acinetobacter_baumannii	4biw	model_0053	atp	11	-4.7	8
Acinetobacter_baumannii	4biw	model_0053	atp	12	-4.2	6.8
Acinetobacter_baumannii	4biw	model_0054	atp	1	-7	0
Acinetobacter_baumannii	4biw	model_0054	atp	2	-6.8	2.5
Acinetobacter_baumannii	4biw	model_0054	atp	3	-6.6	3
Acinetobacter_baumannii	4biw	model_0054	atp	4	-6.6	4.1
Acinetobacter_baumannii	4biw	model_0054	atp	5	-6.4	2.9
Acinetobacter_baumannii	4biw	model_0054	atp	6	-6.1	3.9
Acinetobacter_baumannii	4biw	model_0054	atp	7	-5.9	6.3
Acinetobacter_baumannii	4biw	model_0054	atp	8	-5.6	5.6
Acinetobacter_baumannii	4biw	model_0054	atp	9	-5.6	3.8
Acinetobacter_baumannii	4biw	model_0054	atp	10	-5.4	4
Acinetobacter_baumannii	4biw	model_0054	atp	11	-5.2	5.9
Acinetobacter_baumannii	4biw	model_0054	atp	12	-4.5	4.3
Acinetobacter_baumannii	4biw	model_0054	atp	13	-4.2	6.7
Acinetobacter_baumannii	4biw	model_0054	atp	14	-2.7	5.8
Acinetobacter_baumannii	4biw	model_0055	atp	1	-7.7	0
Acinetobacter_baumannii	4biw	model_0055	atp	2	-7.3	2.2
Acinetobacter_baumannii	4biw	model_0055	atp	3	-7.2	2
Acinetobacter_baumannii	4biw	model_0055	atp	4	-6.6	3
Acinetobacter_baumannii	4biw	model_0055	atp	5	-6.3	4.4
Acinetobacter_baumannii	4biw	model_0055	atp	6	-5.7	2.6
Acinetobacter_baumannii	4biw	model_0055	atp	7	-4.9	3.3
Acinetobacter_baumannii	4biw	model_0055	atp	8	-4.6	4.2
Acinetobacter_baumannii	4biw	model_0055	atp	9	-4.4	6.6
Acinetobacter_baumannii	4biw	model_0055	atp	10	-4.4	4.9
Acinetobacter_baumannii	4biw	model_0055	atp	11	-3.3	6.5
Acinetobacter_baumannii	4biw	model_0056	atp	1	-7.6	0
Acinetobacter_baumannii	4biw	model_0056	atp	2	-7.5	3.5
Acinetobacter_baumannii	4biw	model_0056	atp	3	-7.3	2.8
Acinetobacter_baumannii	4biw	model_0056	atp	4	-7.2	2.6
Acinetobacter_baumannii	4biw	model_0056	atp	5	-7.1	2.8
Acinetobacter_baumannii	4biw	model_0056	atp	6	-6.9	2.9
Acinetobacter_baumannii	4biw	model_0056	atp	7	-6.6	4.3
Acinetobacter_baumannii	4biw	model_0056	atp	8	-6.3	3.8
Acinetobacter_baumannii	4biw	model_0056	atp	9	-6.3	2.8
Acinetobacter_baumannii	4biw	model_0056	atp	10	-6	3.4
Acinetobacter_baumannii	4biw	model_0056	atp	11	-4	4.4
Acinetobacter_baumannii	4biw	model_0056	atp	12	-2.4	5.2
Acinetobacter_baumannii	4biw	model_0057	atp	1	-7.6	0
Acinetobacter_baumannii	4biw	model_0057	atp	2	-6.9	4.1
Acinetobacter_baumannii	4biw	model_0057	atp	3	-6.8	2.9
Acinetobacter_baumannii	4biw	model_0057	atp	4	-6.7	3.6
Acinetobacter_baumannii	4biw	model_0057	atp	5	-6.4	2.3
Acinetobacter_baumannii	4biw	model_0057	atp	6	-6.2	2.4
Acinetobacter_baumannii	4biw	model_0057	atp	7	-6	3.2
Acinetobacter_baumannii	4biw	model_0057	atp	8	-6	5.9
Acinetobacter_baumannii	4biw	model_0057	atp	9	-5.9	2.9
Acinetobacter_baumannii	4biw	model_0057	atp	10	-5.9	2.4
Acinetobacter_baumannii	4biw	model_0057	atp	11	-5.5	3.3
Acinetobacter_baumannii	4biw	model_0057	atp	12	-5.2	5.2
Acinetobacter_baumannii	4biw	model_0057	atp	13	-5.2	5.5
Acinetobacter_baumannii	4biw	model_0057	atp	14	-4.5	3.8
Acinetobacter_baumannii	4biw	model_0058	atp	1	-5.6	0
Acinetobacter_baumannii	4biw	model_0058	atp	2	-5.3	7.5
Acinetobacter_baumannii	4biw	model_0058	atp	3	-5.3	2.1
Acinetobacter_baumannii	4biw	model_0058	atp	4	-5	5
Acinetobacter_baumannii	4biw	model_0058	atp	5	-5	4
Acinetobacter_baumannii	4biw	model_0058	atp	6	-4.9	5.7
Acinetobacter_baumannii	4biw	model_0058	atp	7	-4.7	5.2
Acinetobacter_baumannii	4biw	model_0058	atp	8	-4.6	4.1
Acinetobacter_baumannii	4biw	model_0058	atp	9	-4.2	2.9
Acinetobacter_baumannii	4biw	model_0058	atp	10	-4.1	3.8
Acinetobacter_baumannii	4biw	model_0058	atp	11	-3.9	2.1
Acinetobacter_baumannii	4biw	model_0058	atp	12	-3.8	2.7
Acinetobacter_baumannii	4biw	model_0058	atp	13	-3.8	2.8
Acinetobacter_baumannii	4biw	model_0058	atp	14	-3.7	2.6
Acinetobacter_baumannii	4biw	model_0058	atp	15	-3.4	8.4
Acinetobacter_baumannii	4biw	model_0058	atp	16	-3.3	2.8
Acinetobacter_baumannii	4biw	model_0058	atp	17	-3.1	7.1
Acinetobacter_baumannii	4biw	model_0058	atp	18	-3.1	4.4
Acinetobacter_baumannii	4biw	model_0058	atp	19	-3.1	4.5
Acinetobacter_baumannii	4biw	model_0058	atp	20	-3.1	7.4
Acinetobacter_baumannii	4biw	model_0058	atp	21	-2.8	5.4
Acinetobacter_baumannii	4biw	model_0058	atp	22	-2.7	8
Acinetobacter_baumannii	4biw	model_0058	atp	23	-2.7	7.3
Acinetobacter_baumannii	4biw	model_0058	atp	24	-2.6	4.7
Acinetobacter_baumannii	4biw	model_0058	atp	25	-2.5	7.6
Acinetobacter_baumannii	4biw	model_0058	atp	26	-1.7	7.6
Acinetobacter_baumannii	4biw	model_0059	atp	1	-8.1	0
Acinetobacter_baumannii	4biw	model_0059	atp	2	-8	2.8
Acinetobacter_baumannii	4biw	model_0059	atp	3	-7.7	4.6
Acinetobacter_baumannii	4biw	model_0059	atp	4	-7.6	2.9
Acinetobacter_baumannii	4biw	model_0059	atp	5	-7.1	2.8
Acinetobacter_baumannii	4biw	model_0059	atp	6	-6.4	4
Acinetobacter_baumannii	4biw	model_0059	atp	7	-4.2	6.5
Acinetobacter_baumannii	4biw	model_0059	atp	8	-4.1	3.3
Acinetobacter_baumannii	4biw	model_0060	atp	1	-8.4	0
Acinetobacter_baumannii	4biw	model_0060	atp	2	-8.2	2.5
Acinetobacter_baumannii	4biw	model_0060	atp	3	-8.1	2.3
Acinetobacter_baumannii	4biw	model_0060	atp	4	-7.7	3.5
Acinetobacter_baumannii	4biw	model_0060	atp	5	-7.5	3
Acinetobacter_baumannii	4biw	model_0060	atp	6	-7.4	2.6
Acinetobacter_baumannii	4biw	model_0060	atp	7	-7.4	2.3
Acinetobacter_baumannii	4biw	model_0060	atp	8	-6.9	2.8
Acinetobacter_baumannii	4biw	model_0060	atp	9	-6.8	2.2
Acinetobacter_baumannii	4biw	model_0060	atp	10	-6.5	3.6
Acinetobacter_baumannii	4biw	model_0060	atp	11	-6.2	2.8
Acinetobacter_baumannii	4biw	model_0060	atp	12	-5.8	2.7
Acinetobacter_baumannii	4biw	model_0061	atp	1	-7.5	0
Acinetobacter_baumannii	4biw	model_0061	atp	2	-6.4	2.2
Acinetobacter_baumannii	4biw	model_0061	atp	3	-5.7	3
Acinetobacter_baumannii	4biw	model_0061	atp	4	-5.5	2.5
Acinetobacter_baumannii	4biw	model_0061	atp	5	-4.6	2.3
Acinetobacter_baumannii	4biw	model_0061	atp	6	-4.4	7.8
Acinetobacter_baumannii	4biw	model_0061	atp	7	-4.3	6.1
Acinetobacter_baumannii	4biw	model_0061	atp	8	-3.5	4
Acinetobacter_baumannii	4biw	model_0062	atp	1	-8	0
Acinetobacter_baumannii	4biw	model_0062	atp	2	-7.1	2.2
Acinetobacter_baumannii	4biw	model_0062	atp	3	-6.7	2.1
Acinetobacter_baumannii	4biw	model_0062	atp	4	-6.5	2.5
Acinetobacter_baumannii	4biw	model_0062	atp	5	-6.2	3.7
Acinetobacter_baumannii	4biw	model_0062	atp	6	-6.2	2.5
Acinetobacter_baumannii	4biw	model_0062	atp	7	-5.7	4
Acinetobacter_baumannii	4biw	model_0062	atp	8	-3.6	3.9
Acinetobacter_baumannii	4biw	model_0063	atp	1	-8	0
Acinetobacter_baumannii	4biw	model_0063	atp	2	-7.6	2.6
Acinetobacter_baumannii	4biw	model_0063	atp	3	-6.9	2.9
Acinetobacter_baumannii	4biw	model_0063	atp	4	-6.6	3.4
Acinetobacter_baumannii	4biw	model_0063	atp	5	-6.5	2.1
Acinetobacter_baumannii	4biw	model_0063	atp	6	-6.1	2.2
Acinetobacter_baumannii	4biw	model_0063	atp	7	-6.1	7.3
Acinetobacter_baumannii	4biw	model_0063	atp	8	-5.7	2.3
Acinetobacter_baumannii	4biw	model_0063	atp	9	-5.7	6.5
Acinetobacter_baumannii	4biw	model_0063	atp	10	-3.5	7.6
Acinetobacter_baumannii	4biw	model_0064	atp	1	-7.4	0
Acinetobacter_baumannii	4biw	model_0064	atp	2	-6.5	2.9
Acinetobacter_baumannii	4biw	model_0064	atp	3	-6.3	2
Acinetobacter_baumannii	4biw	model_0064	atp	4	-6.3	3.7
Acinetobacter_baumannii	4biw	model_0064	atp	5	-6.2	3.4
Acinetobacter_baumannii	4biw	model_0064	atp	6	-6.2	3.3
Acinetobacter_baumannii	4biw	model_0064	atp	7	-6.1	2
Acinetobacter_baumannii	4biw	model_0064	atp	8	-6	7.8
Acinetobacter_baumannii	4biw	model_0064	atp	9	-5.5	7.4
Acinetobacter_baumannii	4biw	model_0064	atp	10	-5.5	3.5
Acinetobacter_baumannii	4biw	model_0064	atp	11	-5.3	7.1
Acinetobacter_baumannii	4biw	model_0064	atp	12	-5.3	3.6
Acinetobacter_baumannii	4biw	model_0064	atp	13	-5	5.3
Acinetobacter_baumannii	4biw	model_0064	atp	14	-4.4	7.7
Acinetobacter_baumannii	4biw	model_0064	atp	15	-4.2	4.3
Acinetobacter_baumannii	4biw	model_0065	atp	1	-7.5	0
Acinetobacter_baumannii	4biw	model_0065	atp	2	-7.1	2.3
Acinetobacter_baumannii	4biw	model_0065	atp	3	-7.1	2.7
Acinetobacter_baumannii	4biw	model_0065	atp	4	-6.6	4.2
Acinetobacter_baumannii	4biw	model_0065	atp	5	-6.2	4
Acinetobacter_baumannii	4biw	model_0065	atp	6	-5.7	2.6
Acinetobacter_baumannii	4biw	model_0065	atp	7	-5.5	2.7
Acinetobacter_baumannii	4biw	model_0065	atp	8	-5.4	7.4
Acinetobacter_baumannii	4biw	model_0065	atp	9	-4.5	7.5
Acinetobacter_baumannii	4biw	model_0066	atp	1	-7.4	0
Acinetobacter_baumannii	4biw	model_0066	atp	2	-7.3	3.8
Acinetobacter_baumannii	4biw	model_0066	atp	3	-7.3	2.7
Acinetobacter_baumannii	4biw	model_0066	atp	4	-6.7	2.2
Acinetobacter_baumannii	4biw	model_0066	atp	5	-5.6	2.6
Acinetobacter_baumannii	4biw	model_0066	atp	6	-5.3	4.1
Acinetobacter_baumannii	4biw	model_0066	atp	7	-4.9	3.6
Acinetobacter_baumannii	4biw	model_0067	atp	1	-7.5	0
Acinetobacter_baumannii	4biw	model_0067	atp	2	-7.3	3.6
Acinetobacter_baumannii	4biw	model_0067	atp	3	-7.2	3.7
Acinetobacter_baumannii	4biw	model_0067	atp	4	-6.9	2.1
Acinetobacter_baumannii	4biw	model_0067	atp	5	-6.8	2
Acinetobacter_baumannii	4biw	model_0067	atp	6	-6.5	2.7
Acinetobacter_baumannii	4biw	model_0067	atp	7	-6.4	3.9
Acinetobacter_baumannii	4biw	model_0067	atp	8	-6.4	2.2
Acinetobacter_baumannii	4biw	model_0067	atp	9	-6.3	2.6
Acinetobacter_baumannii	4biw	model_0067	atp	10	-6.2	4.4
Acinetobacter_baumannii	4biw	model_0067	atp	11	-5.9	2.4
Acinetobacter_baumannii	4biw	model_0067	atp	12	-5.9	3.1
Acinetobacter_baumannii	4biw	model_0067	atp	13	-5.8	3.2
Acinetobacter_baumannii	4biw	model_0068	atp	1	-8.7	0
Acinetobacter_baumannii	4biw	model_0068	atp	2	-8.4	2.6
Acinetobacter_baumannii	4biw	model_0068	atp	3	-7.8	3.7
Acinetobacter_baumannii	4biw	model_0068	atp	4	-7.7	2.1
Acinetobacter_baumannii	4biw	model_0068	atp	5	-7.6	4.3
Acinetobacter_baumannii	4biw	model_0068	atp	6	-7.6	4.2
Acinetobacter_baumannii	4biw	model_0068	atp	7	-7.1	4.2
Acinetobacter_baumannii	4biw	model_0068	atp	8	-7	2.7
Acinetobacter_baumannii	4biw	model_0068	atp	9	-6.8	4.1
Acinetobacter_baumannii	4biw	model_0068	atp	10	-6.6	2.9
Acinetobacter_baumannii	4biw	model_0068	atp	11	-2.2	7.8
Acinetobacter_baumannii	4biw	model_0069	atp	1	-9.4	0
Acinetobacter_baumannii	4biw	model_0069	atp	2	-8.3	2
Acinetobacter_baumannii	4biw	model_0069	atp	3	-8.1	3.2
Acinetobacter_baumannii	4biw	model_0069	atp	4	-8	2.2
Acinetobacter_baumannii	4biw	model_0069	atp	5	-7.7	7.3
Acinetobacter_baumannii	4biw	model_0069	atp	6	-7.6	5.6
Acinetobacter_baumannii	4biw	model_0069	atp	7	-7.4	2.3
Acinetobacter_baumannii	4biw	model_0069	atp	8	-6.2	2.3
Acinetobacter_baumannii	4biw	model_0069	atp	9	-6.2	5.9
Acinetobacter_baumannii	4biw	model_0069	atp	10	-6.1	3.5
Acinetobacter_baumannii	4biw	model_0069	atp	11	-6.1	8.5
Acinetobacter_baumannii	4biw	model_0069	atp	12	-6	7.4
Acinetobacter_baumannii	4biw	model_0069	atp	13	-6	7.9
Acinetobacter_baumannii	4biw	model_0069	atp	14	-5.8	4.7
Acinetobacter_baumannii	4biw	model_0069	atp	15	-5.8	4.3
Acinetobacter_baumannii	4biw	model_0069	atp	16	-5.3	6.5
Acinetobacter_baumannii	4biw	model_0069	atp	17	-5	6.9
Acinetobacter_baumannii	4biw	model_0069	atp	18	-4.9	8.1
Acinetobacter_baumannii	4biw	model_0070	atp	1	-7.5	0
Acinetobacter_baumannii	4biw	model_0070	atp	2	-7.4	2.2
Acinetobacter_baumannii	4biw	model_0070	atp	3	-7.3	2.8
Acinetobacter_baumannii	4biw	model_0070	atp	4	-6.9	2.8
Acinetobacter_baumannii	4biw	model_0070	atp	5	-6.6	2.2
Acinetobacter_baumannii	4biw	model_0070	atp	6	-3.1	5.2
Acinetobacter_baumannii	4biw	model_0071	atp	1	-8.5	0
Acinetobacter_baumannii	4biw	model_0071	atp	2	-8	2.9
Acinetobacter_baumannii	4biw	model_0071	atp	3	-6.9	2.1
Acinetobacter_baumannii	4biw	model_0071	atp	4	-6	4.6
Acinetobacter_baumannii	4biw	model_0071	atp	5	-6	2
Acinetobacter_baumannii	4biw	model_0071	atp	6	-5.7	7.4
Acinetobacter_baumannii	4biw	model_0071	atp	7	-5.5	3.5
Acinetobacter_baumannii	4biw	model_0071	atp	8	-5.5	7.3
Acinetobacter_baumannii	4biw	model_0071	atp	9	-3.1	6.9
Acinetobacter_baumannii	4biw	model_0072	atp	1	-8	0
Acinetobacter_baumannii	4biw	model_0072	atp	2	-7.8	2.5
Acinetobacter_baumannii	4biw	model_0072	atp	3	-7.8	2
Acinetobacter_baumannii	4biw	model_0072	atp	4	-7.7	2.1
Acinetobacter_baumannii	4biw	model_0072	atp	5	-7.5	7.5
Acinetobacter_baumannii	4biw	model_0072	atp	6	-7.4	4
Acinetobacter_baumannii	4biw	model_0072	atp	7	-7.1	3.3
Acinetobacter_baumannii	4biw	model_0072	atp	8	-7.1	4.2
Acinetobacter_baumannii	4biw	model_0072	atp	9	-7	4
Acinetobacter_baumannii	4biw	model_0072	atp	10	-6.8	6.7
Acinetobacter_baumannii	4biw	model_0072	atp	11	-6.7	3
Acinetobacter_baumannii	4biw	model_0072	atp	12	-6.6	2.7
Acinetobacter_baumannii	4biw	model_0072	atp	13	-6.3	4.7
Acinetobacter_baumannii	4biw	model_0072	atp	14	-6.3	5.9
Acinetobacter_baumannii	4biw	model_0072	atp	15	-6.1	6.4
Acinetobacter_baumannii	4biw	model_0072	atp	16	-6.1	4.8
Acinetobacter_baumannii	4biw	model_0072	atp	17	-5.6	5.2
Acinetobacter_baumannii	4biw	model_0072	atp	18	-4.8	6.1
Acinetobacter_baumannii	4biw	model_0073	atp	1	-7.9	0
Acinetobacter_baumannii	4biw	model_0073	atp	2	-7.8	2.3
Acinetobacter_baumannii	4biw	model_0073	atp	3	-7.3	2.2
Acinetobacter_baumannii	4biw	model_0073	atp	4	-6.7	3.6
Acinetobacter_baumannii	4biw	model_0073	atp	5	-6.6	2.9
Acinetobacter_baumannii	4biw	model_0073	atp	6	-6.3	2.8
Acinetobacter_baumannii	4biw	model_0073	atp	7	-6.1	3.6
Acinetobacter_baumannii	4biw	model_0073	atp	8	-6.1	7.7
Acinetobacter_baumannii	4biw	model_0073	atp	9	-6	2.6
Acinetobacter_baumannii	4biw	model_0073	atp	10	-5.2	2.2
Acinetobacter_baumannii	4biw	model_0073	atp	11	-5.1	4.8
Acinetobacter_baumannii	4biw	model_0073	atp	12	-4.9	7.8
Acinetobacter_baumannii	4biw	model_0073	atp	13	-4.7	3.1
Acinetobacter_baumannii	4biw	model_0073	atp	14	-4.5	7.5
Acinetobacter_baumannii	4biw	model_0073	atp	15	-4.2	5.9
Acinetobacter_baumannii	4biw	model_0073	atp	16	-3.7	7.8
Acinetobacter_baumannii	4biw	model_0073	atp	17	-2.8	5.2
Acinetobacter_baumannii	4biw	model_0074	atp	1	-9.9	0
Acinetobacter_baumannii	4biw	model_0074	atp	2	-9.4	2.2
Acinetobacter_baumannii	4biw	model_0074	atp	3	-8.4	2.4
Acinetobacter_baumannii	4biw	model_0074	atp	4	-7.6	9.6
Acinetobacter_baumannii	4biw	model_0074	atp	5	-7.4	3.1
Acinetobacter_baumannii	4biw	model_0074	atp	6	-7	7.9
Acinetobacter_baumannii	4biw	model_0074	atp	7	-7	8
Acinetobacter_baumannii	4biw	model_0074	atp	8	-6.8	3.2
Acinetobacter_baumannii	4biw	model_0074	atp	9	-6.7	9.2
Acinetobacter_baumannii	4biw	model_0074	atp	10	-6.6	8
Acinetobacter_baumannii	4biw	model_0074	atp	11	-6.5	8.7
Acinetobacter_baumannii	4biw	model_0074	atp	12	-6.1	7.9
Acinetobacter_baumannii	4biw	model_0074	atp	13	-5.5	8.7
Acinetobacter_baumannii	4biw	model_0075	atp	1	-8.2	0
Acinetobacter_baumannii	4biw	model_0075	atp	2	-7.5	2.2
Acinetobacter_baumannii	4biw	model_0075	atp	3	-7	2.1
Acinetobacter_baumannii	4biw	model_0075	atp	4	-6.6	2.7
Acinetobacter_baumannii	4biw	model_0075	atp	5	-6.5	2.2
Acinetobacter_baumannii	4biw	model_0075	atp	6	-6.1	5.2
Acinetobacter_baumannii	4biw	model_0075	atp	7	-5.7	3.2
Acinetobacter_baumannii	4biw	model_0075	atp	8	-3.7	8.8
Acinetobacter_baumannii	4biw	model_0076	atp	1	-8.8	0
Acinetobacter_baumannii	4biw	model_0076	atp	2	-7.5	3
Acinetobacter_baumannii	4biw	model_0076	atp	3	-6.9	2.1
Acinetobacter_baumannii	4biw	model_0076	atp	4	-6.7	8.9
Acinetobacter_baumannii	4biw	model_0076	atp	5	-6.4	3.3
Acinetobacter_baumannii	4biw	model_0076	atp	6	-6.3	3
Acinetobacter_baumannii	4biw	model_0076	atp	7	-6.1	7
Acinetobacter_baumannii	4biw	model_0076	atp	8	-6.1	2.1
Acinetobacter_baumannii	4biw	model_0076	atp	9	-5.8	2
Acinetobacter_baumannii	4biw	model_0076	atp	10	-5.5	7.6
Acinetobacter_baumannii	4biw	model_0076	atp	11	-4.9	7.9
Acinetobacter_baumannii	4biw	model_0076	atp	12	-3.8	5.6
Acinetobacter_baumannii	4biw	model_0077	atp	1	-9	0
Acinetobacter_baumannii	4biw	model_0077	atp	2	-8.8	2
Acinetobacter_baumannii	4biw	model_0077	atp	3	-8.1	3.7
Acinetobacter_baumannii	4biw	model_0077	atp	4	-7.3	2.4
Acinetobacter_baumannii	4biw	model_0077	atp	5	-6.7	2.4
Acinetobacter_baumannii	4biw	model_0077	atp	6	-6.2	7.4
Acinetobacter_baumannii	4biw	model_0077	atp	7	-5.7	5.2
Acinetobacter_baumannii	4biw	model_0077	atp	8	-3.2	4.9
Acinetobacter_baumannii	4biw	model_0078	atp	1	-7.6	0
Acinetobacter_baumannii	4biw	model_0078	atp	2	-7.5	2.6
Acinetobacter_baumannii	4biw	model_0078	atp	3	-7.2	2.8
Acinetobacter_baumannii	4biw	model_0078	atp	4	-6.9	2.7
Acinetobacter_baumannii	4biw	model_0078	atp	5	-6.9	2.8
Acinetobacter_baumannii	4biw	model_0078	atp	6	-6.4	3.5
Acinetobacter_baumannii	4biw	model_0078	atp	7	-6.4	3.5
Acinetobacter_baumannii	4biw	model_0078	atp	8	-6	3.6
Acinetobacter_baumannii	4biw	model_0078	atp	9	-5.5	3.3
Acinetobacter_baumannii	4biw	model_0078	atp	10	-5.1	7.7
Acinetobacter_baumannii	4biw	model_0078	atp	11	-4.8	6.8
Acinetobacter_baumannii	4biw	model_0078	atp	12	-4.7	3.4
Acinetobacter_baumannii	4biw	model_0079	atp	1	-7.7	0
Acinetobacter_baumannii	4biw	model_0079	atp	2	-7.7	2.3
Acinetobacter_baumannii	4biw	model_0079	atp	3	-7.1	3.3
Acinetobacter_baumannii	4biw	model_0079	atp	4	-6.9	3.3
Acinetobacter_baumannii	4biw	model_0079	atp	5	-6.7	3.8
Acinetobacter_baumannii	4biw	model_0079	atp	6	-6.6	3.8
Acinetobacter_baumannii	4biw	model_0079	atp	7	-6.5	3.4
Acinetobacter_baumannii	4biw	model_0079	atp	8	-6.2	3.2
Acinetobacter_baumannii	4biw	model_0079	atp	9	-6.2	2.7
Acinetobacter_baumannii	4biw	model_0079	atp	10	-5.7	6
Acinetobacter_baumannii	4biw	model_0079	atp	11	-5.7	3.3
Acinetobacter_baumannii	4biw	model_0079	atp	12	-5.2	4.1
Acinetobacter_baumannii	4biw	model_0079	atp	13	-4.8	4.7
Acinetobacter_baumannii	4biw	model_0079	atp	14	-3.7	4.8
Acinetobacter_baumannii	4biw	model_0080	atp	1	-7.8	0
Acinetobacter_baumannii	4biw	model_0080	atp	2	-7.4	3
Acinetobacter_baumannii	4biw	model_0080	atp	3	-6.7	2.1
Acinetobacter_baumannii	4biw	model_0080	atp	4	-5.9	2
Acinetobacter_baumannii	4biw	model_0080	atp	5	-4.3	5.7
Acinetobacter_baumannii	4biw	model_0080	atp	6	-4.2	2.8
Acinetobacter_baumannii	4biw	model_0080	atp	7	-3.8	4.2
Acinetobacter_baumannii	4biw	model_0080	atp	8	-3.7	7
Acinetobacter_baumannii	4biw	model_0080	atp	9	-3.3	5.4
Acinetobacter_baumannii	4biw	model_0081	atp	1	-9.4	0
Acinetobacter_baumannii	4biw	model_0081	atp	2	-7.9	2.4
Acinetobacter_baumannii	4biw	model_0081	atp	3	-7.5	3.7
Acinetobacter_baumannii	4biw	model_0081	atp	4	-6.9	2.8
Acinetobacter_baumannii	4biw	model_0081	atp	5	-6.9	2.3
Acinetobacter_baumannii	4biw	model_0081	atp	6	-6.1	8
Acinetobacter_baumannii	4biw	model_0081	atp	7	-5.9	2.3
Acinetobacter_baumannii	4biw	model_0081	atp	8	-5.4	6.5
Acinetobacter_baumannii	4biw	model_0081	atp	9	-4.9	8.9
Acinetobacter_baumannii	4biw	model_0082	atp	1	-7.3	0
Acinetobacter_baumannii	4biw	model_0082	atp	2	-6.8	2.2
Acinetobacter_baumannii	4biw	model_0082	atp	3	-5.8	3.3
Acinetobacter_baumannii	4biw	model_0082	atp	4	-5.6	2.9
Acinetobacter_baumannii	4biw	model_0082	atp	5	-5.5	2.5
Acinetobacter_baumannii	4biw	model_0082	atp	6	-5.4	2.5
Acinetobacter_baumannii	4biw	model_0082	atp	7	-4.8	5.6
Acinetobacter_baumannii	4biw	model_0082	atp	8	-4.6	2.7
Acinetobacter_baumannii	4biw	model_0082	atp	9	-4.5	4.6
Acinetobacter_baumannii	4biw	model_0082	atp	10	-3.7	6.9
Acinetobacter_baumannii	4biw	model_0083	atp	1	-6.7	0
Acinetobacter_baumannii	4biw	model_0083	atp	2	-6.6	7.8
Acinetobacter_baumannii	4biw	model_0083	atp	3	-6.4	8.3
Acinetobacter_baumannii	4biw	model_0083	atp	4	-6.2	2.1
Acinetobacter_baumannii	4biw	model_0083	atp	5	-5.9	4.8
Acinetobacter_baumannii	4biw	model_0083	atp	6	-5.6	2.4
Acinetobacter_baumannii	4biw	model_0083	atp	7	-5.5	7.3
Acinetobacter_baumannii	4biw	model_0083	atp	8	-5.3	7.1
Acinetobacter_baumannii	4biw	model_0083	atp	9	-4.9	8.5
Acinetobacter_baumannii	4biw	model_0083	atp	10	-4.8	4.8
Acinetobacter_baumannii	4biw	model_0083	atp	11	-4.8	8
Acinetobacter_baumannii	4biw	model_0083	atp	12	-4.5	7.8
Acinetobacter_baumannii	4biw	model_0083	atp	13	-4.4	6.7
Acinetobacter_baumannii	4biw	model_0083	atp	14	-4.3	9.3
Acinetobacter_baumannii	4biw	model_0083	atp	15	-4.3	6.9
Acinetobacter_baumannii	4biw	model_0083	atp	16	-4.3	6.5
Acinetobacter_baumannii	4biw	model_0083	atp	17	-4.2	8.2
Acinetobacter_baumannii	4biw	model_0083	atp	18	-4.2	8.7
Acinetobacter_baumannii	4biw	model_0083	atp	19	-3.8	4
Acinetobacter_baumannii	4biw	model_0084	atp	1	-7.5	0
Acinetobacter_baumannii	4biw	model_0084	atp	2	-6.9	2.2
Acinetobacter_baumannii	4biw	model_0084	atp	3	-6.4	3.5
Acinetobacter_baumannii	4biw	model_0084	atp	4	-6.3	4.4
Acinetobacter_baumannii	4biw	model_0084	atp	5	-5.8	3.9
Acinetobacter_baumannii	4biw	model_0084	atp	6	-4.4	8.3
Acinetobacter_baumannii	4biw	model_0085	atp	1	-8.2	0
Acinetobacter_baumannii	4biw	model_0085	atp	2	-7.5	2.6
Acinetobacter_baumannii	4biw	model_0085	atp	3	-7	2.2
Acinetobacter_baumannii	4biw	model_0085	atp	4	-6.6	4.1
Acinetobacter_baumannii	4biw	model_0085	atp	5	-5.3	8.6
Acinetobacter_baumannii	4biw	model_0085	atp	6	-4.7	7
Acinetobacter_baumannii	4biw	model_0085	atp	7	-4.6	8.6
Acinetobacter_baumannii	4biw	model_0085	atp	8	-4.5	7.8
Acinetobacter_baumannii	4biw	model_0085	atp	9	-4.5	9.1
Acinetobacter_baumannii	4biw	model_0085	atp	10	-4.3	7.4
Acinetobacter_baumannii	4biw	model_0085	atp	11	-4.3	7.8
Acinetobacter_baumannii	4biw	model_0085	atp	12	-4.2	7.4
Acinetobacter_baumannii	4biw	model_0085	atp	13	-4.2	4.8
Acinetobacter_baumannii	4biw	model_0085	atp	14	-4.1	6.2
Acinetobacter_baumannii	4biw	model_0085	atp	15	-4	4.2
Acinetobacter_baumannii	4biw	model_0085	atp	16	-3.9	8.1
Acinetobacter_baumannii	4biw	model_0085	atp	17	-3.8	5.7
Acinetobacter_baumannii	4biw	model_0086	atp	1	-7.2	0
Acinetobacter_baumannii	4biw	model_0086	atp	2	-6.7	2.9
Acinetobacter_baumannii	4biw	model_0086	atp	3	-6.2	3.1
Acinetobacter_baumannii	4biw	model_0086	atp	4	-6.1	3.3
Acinetobacter_baumannii	4biw	model_0086	atp	5	-5.6	2.4
Acinetobacter_baumannii	4biw	model_0086	atp	6	-5.5	7.6
Acinetobacter_baumannii	4biw	model_0086	atp	7	-5.5	2.1
Acinetobacter_baumannii	4biw	model_0086	atp	8	-5.3	2.5
Acinetobacter_baumannii	4biw	model_0086	atp	9	-5	5.5
Acinetobacter_baumannii	4biw	model_0086	atp	10	-4.7	4.4
Acinetobacter_baumannii	4biw	model_0086	atp	11	-4.6	5.5
Acinetobacter_baumannii	4biw	model_0086	atp	12	-4.3	6.6
Acinetobacter_baumannii	4biw	model_0086	atp	13	-4.2	8
Acinetobacter_baumannii	4biw	model_0086	atp	14	-4.2	6.7
Acinetobacter_baumannii	4biw	model_0086	atp	15	-3.5	4.9
Acinetobacter_baumannii	4biw	model_0087	atp	1	-7.5	0
Acinetobacter_baumannii	4biw	model_0087	atp	2	-7	2.8
Acinetobacter_baumannii	4biw	model_0087	atp	3	-7	2
Acinetobacter_baumannii	4biw	model_0087	atp	4	-6.3	2.1
Acinetobacter_baumannii	4biw	model_0087	atp	5	-6.3	2.4
Acinetobacter_baumannii	4biw	model_0087	atp	6	-5.9	2.2
Acinetobacter_baumannii	4biw	model_0087	atp	7	-4.8	2.8
Acinetobacter_baumannii	4biw	model_0087	atp	8	-3.1	6.6
Acinetobacter_baumannii	4biw	model_0087	atp	9	-2.5	6.2
Acinetobacter_baumannii	4biw	model_0088	atp	1	-8.3	0
Acinetobacter_baumannii	4biw	model_0088	atp	2	-8.2	2
Acinetobacter_baumannii	4biw	model_0088	atp	3	-7.2	2.5
Acinetobacter_baumannii	4biw	model_0088	atp	4	-6.7	4.8
Acinetobacter_baumannii	4biw	model_0088	atp	5	-6.1	7.4
Acinetobacter_baumannii	4biw	model_0088	atp	6	-6.1	3.8
Acinetobacter_baumannii	4biw	model_0088	atp	7	-6.1	2.5
Acinetobacter_baumannii	4biw	model_0088	atp	8	-5.3	8.3
Acinetobacter_baumannii	4biw	model_0088	atp	9	-5.2	7.3
Acinetobacter_baumannii	4biw	model_0089	atp	1	-7.2	0
Acinetobacter_baumannii	4biw	model_0089	atp	2	-6.6	2
Acinetobacter_baumannii	4biw	model_0089	atp	3	-6.3	2.4
Acinetobacter_baumannii	4biw	model_0089	atp	4	-6.3	7.8
Acinetobacter_baumannii	4biw	model_0089	atp	5	-6	2.1
Acinetobacter_baumannii	4biw	model_0089	atp	6	-6	8.3
Acinetobacter_baumannii	4biw	model_0089	atp	7	-5.9	8.6
Acinetobacter_baumannii	4biw	model_0089	atp	8	-4.6	8
Acinetobacter_baumannii	4biw	model_0089	atp	9	-3.7	2.6
Acinetobacter_baumannii	4biw	model_0089	atp	10	-2.9	7.4
Acinetobacter_baumannii	4biw	model_0089	atp	11	-2.2	8.1
Acinetobacter_baumannii	4biw	model_0089	atp	12	-1.2	8.6
Acinetobacter_baumannii	4biw	model_0090	atp	1	-6.6	0
Acinetobacter_baumannii	4biw	model_0090	atp	2	-5.7	5
Acinetobacter_baumannii	4biw	model_0090	atp	3	-5.5	5.3
Acinetobacter_baumannii	4biw	model_0090	atp	4	-5.2	2.8
Acinetobacter_baumannii	4biw	model_0090	atp	5	-4.8	4.9
Acinetobacter_baumannii	4biw	model_0090	atp	6	-4.7	7.5
Acinetobacter_baumannii	4biw	model_0090	atp	7	-4.7	5.7
Acinetobacter_baumannii	4biw	model_0090	atp	8	-4.7	5.5
Acinetobacter_baumannii	4biw	model_0090	atp	9	-4.7	6.1
Acinetobacter_baumannii	4biw	model_0090	atp	10	-4	8.5
Acinetobacter_baumannii	4biw	model_0090	atp	11	-4	6.7
Acinetobacter_baumannii	4biw	model_0090	atp	12	-3.4	4.1
Acinetobacter_baumannii	4biw	model_0091	atp	1	-7	0
Acinetobacter_baumannii	4biw	model_0091	atp	2	-6.8	2.1
Acinetobacter_baumannii	4biw	model_0091	atp	3	-6.6	2.4
Acinetobacter_baumannii	4biw	model_0091	atp	4	-6.5	3.7
Acinetobacter_baumannii	4biw	model_0091	atp	5	-6.4	4.2
Acinetobacter_baumannii	4biw	model_0091	atp	6	-6.2	2
Acinetobacter_baumannii	4biw	model_0091	atp	7	-5.9	2.3
Acinetobacter_baumannii	4biw	model_0091	atp	8	-5.5	2.3
Acinetobacter_baumannii	4biw	model_0091	atp	9	-5.3	3
Acinetobacter_baumannii	4biw	model_0091	atp	10	-5.3	2.4
Acinetobacter_baumannii	4biw	model_0091	atp	11	-5	7.5
Acinetobacter_baumannii	4biw	model_0092	atp	1	-6.5	0
Acinetobacter_baumannii	4biw	model_0092	atp	2	-6	2.3
Acinetobacter_baumannii	4biw	model_0092	atp	3	-5.8	4.6
Acinetobacter_baumannii	4biw	model_0092	atp	4	-5.6	2.7
Acinetobacter_baumannii	4biw	model_0092	atp	5	-5.6	2.9
Acinetobacter_baumannii	4biw	model_0092	atp	6	-5.3	2.5
Acinetobacter_baumannii	4biw	model_0092	atp	7	-5.3	5.2
Acinetobacter_baumannii	4biw	model_0092	atp	8	-5.2	2.6
Acinetobacter_baumannii	4biw	model_0092	atp	9	-4.9	2.7
Acinetobacter_baumannii	4biw	model_0092	atp	10	-4.5	7.5
Acinetobacter_baumannii	4biw	model_0092	atp	11	-2.7	7.2
Acinetobacter_baumannii	4biw	model_0093	atp	1	-6.9	0
Acinetobacter_baumannii	4biw	model_0093	atp	2	-6.7	2.1
Acinetobacter_baumannii	4biw	model_0093	atp	3	-6.7	3
Acinetobacter_baumannii	4biw	model_0093	atp	4	-6.1	2.9
Acinetobacter_baumannii	4biw	model_0093	atp	5	-5.7	2.2
Acinetobacter_baumannii	4biw	model_0093	atp	6	-5.6	4.5
Acinetobacter_baumannii	4biw	model_0093	atp	7	-5.4	6.8
Acinetobacter_baumannii	4biw	model_0093	atp	8	-5.1	4.1
Acinetobacter_baumannii	4biw	model_0093	atp	9	-4.6	5.3
Acinetobacter_baumannii	4biw	model_0093	atp	10	-4.5	3.1
Acinetobacter_baumannii	4biw	model_0093	atp	11	-4.4	6
Acinetobacter_baumannii	4biw	model_0093	atp	12	-4.2	6.4
Acinetobacter_baumannii	4biw	model_0093	atp	13	-4	6.7
Acinetobacter_baumannii	4biw	model_0093	atp	14	-3.9	8.2
Acinetobacter_baumannii	4biw	model_0094	atp	1	-7.3	0
Acinetobacter_baumannii	4biw	model_0094	atp	2	-7.1	2.3
Acinetobacter_baumannii	4biw	model_0094	atp	3	-7	3.5
Acinetobacter_baumannii	4biw	model_0094	atp	4	-6.3	3.1
Acinetobacter_baumannii	4biw	model_0094	atp	5	-6.1	7.2
Acinetobacter_baumannii	4biw	model_0094	atp	6	-5.8	2.8
Acinetobacter_baumannii	4biw	model_0094	atp	7	-5.8	2
Acinetobacter_baumannii	4biw	model_0094	atp	8	-5.6	3
Acinetobacter_baumannii	4biw	model_0094	atp	9	-5.3	3.9
Acinetobacter_baumannii	4biw	model_0094	atp	10	-3.8	7.7
Acinetobacter_baumannii	4biw	model_0094	atp	11	-3.3	6.9
Acinetobacter_baumannii	4biw	model_0095	atp	1	-7.8	0
Acinetobacter_baumannii	4biw	model_0095	atp	2	-7.8	2.5
Acinetobacter_baumannii	4biw	model_0095	atp	3	-6.6	3
Acinetobacter_baumannii	4biw	model_0095	atp	4	-6.6	3.6
Acinetobacter_baumannii	4biw	model_0095	atp	5	-6.4	8.2
Acinetobacter_baumannii	4biw	model_0095	atp	6	-6.2	2.2
Acinetobacter_baumannii	4biw	model_0095	atp	7	-6.2	7.6
Acinetobacter_baumannii	4biw	model_0095	atp	8	-5.7	2.5
Acinetobacter_baumannii	4biw	model_0095	atp	9	-5.7	7.6
Acinetobacter_baumannii	4biw	model_0095	atp	10	-5.7	7.6
Acinetobacter_baumannii	4biw	model_0095	atp	11	-5.6	3.8
Acinetobacter_baumannii	4biw	model_0095	atp	12	-5.5	7.2
Acinetobacter_baumannii	4biw	model_0095	atp	13	-5.4	7.3
Acinetobacter_baumannii	4biw	model_0095	atp	14	-5.3	2.2
Acinetobacter_baumannii	4biw	model_0095	atp	15	-5.1	7.1
Acinetobacter_baumannii	4biw	model_0095	atp	16	-3.9	4.8
Acinetobacter_baumannii	4biw	model_0096	atp	1	-7.9	0
Acinetobacter_baumannii	4biw	model_0096	atp	2	-7.2	4.3
Acinetobacter_baumannii	4biw	model_0096	atp	3	-6.3	4.9
Acinetobacter_baumannii	4biw	model_0096	atp	4	-6.2	6.3
Acinetobacter_baumannii	4biw	model_0096	atp	5	-5.7	7.2
Acinetobacter_baumannii	4biw	model_0096	atp	6	-5.3	4.4
Acinetobacter_baumannii	4biw	model_0096	atp	7	-5.2	3.5
Acinetobacter_baumannii	4biw	model_0096	atp	8	-3.4	6.6
Acinetobacter_baumannii	4biw	model_0096	atp	9	-3.3	4
Acinetobacter_baumannii	4biw	model_0097	atp	1	-9.4	0
Acinetobacter_baumannii	4biw	model_0097	atp	2	-8.6	2.2
Acinetobacter_baumannii	4biw	model_0097	atp	3	-8.2	2.4
Acinetobacter_baumannii	4biw	model_0097	atp	4	-8	2.8
Acinetobacter_baumannii	4biw	model_0097	atp	5	-7.9	2
Acinetobacter_baumannii	4biw	model_0097	atp	6	-7.8	3.8
Acinetobacter_baumannii	4biw	model_0097	atp	7	-7.6	3.2
Acinetobacter_baumannii	4biw	model_0097	atp	8	-7.3	3.3
Acinetobacter_baumannii	4biw	model_0097	atp	9	-7.2	3.5
Acinetobacter_baumannii	4biw	model_0097	atp	10	-6.4	5.7
Acinetobacter_baumannii	4biw	model_0097	atp	11	-4.9	6.8
Acinetobacter_baumannii	4biw	model_0097	atp	12	-4.6	8
Acinetobacter_baumannii	4biw	model_0097	atp	13	-4.5	6.4
Acinetobacter_baumannii	4biw	model_0098	atp	1	-8.5	0
Acinetobacter_baumannii	4biw	model_0098	atp	2	-8.4	2.2
Acinetobacter_baumannii	4biw	model_0098	atp	3	-8.1	3.3
Acinetobacter_baumannii	4biw	model_0098	atp	4	-7.5	2.5
Acinetobacter_baumannii	4biw	model_0098	atp	5	-7.3	2.4
Acinetobacter_baumannii	4biw	model_0098	atp	6	-6.9	2.1
Acinetobacter_baumannii	4biw	model_0098	atp	7	-6.8	6.9
Acinetobacter_baumannii	4biw	model_0098	atp	8	-6	6.5
Acinetobacter_baumannii	4biw	model_0098	atp	9	-5.8	4.6
Acinetobacter_baumannii	4biw	model_0099	atp	1	-7.4	0
Acinetobacter_baumannii	4biw	model_0099	atp	2	-7.4	2.1
Acinetobacter_baumannii	4biw	model_0099	atp	3	-7	2.7
Acinetobacter_baumannii	4biw	model_0099	atp	4	-6.5	2.8
Acinetobacter_baumannii	4biw	model_0099	atp	5	-6	4.2
Acinetobacter_baumannii	4biw	model_0099	atp	6	-6	3
Acinetobacter_baumannii	4biw	model_0099	atp	7	-4.5	5
Acinetobacter_baumannii	4biw	model_0099	atp	8	-4.3	7.8
Acinetobacter_baumannii	4biw	model_0100	atp	1	-7.7	0
Acinetobacter_baumannii	4biw	model_0100	atp	2	-7.2	2.1
Acinetobacter_baumannii	4biw	model_0100	atp	3	-6.4	6.8
Acinetobacter_baumannii	4biw	model_0100	atp	4	-5.9	2
Acinetobacter_baumannii	4biw	model_0100	atp	5	-5.9	2.5
Acinetobacter_baumannii	4biw	model_0100	atp	6	-5.4	3.4
Acinetobacter_baumannii	4biw	model_0100	atp	7	-4.6	7.4
Acinetobacter_baumannii	4biw	model_0100	atp	8	-3.9	8.4
Acinetobacter_baumannii	4biw	model_0100	atp	9	-3.8	9
Acinetobacter_baumannii	4biw	model_0101	atp	1	-6.1	0
Acinetobacter_baumannii	4biw	model_0101	atp	2	-5.1	2.7
Acinetobacter_baumannii	4biw	model_0101	atp	3	-4	3.7
Acinetobacter_baumannii	4biw	model_0101	atp	4	-3.9	3.6
Acinetobacter_baumannii	4biw	model_0101	atp	5	-3.4	4
Acinetobacter_baumannii	4biw	model_0101	atp	6	-3.1	4.4
Acinetobacter_baumannii	4biw	model_0101	atp	7	-3	4.5
Acinetobacter_baumannii	4biw	model_0101	atp	8	-3	5.5
Acinetobacter_baumannii	4biw	model_0101	atp	9	-2.8	3.7
Acinetobacter_baumannii	4biw	model_0101	atp	10	-2.8	4
Acinetobacter_baumannii	4biw	model_0101	atp	11	-2.6	2.8
Acinetobacter_baumannii	4biw	model_0101	atp	12	-2.4	3.2
Acinetobacter_baumannii	4biw	model_0101	atp	13	-2.2	5.7
Acinetobacter_baumannii	4biw	model_0101	atp	14	-2.1	5.9
Acinetobacter_baumannii	4biw	model_0101	atp	15	-2.1	4
Acinetobacter_baumannii	4biw	model_0101	atp	16	-2.1	4.9
Acinetobacter_baumannii	4biw	model_0101	atp	17	-1.6	4.3
Acinetobacter_baumannii	4biw	model_0101	atp	18	-1.5	4.1
Acinetobacter_baumannii	4biw	model_0101	atp	19	-1.4	4.9
Acinetobacter_baumannii	4biw	model_0101	atp	20	-1	5.5
Acinetobacter_baumannii	4biw	model_0101	atp	21	-0.8	5.9
Acinetobacter_baumannii	4biw	model_0101	atp	22	-0.7	5.1
Acinetobacter_baumannii	4biw	model_0101	atp	23	-0.4	4.1
Acinetobacter_baumannii	4biw	model_0101	atp	24	-0.2	6.9
Acinetobacter_baumannii	4biw	model_0101	atp	25	-0.1	5.9
Acinetobacter_baumannii	4biw	model_0101	atp	26	0	4.2
Acinetobacter_baumannii	4biw	model_0101	atp	27	1.3	5.4
Acinetobacter_baumannii	4biw	model_0102	atp	1	-7.7	0
Acinetobacter_baumannii	4biw	model_0102	atp	2	-7.5	2.1
Acinetobacter_baumannii	4biw	model_0102	atp	3	-7.4	2.1
Acinetobacter_baumannii	4biw	model_0102	atp	4	-6.2	2.9
Acinetobacter_baumannii	4biw	model_0102	atp	5	-6.1	3.6
Acinetobacter_baumannii	4biw	model_0102	atp	6	-5.3	8.1
Acinetobacter_baumannii	4biw	model_0102	atp	7	-5.3	8.4
Acinetobacter_baumannii	4biw	model_0102	atp	8	-5.1	4.7
Acinetobacter_baumannii	4biw	model_0102	atp	9	-4.8	5.3
Acinetobacter_baumannii	4biw	model_0103	atp	1	-8.8	0
Acinetobacter_baumannii	4biw	model_0103	atp	2	-8.1	2.1
Acinetobacter_baumannii	4biw	model_0103	atp	3	-8.1	2.2
Acinetobacter_baumannii	4biw	model_0103	atp	4	-8.1	3.3
Acinetobacter_baumannii	4biw	model_0103	atp	5	-7.5	4.5
Acinetobacter_baumannii	4biw	model_0103	atp	6	-7.5	3.5
Acinetobacter_baumannii	4biw	model_0103	atp	7	-4.1	2.6
Acinetobacter_baumannii	4biw	model_0104	atp	1	-9.1	0
Acinetobacter_baumannii	4biw	model_0104	atp	2	-7.9	2.2
Acinetobacter_baumannii	4biw	model_0104	atp	3	-7.7	7.3
Acinetobacter_baumannii	4biw	model_0104	atp	4	-7.2	2.6
Acinetobacter_baumannii	4biw	model_0104	atp	5	-7.2	7.5
Acinetobacter_baumannii	4biw	model_0104	atp	6	-6.6	4.1
Acinetobacter_baumannii	4biw	model_0104	atp	7	-6.5	7.7
Acinetobacter_baumannii	4biw	model_0104	atp	8	-5.9	3
Acinetobacter_baumannii	4biw	model_0104	atp	9	-5.5	6.5
Acinetobacter_baumannii	4biw	model_0104	atp	10	-5.3	6.9
Acinetobacter_baumannii	4biw	model_0104	atp	11	-5	4.7
Acinetobacter_baumannii	4biw	model_0104	atp	12	-4.6	8.2
Acinetobacter_baumannii	4biw	model_0105	atp	1	-6.6	0
Acinetobacter_baumannii	4biw	model_0105	atp	2	-6.5	3.7
Acinetobacter_baumannii	4biw	model_0105	atp	3	-6.4	2.4
Acinetobacter_baumannii	4biw	model_0105	atp	4	-6.1	3.8
Acinetobacter_baumannii	4biw	model_0105	atp	5	-6.1	3.2
Acinetobacter_baumannii	4biw	model_0105	atp	6	-6	2.4
Acinetobacter_baumannii	4biw	model_0105	atp	7	-5.9	3.8
Acinetobacter_baumannii	4biw	model_0105	atp	8	-5.9	2.2
Acinetobacter_baumannii	4biw	model_0105	atp	9	-5.8	8.1
Acinetobacter_baumannii	4biw	model_0105	atp	10	-5.7	2.9
Acinetobacter_baumannii	4biw	model_0105	atp	11	-5.6	3.7
Acinetobacter_baumannii	4biw	model_0105	atp	12	-4.6	5.8
Acinetobacter_baumannii	4biw	model_0105	atp	13	-4.6	3.7
Acinetobacter_baumannii	4biw	model_0105	atp	14	-4.3	3.4
Acinetobacter_baumannii	4biw	model_0105	atp	15	-3.9	6.8
Acinetobacter_baumannii	4biw	model_0106	atp	1	-7.6	0
Acinetobacter_baumannii	4biw	model_0106	atp	2	-7.3	3.1
Acinetobacter_baumannii	4biw	model_0106	atp	3	-7.2	2
Acinetobacter_baumannii	4biw	model_0106	atp	4	-7	2.6
Acinetobacter_baumannii	4biw	model_0106	atp	5	-6.4	3
Acinetobacter_baumannii	4biw	model_0106	atp	6	-6.2	2.8
Acinetobacter_baumannii	4biw	model_0106	atp	7	-5.5	5.1
Acinetobacter_baumannii	4biw	model_0106	atp	8	-5.4	3.1
Acinetobacter_baumannii	4biw	model_0107	atp	1	-7.3	0
Acinetobacter_baumannii	4biw	model_0107	atp	2	-6.6	2
Acinetobacter_baumannii	4biw	model_0107	atp	3	-6.3	4.5
Acinetobacter_baumannii	4biw	model_0107	atp	4	-6.2	2.8
Acinetobacter_baumannii	4biw	model_0107	atp	5	-6	3.3
Acinetobacter_baumannii	4biw	model_0107	atp	6	-5.8	2.9
Acinetobacter_baumannii	4biw	model_0107	atp	7	-5.5	2.2
Acinetobacter_baumannii	4biw	model_0107	atp	8	-5.1	5.8
Acinetobacter_baumannii	4biw	model_0107	atp	9	-4.5	7.1
Acinetobacter_baumannii	4biw	model_0107	atp	10	-3.9	6
Acinetobacter_baumannii	4biw	model_0107	atp	11	-1.5	7.5
Acinetobacter_baumannii	4biw	model_0108	atp	1	-7.9	0
Acinetobacter_baumannii	4biw	model_0108	atp	2	-7.5	2.1
Acinetobacter_baumannii	4biw	model_0108	atp	3	-7.5	3.2
Acinetobacter_baumannii	4biw	model_0108	atp	4	-7.4	3.6
Acinetobacter_baumannii	4biw	model_0108	atp	5	-7	2.2
Acinetobacter_baumannii	4biw	model_0108	atp	6	-6.9	2.3
Acinetobacter_baumannii	4biw	model_0108	atp	7	-6.1	2.9
Acinetobacter_baumannii	4biw	model_0108	atp	8	-4.4	6.8
Acinetobacter_baumannii	4biw	model_0108	atp	9	-4	7
Acinetobacter_baumannii	4biw	model_0108	atp	10	-3.8	6.6
Acinetobacter_baumannii	4biw	model_0109	atp	1	-8	0
Acinetobacter_baumannii	4biw	model_0109	atp	2	-7.9	2.2
Acinetobacter_baumannii	4biw	model_0109	atp	3	-7.5	2.3
Acinetobacter_baumannii	4biw	model_0109	atp	4	-7.1	2.7
Acinetobacter_baumannii	4biw	model_0109	atp	5	-6.9	3.1
Acinetobacter_baumannii	4biw	model_0109	atp	6	-6.7	2
Acinetobacter_baumannii	4biw	model_0109	atp	7	-5.4	7
Acinetobacter_baumannii	4biw	model_0109	atp	8	-4.3	6.7
Acinetobacter_baumannii	4biw	model_0109	atp	9	-4.1	3.9
Acinetobacter_baumannii	4biw	model_0110	atp	1	-7.8	0
Acinetobacter_baumannii	4biw	model_0110	atp	2	-7.3	5.4
Acinetobacter_baumannii	4biw	model_0110	atp	3	-7.3	2.5
Acinetobacter_baumannii	4biw	model_0110	atp	4	-7	3.9
Acinetobacter_baumannii	4biw	model_0110	atp	5	-6.8	3.4
Acinetobacter_baumannii	4biw	model_0110	atp	6	-6.1	4.2
Acinetobacter_baumannii	4biw	model_0110	atp	7	-6.1	5.1
Acinetobacter_baumannii	4biw	model_0110	atp	8	-5.5	2.7
Acinetobacter_baumannii	4biw	model_0110	atp	9	-5.4	3.9
Acinetobacter_baumannii	4biw	model_0110	atp	10	-5.2	4.7
Acinetobacter_baumannii	4biw	model_0110	atp	11	-3.9	6.2
Acinetobacter_baumannii	4biw	model_0111	atp	1	-8.4	0
Acinetobacter_baumannii	4biw	model_0111	atp	2	-7.7	2.5
Acinetobacter_baumannii	4biw	model_0111	atp	3	-7.6	2.7
Acinetobacter_baumannii	4biw	model_0111	atp	4	-7	2.4
Acinetobacter_baumannii	4biw	model_0111	atp	5	-6.8	2.5
Acinetobacter_baumannii	4biw	model_0111	atp	6	-6.5	3.6
Acinetobacter_baumannii	4biw	model_0111	atp	7	-6.5	3.3
Acinetobacter_baumannii	4biw	model_0111	atp	8	-5.4	4.4
Acinetobacter_baumannii	4biw	model_0111	atp	9	-4.9	4.2
Acinetobacter_baumannii	4biw	model_0111	atp	10	-4.8	7.8
Acinetobacter_baumannii	4biw	model_0111	atp	11	-4.7	7.2
Acinetobacter_baumannii	4biw	model_0111	atp	12	-3.2	7.2
Acinetobacter_baumannii	4biw	model_0112	atp	1	-6.9	0
Acinetobacter_baumannii	4biw	model_0112	atp	2	-6.9	2.8
Acinetobacter_baumannii	4biw	model_0112	atp	3	-6.8	2.9
Acinetobacter_baumannii	4biw	model_0112	atp	4	-6.3	2.1
Acinetobacter_baumannii	4biw	model_0112	atp	5	-6.2	3.4
Acinetobacter_baumannii	4biw	model_0112	atp	6	-5.9	2.6
Acinetobacter_baumannii	4biw	model_0112	atp	7	-5.8	2.1
Acinetobacter_baumannii	4biw	model_0112	atp	8	-5.2	5.9
Acinetobacter_baumannii	4biw	model_0112	atp	9	-4.9	8.8
Acinetobacter_baumannii	4biw	model_0112	atp	10	-4.4	3
Acinetobacter_baumannii	4biw	model_0112	atp	11	-4.3	8.7
Acinetobacter_baumannii	4biw	model_0112	atp	12	-4.1	5.1
Acinetobacter_baumannii	4biw	model_0112	atp	13	-3.9	8.5
Acinetobacter_baumannii	4biw	model_0112	atp	14	-3.9	8.4
Acinetobacter_baumannii	4biw	model_0113	atp	1	-7	0
Acinetobacter_baumannii	4biw	model_0113	atp	2	-6.8	2.4
Acinetobacter_baumannii	4biw	model_0113	atp	3	-6.3	2.2
Acinetobacter_baumannii	4biw	model_0113	atp	4	-6	4.1
Acinetobacter_baumannii	4biw	model_0113	atp	5	-5.8	2.6
Acinetobacter_baumannii	4biw	model_0113	atp	6	-5.4	3.1
Acinetobacter_baumannii	4biw	model_0113	atp	7	-4.8	7.1
Acinetobacter_baumannii	4biw	model_0113	atp	8	-3.7	6
Acinetobacter_baumannii	4biw	model_0113	atp	9	-3.3	6.9
Acinetobacter_baumannii	4biw	model_0114	atp	1	-7.6	0
Acinetobacter_baumannii	4biw	model_0114	atp	2	-7.3	2.6
Acinetobacter_baumannii	4biw	model_0114	atp	3	-7.1	2
Acinetobacter_baumannii	4biw	model_0114	atp	4	-7.1	2.8
Acinetobacter_baumannii	4biw	model_0114	atp	5	-7	2.4
Acinetobacter_baumannii	4biw	model_0114	atp	6	-6.2	2
Acinetobacter_baumannii	4biw	model_0115	atp	1	-7.9	0
Acinetobacter_baumannii	4biw	model_0115	atp	2	-7.6	2.7
Acinetobacter_baumannii	4biw	model_0115	atp	3	-7.1	2.4
Acinetobacter_baumannii	4biw	model_0115	atp	4	-7.1	2.1
Acinetobacter_baumannii	4biw	model_0115	atp	5	-7.1	2.2
Acinetobacter_baumannii	4biw	model_0115	atp	6	-6.4	3.1
Acinetobacter_baumannii	4biw	model_0115	atp	7	-5.9	2
Acinetobacter_baumannii	4biw	model_0115	atp	8	-5.6	7.8
Acinetobacter_baumannii	4biw	model_0115	atp	9	-5.3	3.1
Acinetobacter_baumannii	4biw	model_0115	atp	10	-3.1	6.6
Acinetobacter_baumannii	4biw	model_0116	atp	1	-6.7	0
Acinetobacter_baumannii	4biw	model_0116	atp	2	-6.3	2.3
Acinetobacter_baumannii	4biw	model_0116	atp	3	-6.1	2.5
Acinetobacter_baumannii	4biw	model_0116	atp	4	-5.8	2.2
Acinetobacter_baumannii	4biw	model_0116	atp	5	-5.7	2.7
Acinetobacter_baumannii	4biw	model_0116	atp	6	-5.5	2.7
Acinetobacter_baumannii	4biw	model_0116	atp	7	-5.1	3
Acinetobacter_baumannii	4biw	model_0116	atp	8	-4.8	2.8
Acinetobacter_baumannii	4biw	model_0116	atp	9	-4.1	5.2
Acinetobacter_baumannii	4biw	model_0116	atp	10	-3.9	3.1
Acinetobacter_baumannii	4biw	model_0116	atp	11	-3.5	3.3
Acinetobacter_baumannii	4biw	model_0117	atp	1	-7.4	0
Acinetobacter_baumannii	4biw	model_0117	atp	2	-7.4	2.4
Acinetobacter_baumannii	4biw	model_0117	atp	3	-7.1	3.1
Acinetobacter_baumannii	4biw	model_0117	atp	4	-7	2.3
Acinetobacter_baumannii	4biw	model_0117	atp	5	-6.4	2.8
Acinetobacter_baumannii	4biw	model_0117	atp	6	-6	2.9
Acinetobacter_baumannii	4biw	model_0117	atp	7	-5	4.6
Acinetobacter_baumannii	4biw	model_0117	atp	8	-5	7.6
Acinetobacter_baumannii	4biw	model_0117	atp	9	-4.9	4
Acinetobacter_baumannii	4biw	model_0117	atp	10	-1.3	7.7
Acinetobacter_baumannii	4biw	model_0118	atp	1	-7.6	0
Acinetobacter_baumannii	4biw	model_0118	atp	2	-6.6	7.7
Acinetobacter_baumannii	4biw	model_0118	atp	3	-5.5	8.2
Acinetobacter_baumannii	4biw	model_0118	atp	4	-5.4	3.1
Acinetobacter_baumannii	4biw	model_0118	atp	5	-5.2	8.3
Acinetobacter_baumannii	4biw	model_0118	atp	6	-4.9	9.2
Acinetobacter_baumannii	4biw	model_0118	atp	7	-4.8	4.1
Acinetobacter_baumannii	4biw	model_0118	atp	8	-4.8	2.6
Acinetobacter_baumannii	4biw	model_0118	atp	9	-4.7	7.5
Acinetobacter_baumannii	4biw	model_0118	atp	10	-4.7	2
Acinetobacter_baumannii	4biw	model_0118	atp	11	-4.3	4.7
Acinetobacter_baumannii	4biw	model_0118	atp	12	-4.1	9.4
Acinetobacter_baumannii	4biw	model_0118	atp	13	-3.8	5.2
Acinetobacter_baumannii	4biw	model_0118	atp	14	-2.5	5.4
Acinetobacter_baumannii	4biw	model_0118	atp	15	-1	7.3
Acinetobacter_baumannii	4biw	model_0119	atp	1	-7.1	0
Acinetobacter_baumannii	4biw	model_0119	atp	2	-7	2.4
Acinetobacter_baumannii	4biw	model_0119	atp	3	-6.9	3.7
Acinetobacter_baumannii	4biw	model_0119	atp	4	-6.6	4.6
Acinetobacter_baumannii	4biw	model_0119	atp	5	-6.4	2.4
Acinetobacter_baumannii	4biw	model_0119	atp	6	-5.6	3.3
Acinetobacter_baumannii	4biw	model_0119	atp	7	-5.5	4.8
Acinetobacter_baumannii	4biw	model_0119	atp	8	-5.4	3.3
Acinetobacter_baumannii	4biw	model_0120	atp	1	-8.4	0
Acinetobacter_baumannii	4biw	model_0120	atp	2	-7.8	2.4
Acinetobacter_baumannii	4biw	model_0120	atp	3	-6.5	4.1
Acinetobacter_baumannii	4biw	model_0120	atp	4	-5.7	8.3
Acinetobacter_baumannii	4biw	model_0120	atp	5	-5.6	2.3
Acinetobacter_baumannii	4biw	model_0120	atp	6	-5.4	7.3
Acinetobacter_baumannii	4biw	model_0120	atp	7	-5.1	4.7
Acinetobacter_baumannii	4biw	model_0120	atp	8	-5.1	3.5
Acinetobacter_baumannii	4biw	model_0120	atp	9	-5.1	7.8
Acinetobacter_baumannii	4biw	model_0120	atp	10	-4.9	7.3
Acinetobacter_baumannii	4biw	model_0120	atp	11	-4.9	7.4
Acinetobacter_baumannii	4biw	model_0120	atp	12	-4.8	8.3
Acinetobacter_baumannii	4biw	model_0120	atp	13	-3.7	4.1
Acinetobacter_baumannii	4biw	model_0120	atp	14	-3.5	6.5
Acinetobacter_baumannii	4biw	model_0120	atp	15	-1	7.1
Acinetobacter_baumannii	4biw	model_0121	atp	1	-7.6	0
Acinetobacter_baumannii	4biw	model_0121	atp	2	-7.5	4.3
Acinetobacter_baumannii	4biw	model_0121	atp	3	-7	3.2
Acinetobacter_baumannii	4biw	model_0121	atp	4	-6.7	3.7
Acinetobacter_baumannii	4biw	model_0121	atp	5	-6.6	5
Acinetobacter_baumannii	4biw	model_0121	atp	6	-6.5	4.5
Acinetobacter_baumannii	4biw	model_0121	atp	7	-6.2	3.8
Acinetobacter_baumannii	4biw	model_0121	atp	8	-6	4.9
Acinetobacter_baumannii	4biw	model_0121	atp	9	-5.8	5
Acinetobacter_baumannii	4biw	model_0121	atp	10	-5.8	5
Acinetobacter_baumannii	4biw	model_0121	atp	11	-5.4	6.4
Acinetobacter_baumannii	4biw	model_0122	atp	1	-6.3	0
Acinetobacter_baumannii	4biw	model_0122	atp	2	-5.7	5.4
Acinetobacter_baumannii	4biw	model_0122	atp	3	-5.7	2.8
Acinetobacter_baumannii	4biw	model_0122	atp	4	-5.6	6.4
Acinetobacter_baumannii	4biw	model_0122	atp	5	-5.6	2.9
Acinetobacter_baumannii	4biw	model_0122	atp	6	-4.9	6.9
Acinetobacter_baumannii	4biw	model_0122	atp	7	-4.8	7.6
Acinetobacter_baumannii	4biw	model_0122	atp	8	-4.6	3.3
Acinetobacter_baumannii	4biw	model_0122	atp	9	-4.1	3.1
Acinetobacter_baumannii	4biw	model_0122	atp	10	-4.1	7.8
Acinetobacter_baumannii	4biw	model_0122	atp	11	-4	7.7
Acinetobacter_baumannii	4biw	model_0122	atp	12	-4	4.2
Acinetobacter_baumannii	4biw	model_0122	atp	13	-4	7.9
Acinetobacter_baumannii	4biw	model_0122	atp	14	-3.9	4.2
Acinetobacter_baumannii	4biw	model_0122	atp	15	-3.8	4.8
Acinetobacter_baumannii	4biw	model_0123	atp	1	-8.6	0
Acinetobacter_baumannii	4biw	model_0123	atp	2	-7.7	3.8
Acinetobacter_baumannii	4biw	model_0123	atp	3	-7.5	4.4
Acinetobacter_baumannii	4biw	model_0123	atp	4	-7.3	2.2
Acinetobacter_baumannii	4biw	model_0123	atp	5	-7	2.1
Acinetobacter_baumannii	4biw	model_0123	atp	6	-5.9	3.2
Acinetobacter_baumannii	4biw	model_0123	atp	7	-5.5	7.9
Acinetobacter_baumannii	4biw	model_0124	atp	1	-7.7	0
Acinetobacter_baumannii	4biw	model_0124	atp	2	-7.1	3
Acinetobacter_baumannii	4biw	model_0124	atp	3	-7	3.8
Acinetobacter_baumannii	4biw	model_0124	atp	4	-6.6	8
Acinetobacter_baumannii	4biw	model_0124	atp	5	-6.5	2.7
Acinetobacter_baumannii	4biw	model_0124	atp	6	-6.5	3.9
Acinetobacter_baumannii	4biw	model_0124	atp	7	-6.4	2.5
Acinetobacter_baumannii	4biw	model_0124	atp	8	-6.3	4
Acinetobacter_baumannii	4biw	model_0124	atp	9	-6.2	2.7
Acinetobacter_baumannii	4biw	model_0124	atp	10	-6	3
Acinetobacter_baumannii	4biw	model_0124	atp	11	-5.8	3.5
Acinetobacter_baumannii	4biw	model_0124	atp	12	-5.3	7.3
Acinetobacter_baumannii	4biw	model_0124	atp	13	-5	4.7
Acinetobacter_baumannii	4biw	model_0125	atp	1	-7.1	0
Acinetobacter_baumannii	4biw	model_0125	atp	2	-6.7	2.4
Acinetobacter_baumannii	4biw	model_0125	atp	3	-6.4	2.2
Acinetobacter_baumannii	4biw	model_0125	atp	4	-6.1	2.6
Acinetobacter_baumannii	4biw	model_0125	atp	5	-6	2.6
Acinetobacter_baumannii	4biw	model_0125	atp	6	-5.6	4.6
Acinetobacter_baumannii	4biw	model_0125	atp	7	-5.1	8.3
Acinetobacter_baumannii	4biw	model_0125	atp	8	-5.1	2.6
Acinetobacter_baumannii	4biw	model_0125	atp	9	-4.5	4.2
Acinetobacter_baumannii	4biw	model_0125	atp	10	-3.7	5.1
Acinetobacter_baumannii	4biw	model_0125	atp	11	-3.4	4.2
Acinetobacter_baumannii	4biw	model_0126	atp	1	-7.7	0
Acinetobacter_baumannii	4biw	model_0126	atp	2	-6.9	3.3
Acinetobacter_baumannii	4biw	model_0126	atp	3	-6.6	2.2
Acinetobacter_baumannii	4biw	model_0126	atp	4	-6.2	2.1
Acinetobacter_baumannii	4biw	model_0126	atp	5	-5.8	3.5
Acinetobacter_baumannii	4biw	model_0126	atp	6	-5.8	3.5
Acinetobacter_baumannii	4biw	model_0126	atp	7	-5.5	3.1
Acinetobacter_baumannii	4biw	model_0126	atp	8	-4.9	2
Acinetobacter_baumannii	4biw	model_0126	atp	9	-4.4	2.9
Acinetobacter_baumannii	4biw	model_0126	atp	10	-4.2	2.6
Acinetobacter_baumannii	4biw	model_0126	atp	11	-4.1	7.2
Acinetobacter_baumannii	4biw	model_0127	atp	1	-9	0
Acinetobacter_baumannii	4biw	model_0127	atp	2	-8.3	2.1
Acinetobacter_baumannii	4biw	model_0127	atp	3	-8.2	2.2
Acinetobacter_baumannii	4biw	model_0127	atp	4	-7.8	3.2
Acinetobacter_baumannii	4biw	model_0127	atp	5	-7.4	9
Acinetobacter_baumannii	4biw	model_0127	atp	6	-6.8	3.3
Acinetobacter_baumannii	4biw	model_0127	atp	7	-5.8	8.4
Acinetobacter_baumannii	4biw	model_0127	atp	8	-5.5	3.1
Acinetobacter_baumannii	4biw	model_0127	atp	9	-5.5	4.2
Acinetobacter_baumannii	4biw	model_0127	atp	10	-3.9	8.9
Acinetobacter_baumannii	4biw	model_0128	atp	1	-6.6	0
Acinetobacter_baumannii	4biw	model_0128	atp	2	-5.8	2.7
Acinetobacter_baumannii	4biw	model_0128	atp	3	-5.8	2.2
Acinetobacter_baumannii	4biw	model_0128	atp	4	-5	8.1
Acinetobacter_baumannii	4biw	model_0128	atp	5	-4.4	4.1
Acinetobacter_baumannii	4biw	model_0128	atp	6	-4.4	7.1
Acinetobacter_baumannii	4biw	model_0128	atp	7	-4.4	6.2
Acinetobacter_baumannii	4biw	model_0128	atp	8	-4.2	6.6
Acinetobacter_baumannii	4biw	model_0128	atp	9	-4.2	7.6
Acinetobacter_baumannii	4biw	model_0128	atp	10	-4.2	6.7
Acinetobacter_baumannii	4biw	model_0128	atp	11	-4	6.6
Acinetobacter_baumannii	4biw	model_0128	atp	12	-3.6	5.1
Acinetobacter_baumannii	4biw	model_0128	atp	13	-3	5.5
Acinetobacter_baumannii	4biw	model_0129	atp	1	-6.6	0
Acinetobacter_baumannii	4biw	model_0129	atp	2	-6	3.4
Acinetobacter_baumannii	4biw	model_0129	atp	3	-5.8	8.1
Acinetobacter_baumannii	4biw	model_0129	atp	4	-5.7	3.7
Acinetobacter_baumannii	4biw	model_0129	atp	5	-5.5	2.3
Acinetobacter_baumannii	4biw	model_0129	atp	6	-5.1	8.7
Acinetobacter_baumannii	4biw	model_0129	atp	7	-5.1	7.8
Acinetobacter_baumannii	4biw	model_0129	atp	8	-5	9.2
Acinetobacter_baumannii	4biw	model_0129	atp	9	-4.5	4.6
Acinetobacter_baumannii	4biw	model_0129	atp	10	-3.3	5
Acinetobacter_baumannii	4biw	model_0130	atp	1	-7.1	0
Acinetobacter_baumannii	4biw	model_0130	atp	2	-6.8	2.5
Acinetobacter_baumannii	4biw	model_0130	atp	3	-6.2	2.8
Acinetobacter_baumannii	4biw	model_0130	atp	4	-5.5	2.4
Acinetobacter_baumannii	4biw	model_0130	atp	5	-5.4	2.9
Acinetobacter_baumannii	4biw	model_0130	atp	6	-5.2	3
Acinetobacter_baumannii	4biw	model_0130	atp	7	-5.2	2.5
Acinetobacter_baumannii	4biw	model_0130	atp	8	-4.8	3.6
Acinetobacter_baumannii	4biw	model_0130	atp	9	-4.7	5
Acinetobacter_baumannii	4biw	model_0130	atp	10	-4.4	6.1
Acinetobacter_baumannii	4biw	model_0130	atp	11	-3.6	6.4
Acinetobacter_baumannii	4biw	model_0130	atp	12	-1.9	3.3
Acinetobacter_baumannii	4biw	model_0131	atp	1	-7.1	0
Acinetobacter_baumannii	4biw	model_0131	atp	2	-6.7	4.3
Acinetobacter_baumannii	4biw	model_0131	atp	3	-6.4	2.5
Acinetobacter_baumannii	4biw	model_0131	atp	4	-6.1	3.3
Acinetobacter_baumannii	4biw	model_0131	atp	5	-5.8	4.5
Acinetobacter_baumannii	4biw	model_0131	atp	6	-5.6	2.2
Acinetobacter_baumannii	4biw	model_0131	atp	7	-4.9	9.1
Acinetobacter_baumannii	4biw	model_0131	atp	8	-4.8	2.3
Acinetobacter_baumannii	4biw	model_0131	atp	9	-4.8	3
Acinetobacter_baumannii	4biw	model_0131	atp	10	-4.2	7.4
Acinetobacter_baumannii	4biw	model_0131	atp	11	-4.2	7.5
Acinetobacter_baumannii	4biw	model_0131	atp	12	-4.1	7.4
Acinetobacter_baumannii	4biw	model_0131	atp	13	-4	6.7
Acinetobacter_baumannii	4biw	model_0131	atp	14	-3.3	8.6
Acinetobacter_baumannii	4biw	model_0132	atp	1	-8	0
Acinetobacter_baumannii	4biw	model_0132	atp	2	-7	2.1
Acinetobacter_baumannii	4biw	model_0132	atp	3	-6.9	2.3
Acinetobacter_baumannii	4biw	model_0132	atp	4	-6.1	2.9
Acinetobacter_baumannii	4biw	model_0132	atp	5	-5.4	2.7
Acinetobacter_baumannii	4biw	model_0132	atp	6	-5.1	2.6
Acinetobacter_baumannii	4biw	model_0132	atp	7	-4.8	4.2
Acinetobacter_baumannii	4biw	model_0132	atp	8	-4.4	7.4
Acinetobacter_baumannii	4biw	model_0132	atp	9	-4.3	3.2
Acinetobacter_baumannii	4biw	model_0132	atp	10	-4.2	4.7
Acinetobacter_baumannii	4biw	model_0132	atp	11	-3.3	4.5
Acinetobacter_baumannii	4biw	model_0133	atp	1	-9.2	0
Acinetobacter_baumannii	4biw	model_0133	atp	2	-7.2	2
Acinetobacter_baumannii	4biw	model_0133	atp	3	-7	2.8
Acinetobacter_baumannii	4biw	model_0133	atp	4	-6.9	7.2
Acinetobacter_baumannii	4biw	model_0133	atp	5	-6	8.6
Acinetobacter_baumannii	4biw	model_0133	atp	6	-5.9	2.7
Acinetobacter_baumannii	4biw	model_0133	atp	7	-5.4	7.8
Acinetobacter_baumannii	4biw	model_0133	atp	8	-5.3	4.1
Acinetobacter_baumannii	4biw	model_0133	atp	9	-4.8	8.5
Acinetobacter_baumannii	4biw	model_0133	atp	10	-4.2	6.9
Acinetobacter_baumannii	4biw	model_0134	atp	1	-7.9	0
Acinetobacter_baumannii	4biw	model_0134	atp	2	-6.8	2.6
Acinetobacter_baumannii	4biw	model_0134	atp	3	-6.3	3.9
Acinetobacter_baumannii	4biw	model_0134	atp	4	-6.2	2.3
Acinetobacter_baumannii	4biw	model_0134	atp	5	-6.1	4.1
Acinetobacter_baumannii	4biw	model_0134	atp	6	-5.9	4.2
Acinetobacter_baumannii	4biw	model_0134	atp	7	-5.7	3.3
Acinetobacter_baumannii	4biw	model_0134	atp	8	-5.3	8.1
Acinetobacter_baumannii	4biw	model_0134	atp	9	-5	5.1
Acinetobacter_baumannii	4biw	model_0134	atp	10	-4.9	7.3
Acinetobacter_baumannii	4biw	model_0134	atp	11	-4.6	6.5
Acinetobacter_baumannii	4biw	model_0134	atp	12	-3.9	5.9
Acinetobacter_baumannii	4biw	model_0134	atp	13	-3.6	6.7
Acinetobacter_baumannii	4biw	model_0135	atp	1	-7.2	0
Acinetobacter_baumannii	4biw	model_0135	atp	2	-6.6	7.7
Acinetobacter_baumannii	4biw	model_0135	atp	3	-6.4	6.7
Acinetobacter_baumannii	4biw	model_0135	atp	4	-6.4	3.1
Acinetobacter_baumannii	4biw	model_0135	atp	5	-6	7
Acinetobacter_baumannii	4biw	model_0135	atp	6	-6	6.7
Acinetobacter_baumannii	4biw	model_0135	atp	7	-5.9	4
Acinetobacter_baumannii	4biw	model_0135	atp	8	-5.8	7.4
Acinetobacter_baumannii	4biw	model_0135	atp	9	-5.7	6.5
Acinetobacter_baumannii	4biw	model_0135	atp	10	-5.7	6.9
Acinetobacter_baumannii	4biw	model_0135	atp	11	-5.7	7.7
Acinetobacter_baumannii	4biw	model_0135	atp	12	-5.5	3.3
Acinetobacter_baumannii	4biw	model_0135	atp	13	-5.5	7.3
Acinetobacter_baumannii	4biw	model_0135	atp	14	-4.9	7.7
Acinetobacter_baumannii	4biw	model_0135	atp	15	-4.5	2.5
Acinetobacter_baumannii	4biw	model_0135	atp	16	-4.3	6.3
Acinetobacter_baumannii	4biw	model_0135	atp	17	-4	8.1
Acinetobacter_baumannii	4biw	model_0135	atp	18	-3.6	6.2
Acinetobacter_baumannii	4biw	model_0136	atp	1	-7.6	0
Acinetobacter_baumannii	4biw	model_0136	atp	2	-7.5	3.2
Acinetobacter_baumannii	4biw	model_0136	atp	3	-7.2	2.5
Acinetobacter_baumannii	4biw	model_0136	atp	4	-6.8	2.3
Acinetobacter_baumannii	4biw	model_0136	atp	5	-6.7	2.4
Acinetobacter_baumannii	4biw	model_0136	atp	6	-6.3	3
Acinetobacter_baumannii	4biw	model_0136	atp	7	-6.1	3.9
Acinetobacter_baumannii	4biw	model_0136	atp	8	-4.7	3.8
Acinetobacter_baumannii	4biw	model_0136	atp	9	-4.1	3.9
Acinetobacter_baumannii	4biw	model_0136	atp	10	-3.8	6.9
Acinetobacter_baumannii	4biw	model_0136	atp	11	-3.7	4.3
Acinetobacter_baumannii	4biw	model_0137	atp	1	-7.6	0
Acinetobacter_baumannii	4biw	model_0137	atp	2	-6.9	2.1
Acinetobacter_baumannii	4biw	model_0137	atp	3	-6.1	2
Acinetobacter_baumannii	4biw	model_0137	atp	4	-5.4	4.3
Acinetobacter_baumannii	4biw	model_0137	atp	5	-4.6	8.1
Acinetobacter_baumannii	4biw	model_0137	atp	6	-4.3	6.5
Acinetobacter_baumannii	4biw	model_0137	atp	7	-3.3	7.6
Acinetobacter_baumannii	4biw	model_0138	atp	1	-8	0
Acinetobacter_baumannii	4biw	model_0138	atp	2	-7.2	2.1
Acinetobacter_baumannii	4biw	model_0138	atp	3	-6.8	3.4
Acinetobacter_baumannii	4biw	model_0138	atp	4	-6.6	2.8
Acinetobacter_baumannii	4biw	model_0138	atp	5	-6.5	3
Acinetobacter_baumannii	4biw	model_0138	atp	6	-6.5	2.3
Acinetobacter_baumannii	4biw	model_0138	atp	7	-5.9	2.1
Acinetobacter_baumannii	4biw	model_0138	atp	8	-5.5	2.2
Acinetobacter_baumannii	4biw	model_0138	atp	9	-5.2	3.5
Acinetobacter_baumannii	4biw	model_0138	atp	10	-5.1	4.3
Acinetobacter_baumannii	4biw	model_0139	atp	1	-7.4	0
Acinetobacter_baumannii	4biw	model_0139	atp	2	-7.3	2.8
Acinetobacter_baumannii	4biw	model_0139	atp	3	-6.9	3.5
Acinetobacter_baumannii	4biw	model_0139	atp	4	-6.9	2.3
Acinetobacter_baumannii	4biw	model_0139	atp	5	-6.5	2.1
Acinetobacter_baumannii	4biw	model_0139	atp	6	-6	3.9
Acinetobacter_baumannii	4biw	model_0139	atp	7	-5.3	7.5
Acinetobacter_baumannii	4biw	model_0139	atp	8	-5.3	4.6
Acinetobacter_baumannii	4biw	model_0140	atp	1	-7.3	0
Acinetobacter_baumannii	4biw	model_0140	atp	2	-7.2	2.3
Acinetobacter_baumannii	4biw	model_0140	atp	3	-6.4	3.3
Acinetobacter_baumannii	4biw	model_0140	atp	4	-6.4	2.3
Acinetobacter_baumannii	4biw	model_0140	atp	5	-6.2	2.8
Acinetobacter_baumannii	4biw	model_0140	atp	6	-5.9	2.4
Acinetobacter_baumannii	4biw	model_0140	atp	7	-5.6	4.3
Acinetobacter_baumannii	4biw	model_0140	atp	8	-4.9	4.1
Acinetobacter_baumannii	4biw	model_0140	atp	9	-4.3	3.1
Acinetobacter_baumannii	4biw	model_0140	atp	10	-4	7.2
Acinetobacter_baumannii	4biw	model_0141	atp	1	-8.5	0
Acinetobacter_baumannii	4biw	model_0141	atp	2	-8	2.5
Acinetobacter_baumannii	4biw	model_0141	atp	3	-7.6	2.7
Acinetobacter_baumannii	4biw	model_0141	atp	4	-7.4	2.1
Acinetobacter_baumannii	4biw	model_0141	atp	5	-7.2	3.5
Acinetobacter_baumannii	4biw	model_0141	atp	6	-7	3.8
Acinetobacter_baumannii	4biw	model_0141	atp	7	-6.9	2.3
Acinetobacter_baumannii	4biw	model_0141	atp	8	-6.8	2.6
Acinetobacter_baumannii	4biw	model_0141	atp	9	-6.8	2.4
Acinetobacter_baumannii	4biw	model_0141	atp	10	-6.7	3.4
Acinetobacter_baumannii	4biw	model_0141	atp	11	-6.1	3.5
Acinetobacter_baumannii	4biw	model_0142	atp	1	-7.3	0
Acinetobacter_baumannii	4biw	model_0142	atp	2	-6.8	2.5
Acinetobacter_baumannii	4biw	model_0142	atp	3	-6.6	3.2
Acinetobacter_baumannii	4biw	model_0142	atp	4	-6.5	2.5
Acinetobacter_baumannii	4biw	model_0142	atp	5	-6.4	2.9
Acinetobacter_baumannii	4biw	model_0142	atp	6	-6.3	3.6
Acinetobacter_baumannii	4biw	model_0142	atp	7	-6	3.4
Acinetobacter_baumannii	4biw	model_0142	atp	8	-5.9	2.6
Acinetobacter_baumannii	4biw	model_0142	atp	9	-5.5	3.1
Acinetobacter_baumannii	4biw	model_0142	atp	10	-4.8	7.9
Acinetobacter_baumannii	4biw	model_0142	atp	11	-3.7	4.1
Acinetobacter_baumannii	4biw	model_0143	atp	1	-8.1	0
Acinetobacter_baumannii	4biw	model_0143	atp	2	-7.1	2.3
Acinetobacter_baumannii	4biw	model_0143	atp	3	-6.8	3.3
Acinetobacter_baumannii	4biw	model_0143	atp	4	-6.6	3.1
Acinetobacter_baumannii	4biw	model_0143	atp	5	-6.2	2.8
Acinetobacter_baumannii	4biw	model_0143	atp	6	-5.8	4.3
Acinetobacter_baumannii	4biw	model_0143	atp	7	-5.5	5.1
Acinetobacter_baumannii	4biw	model_0143	atp	8	-4.8	7.7
Acinetobacter_baumannii	4biw	model_0143	atp	9	-4.6	3.8
Acinetobacter_baumannii	4biw	model_0143	atp	10	-4.6	7.5
Acinetobacter_baumannii	4biw	model_0144	atp	1	-7.3	0
Acinetobacter_baumannii	4biw	model_0144	atp	2	-7.3	2.4
Acinetobacter_baumannii	4biw	model_0144	atp	3	-7	2.1
Acinetobacter_baumannii	4biw	model_0144	atp	4	-6.7	2.1
Acinetobacter_baumannii	4biw	model_0144	atp	5	-6.6	2.9
Acinetobacter_baumannii	4biw	model_0144	atp	6	-6.4	2.3
Acinetobacter_baumannii	4biw	model_0144	atp	7	-6.4	2.8
Acinetobacter_baumannii	4biw	model_0144	atp	8	-5.7	2.9
Acinetobacter_baumannii	4biw	model_0144	atp	9	-5.5	2.2
Acinetobacter_baumannii	4biw	model_0144	atp	10	-5.3	2.2
Acinetobacter_baumannii	4biw	model_0144	atp	11	-5	6.8
Acinetobacter_baumannii	4biw	model_0144	atp	12	-5	5.6
Acinetobacter_baumannii	4biw	model_0144	atp	13	-4.2	3.1
Acinetobacter_baumannii	4biw	model_0145	atp	1	-6.5	0
Acinetobacter_baumannii	4biw	model_0145	atp	2	-5.2	4.4
Acinetobacter_baumannii	4biw	model_0145	atp	3	-4.8	5.4
Acinetobacter_baumannii	4biw	model_0145	atp	4	-4.5	3.4
Acinetobacter_baumannii	4biw	model_0145	atp	5	-4.2	7.8
Acinetobacter_baumannii	4biw	model_0145	atp	6	-4.1	2.2
Acinetobacter_baumannii	4biw	model_0145	atp	7	-4	6.5
Acinetobacter_baumannii	4biw	model_0145	atp	8	-3.9	6.6
Acinetobacter_baumannii	4biw	model_0145	atp	9	-3.8	8
Acinetobacter_baumannii	4biw	model_0145	atp	10	-3.3	8.9
Acinetobacter_baumannii	4biw	model_0145	atp	11	-3.1	3.1
Acinetobacter_baumannii	4biw	model_0145	atp	12	-3.1	5.8
Acinetobacter_baumannii	4biw	model_0145	atp	13	-3	4.3
Acinetobacter_baumannii	4biw	model_0145	atp	14	-2.9	5.2
Acinetobacter_baumannii	4biw	model_0145	atp	15	-2.7	6.5
Acinetobacter_baumannii	4biw	model_0145	atp	16	-2.7	7.1
Acinetobacter_baumannii	4biw	model_0145	atp	17	-2.6	2.4
Acinetobacter_baumannii	4biw	model_0145	atp	18	-2.5	3.3
Acinetobacter_baumannii	4biw	model_0145	atp	19	-2.3	8.6
Acinetobacter_baumannii	4biw	model_0145	atp	20	-2	5.8
Acinetobacter_baumannii	4biw	model_0145	atp	21	-1.9	7.6
Acinetobacter_baumannii	4biw	model_0145	atp	22	-1.9	4.1
Acinetobacter_baumannii	4biw	model_0145	atp	23	-1.1	6.9
Acinetobacter_baumannii	4biw	model_0146	atp	1	-7.8	0
Acinetobacter_baumannii	4biw	model_0146	atp	2	-7.2	2
Acinetobacter_baumannii	4biw	model_0146	atp	3	-7.2	3.1
Acinetobacter_baumannii	4biw	model_0146	atp	4	-6.7	3.4
Acinetobacter_baumannii	4biw	model_0146	atp	5	-6.6	3.4
Acinetobacter_baumannii	4biw	model_0146	atp	6	-6.5	4.9
Acinetobacter_baumannii	4biw	model_0146	atp	7	-5.3	6.2
Acinetobacter_baumannii	4biw	model_0146	atp	8	-5	6.3
Acinetobacter_baumannii	4biw	model_0147	atp	1	-8.2	0
Acinetobacter_baumannii	4biw	model_0147	atp	2	-7.4	3
Acinetobacter_baumannii	4biw	model_0147	atp	3	-7.2	2.1
Acinetobacter_baumannii	4biw	model_0147	atp	4	-6.9	2.3
Acinetobacter_baumannii	4biw	model_0147	atp	5	-6.8	3.8
Acinetobacter_baumannii	4biw	model_0147	atp	6	-5.8	2.6
Acinetobacter_baumannii	4biw	model_0147	atp	7	-5.1	3.6
Acinetobacter_baumannii	4biw	model_0147	atp	8	-4.9	8.6
Acinetobacter_baumannii	4biw	model_0147	atp	9	-4.8	6.3
Acinetobacter_baumannii	4biw	model_0148	atp	1	-9.3	0
Acinetobacter_baumannii	4biw	model_0148	atp	2	-7.9	2.8
Acinetobacter_baumannii	4biw	model_0148	atp	3	-7.4	2.4
Acinetobacter_baumannii	4biw	model_0148	atp	4	-7	6.8
Acinetobacter_baumannii	4biw	model_0148	atp	5	-5.6	7.9
Acinetobacter_baumannii	4biw	model_0148	atp	6	-5.3	4
Acinetobacter_baumannii	4biw	model_0148	atp	7	-4.9	3.4
Acinetobacter_baumannii	4biw	model_0148	atp	8	-4.7	5.5
Acinetobacter_baumannii	4biw	model_0148	atp	9	-4.6	6.1
Acinetobacter_baumannii	4biw	model_0148	atp	10	-4.3	5.4
Acinetobacter_baumannii	4biw	model_0148	atp	11	-4.3	7.3
Acinetobacter_baumannii	4biw	model_0149	atp	1	-8.7	0
Acinetobacter_baumannii	4biw	model_0149	atp	2	-7.1	2.1
Acinetobacter_baumannii	4biw	model_0149	atp	3	-6.9	2.5
Acinetobacter_baumannii	4biw	model_0149	atp	4	-6.8	2
Acinetobacter_baumannii	4biw	model_0149	atp	5	-6.1	4.8
Acinetobacter_baumannii	4biw	model_0149	atp	6	-5.9	5.9
Acinetobacter_baumannii	4biw	model_0149	atp	7	-5.6	3.3
Acinetobacter_baumannii	4biw	model_0149	atp	8	-5.5	8.3
Acinetobacter_baumannii	4biw	model_0149	atp	9	-5.3	7
Acinetobacter_baumannii	4biw	model_0149	atp	10	-4.9	8.4
Acinetobacter_baumannii	4biw	model_0149	atp	11	-4.2	8.6
Acinetobacter_baumannii	4biw	model_0149	atp	12	-3.8	8.4
Acinetobacter_baumannii	4biw	model_0150	atp	1	-8.2	0
Acinetobacter_baumannii	4biw	model_0150	atp	2	-7.6	2.5
Acinetobacter_baumannii	4biw	model_0150	atp	3	-7.3	4
Acinetobacter_baumannii	4biw	model_0150	atp	4	-6.4	3.4
Acinetobacter_baumannii	4biw	model_0150	atp	5	-6.1	3.9
Acinetobacter_baumannii	4biw	model_0150	atp	6	-5.9	3.3
Acinetobacter_baumannii	4biw	model_0150	atp	7	-5.1	4.7
Acinetobacter_baumannii	4biw	model_0150	atp	8	-4.8	2.4
Acinetobacter_baumannii	4biw	model_0150	atp	9	-4.1	4.9
Acinetobacter_baumannii	4biw	model_0150	atp	10	-3.9	8.1
Acinetobacter_baumannii	4biw	model_0151	atp	1	-8.4	0
Acinetobacter_baumannii	4biw	model_0151	atp	2	-7.9	2.2
Acinetobacter_baumannii	4biw	model_0151	atp	3	-7.3	2.1
Acinetobacter_baumannii	4biw	model_0151	atp	4	-6.8	3.2
Acinetobacter_baumannii	4biw	model_0151	atp	5	-6.7	3.2
Acinetobacter_baumannii	4biw	model_0151	atp	6	-6.2	2.6
Acinetobacter_baumannii	4biw	model_0151	atp	7	-5.8	2.7
Acinetobacter_baumannii	4biw	model_0151	atp	8	-5.6	4.9
Acinetobacter_baumannii	4biw	model_0151	atp	9	-4.2	7
Acinetobacter_baumannii	4biw	model_0151	atp	10	-3.5	4.9
Acinetobacter_baumannii	4biw	model_0152	atp	1	-8.1	0
Acinetobacter_baumannii	4biw	model_0152	atp	2	-8	2.2
Acinetobacter_baumannii	4biw	model_0152	atp	3	-6.7	2.1
Acinetobacter_baumannii	4biw	model_0152	atp	4	-6.7	2.8
Acinetobacter_baumannii	4biw	model_0152	atp	5	-5.9	2.4
Acinetobacter_baumannii	4biw	model_0152	atp	6	-5.6	5
Acinetobacter_baumannii	4biw	model_0152	atp	7	-5.3	4.8
Acinetobacter_baumannii	4biw	model_0152	atp	8	-4.7	2.7
Acinetobacter_baumannii	4biw	model_0153	atp	1	-7.9	0
Acinetobacter_baumannii	4biw	model_0153	atp	2	-7	2.4
Acinetobacter_baumannii	4biw	model_0153	atp	3	-6.7	3
Acinetobacter_baumannii	4biw	model_0153	atp	4	-6.6	3.4
Acinetobacter_baumannii	4biw	model_0153	atp	5	-6.1	4.8
Acinetobacter_baumannii	4biw	model_0153	atp	6	-5.9	3.6
Acinetobacter_baumannii	4biw	model_0153	atp	7	-5.3	4.5
Acinetobacter_baumannii	4biw	model_0153	atp	8	-5.2	4.1
Acinetobacter_baumannii	4biw	model_0153	atp	9	-5	5.5
Acinetobacter_baumannii	4biw	model_0153	atp	10	-4.7	4.2
Acinetobacter_baumannii	4biw	model_0153	atp	11	-4.6	3.1
Acinetobacter_baumannii	4biw	model_0153	atp	12	-4.2	5.8
Acinetobacter_baumannii	4biw	model_0153	atp	13	-2.8	3.8
Acinetobacter_baumannii	4biw	model_0154	atp	1	-8.8	0
Acinetobacter_baumannii	4biw	model_0154	atp	2	-8.6	4.4
Acinetobacter_baumannii	4biw	model_0154	atp	3	-8.1	2.3
Acinetobacter_baumannii	4biw	model_0154	atp	4	-7.9	2.6
Acinetobacter_baumannii	4biw	model_0154	atp	5	-7.8	2.2
Acinetobacter_baumannii	4biw	model_0154	atp	6	-4.6	8
Acinetobacter_baumannii	4biw	model_0155	atp	1	-7.9	0
Acinetobacter_baumannii	4biw	model_0155	atp	2	-7.8	2.4
Acinetobacter_baumannii	4biw	model_0155	atp	3	-7.6	2.3
Acinetobacter_baumannii	4biw	model_0155	atp	4	-7.1	2.7
Acinetobacter_baumannii	4biw	model_0155	atp	5	-6.3	2.8
Acinetobacter_baumannii	4biw	model_0155	atp	6	-6.3	2.7
Acinetobacter_baumannii	4biw	model_0155	atp	7	-5.6	4.1
Acinetobacter_baumannii	4biw	model_0155	atp	8	-5.3	3.5
Acinetobacter_baumannii	4biw	model_0155	atp	9	-5	5.9
Acinetobacter_baumannii	4biw	model_0155	atp	10	-5	6.1
Acinetobacter_baumannii	4biw	model_0155	atp	11	-4.7	5.1
Acinetobacter_baumannii	4biw	model_0155	atp	12	-4.5	5.9
Acinetobacter_baumannii	4biw	model_0155	atp	13	-4.1	5.3
Acinetobacter_baumannii	4biw	model_0155	atp	14	-4	3.5
Acinetobacter_baumannii	4biw	model_0156	atp	1	-7.8	0
Acinetobacter_baumannii	4biw	model_0156	atp	2	-7.6	2.1
Acinetobacter_baumannii	4biw	model_0156	atp	3	-7.4	2.8
Acinetobacter_baumannii	4biw	model_0156	atp	4	-7.2	2.7
Acinetobacter_baumannii	4biw	model_0156	atp	5	-7.1	2
Acinetobacter_baumannii	4biw	model_0156	atp	6	-6.9	2.1
Acinetobacter_baumannii	4biw	model_0156	atp	7	-6.6	3
Acinetobacter_baumannii	4biw	model_0156	atp	8	-5.5	5.2
Acinetobacter_baumannii	4biw	model_0157	atp	1	-7.4	0
Acinetobacter_baumannii	4biw	model_0157	atp	2	-6.7	7
Acinetobacter_baumannii	4biw	model_0157	atp	3	-6.7	3.8
Acinetobacter_baumannii	4biw	model_0157	atp	4	-6.6	8.1
Acinetobacter_baumannii	4biw	model_0157	atp	5	-6.5	7.5
Acinetobacter_baumannii	4biw	model_0157	atp	6	-6.1	3
Acinetobacter_baumannii	4biw	model_0157	atp	7	-5.8	7.9
Acinetobacter_baumannii	4biw	model_0157	atp	8	-5.6	2.4
Acinetobacter_baumannii	4biw	model_0157	atp	9	-5.5	7.8
Acinetobacter_baumannii	4biw	model_0157	atp	10	-5.3	7
Acinetobacter_baumannii	4biw	model_0157	atp	11	-5.3	4.2
Acinetobacter_baumannii	4biw	model_0157	atp	12	-5.1	4
Acinetobacter_baumannii	4biw	model_0157	atp	13	-4.6	2.3
Acinetobacter_baumannii	4biw	model_0157	atp	14	-4.6	7.7
Acinetobacter_baumannii	4biw	model_0157	atp	15	-4	4.2
Acinetobacter_baumannii	4biw	model_0158	atp	1	-7.1	0
Acinetobacter_baumannii	4biw	model_0158	atp	2	-6.8	2.2
Acinetobacter_baumannii	4biw	model_0158	atp	3	-6.5	2
Acinetobacter_baumannii	4biw	model_0158	atp	4	-6.2	4.5
Acinetobacter_baumannii	4biw	model_0158	atp	5	-6.1	4.1
Acinetobacter_baumannii	4biw	model_0158	atp	6	-5.7	3.1
Acinetobacter_baumannii	4biw	model_0158	atp	7	-5.6	8.1
Acinetobacter_baumannii	4biw	model_0158	atp	8	-5.5	4.6
Acinetobacter_baumannii	4biw	model_0158	atp	9	-5.4	7.7
Acinetobacter_baumannii	4biw	model_0158	atp	10	-5	2
Acinetobacter_baumannii	4biw	model_0158	atp	11	-4.4	7.8
Acinetobacter_baumannii	4biw	model_0158	atp	12	-4.1	6.7
Acinetobacter_baumannii	4biw	model_0158	atp	13	-3.1	6.4
Acinetobacter_baumannii	4biw	model_0159	atp	1	-7.7	0
Acinetobacter_baumannii	4biw	model_0159	atp	2	-7.1	2.6
Acinetobacter_baumannii	4biw	model_0159	atp	3	-6.7	2.5
Acinetobacter_baumannii	4biw	model_0159	atp	4	-6.7	2.1
Acinetobacter_baumannii	4biw	model_0159	atp	5	-6.3	3
Acinetobacter_baumannii	4biw	model_0159	atp	6	-6.2	4
Acinetobacter_baumannii	4biw	model_0159	atp	7	-5.8	2.9
Acinetobacter_baumannii	4biw	model_0159	atp	8	-5.6	2.7
Acinetobacter_baumannii	4biw	model_0159	atp	9	-5.2	4.5
Acinetobacter_baumannii	4biw	model_0159	atp	10	-4.5	4.5
Acinetobacter_baumannii	4biw	model_0159	atp	11	-4.3	4.4
Acinetobacter_baumannii	4biw	model_0160	atp	1	-7.4	0
Acinetobacter_baumannii	4biw	model_0160	atp	2	-7.4	2.3
Acinetobacter_baumannii	4biw	model_0160	atp	3	-7	3.3
Acinetobacter_baumannii	4biw	model_0160	atp	4	-6.8	3.2
Acinetobacter_baumannii	4biw	model_0160	atp	5	-6.7	3.8
Acinetobacter_baumannii	4biw	model_0160	atp	6	-6.6	4.3
Acinetobacter_baumannii	4biw	model_0160	atp	7	-6.3	4.6
Acinetobacter_baumannii	4biw	model_0160	atp	8	-4.5	4.1
Acinetobacter_baumannii	4biw	model_0161	atp	1	-9.1	0
Acinetobacter_baumannii	4biw	model_0161	atp	2	-8.2	3.1
Acinetobacter_baumannii	4biw	model_0161	atp	3	-7.6	2.4
Acinetobacter_baumannii	4biw	model_0161	atp	4	-7.6	2.1
Acinetobacter_baumannii	4biw	model_0161	atp	5	-7.3	3.7
Acinetobacter_baumannii	4biw	model_0161	atp	6	-6.5	4.3
Acinetobacter_baumannii	4biw	model_0161	atp	7	-6.2	5
Acinetobacter_baumannii	4biw	model_0161	atp	8	-4.4	7.5
Acinetobacter_baumannii	4biw	model_0162	atp	1	-7.2	0
Acinetobacter_baumannii	4biw	model_0162	atp	2	-7	2.2
Acinetobacter_baumannii	4biw	model_0162	atp	3	-6.7	2.9
Acinetobacter_baumannii	4biw	model_0162	atp	4	-6.7	2.4
Acinetobacter_baumannii	4biw	model_0162	atp	5	-6.5	3.4
Acinetobacter_baumannii	4biw	model_0162	atp	6	-5	2.7
Acinetobacter_baumannii	4biw	model_0162	atp	7	-4.7	6.9
Acinetobacter_baumannii	4biw	model_0162	atp	8	-4.6	6.6
Acinetobacter_baumannii	4biw	model_0162	atp	9	-4	7.1
Acinetobacter_baumannii	4biw	model_0163	atp	1	-8	0
Acinetobacter_baumannii	4biw	model_0163	atp	2	-7.7	2.5
Acinetobacter_baumannii	4biw	model_0163	atp	3	-7.3	3.8
Acinetobacter_baumannii	4biw	model_0163	atp	4	-7.2	4.6
Acinetobacter_baumannii	4biw	model_0163	atp	5	-7	3.1
Acinetobacter_baumannii	4biw	model_0163	atp	6	-6.9	2.2
Acinetobacter_baumannii	4biw	model_0163	atp	7	-6.8	3.4
Acinetobacter_baumannii	4biw	model_0163	atp	8	-6.7	2.7
Acinetobacter_baumannii	4biw	model_0163	atp	9	-6.7	3.4
Acinetobacter_baumannii	4biw	model_0163	atp	10	-6.6	4.2
Acinetobacter_baumannii	4biw	model_0163	atp	11	-6.4	3.3
Acinetobacter_baumannii	4biw	model_0163	atp	12	-6.3	2.1
Acinetobacter_baumannii	4biw	model_0163	atp	13	-6.2	2.2
Acinetobacter_baumannii	4biw	model_0163	atp	14	-6	2.4
Acinetobacter_baumannii	4biw	model_0163	atp	15	-5.9	3.7
Acinetobacter_baumannii	4biw	model_0163	atp	16	-5.5	6.7
Acinetobacter_baumannii	4biw	model_0163	atp	17	-5.1	4.3
Acinetobacter_baumannii	4biw	model_0163	atp	18	-4.4	7.5
Acinetobacter_baumannii	4biw	model_0164	atp	1	-8.8	0
Acinetobacter_baumannii	4biw	model_0164	atp	2	-8.2	2.3
Acinetobacter_baumannii	4biw	model_0164	atp	3	-7.4	3.5
Acinetobacter_baumannii	4biw	model_0164	atp	4	-6.9	2.6
Acinetobacter_baumannii	4biw	model_0164	atp	5	-6.4	7.9
Acinetobacter_baumannii	4biw	model_0164	atp	6	-5.8	2.6
Acinetobacter_baumannii	4biw	model_0164	atp	7	-5.8	8.3
Acinetobacter_baumannii	4biw	model_0164	atp	8	-5.7	7.5
Acinetobacter_baumannii	4biw	model_0164	atp	9	-5.5	7.6
Acinetobacter_baumannii	4biw	model_0164	atp	10	-5.3	6.8
Acinetobacter_baumannii	4biw	model_0164	atp	11	-5.2	5.2
Acinetobacter_baumannii	4biw	model_0164	atp	12	-5.2	7.5
Acinetobacter_baumannii	4biw	model_0164	atp	13	-4.9	8
Acinetobacter_baumannii	4biw	model_0165	atp	1	-7.1	0
Acinetobacter_baumannii	4biw	model_0165	atp	2	-6.7	2.8
Acinetobacter_baumannii	4biw	model_0165	atp	3	-6.5	3.3
Acinetobacter_baumannii	4biw	model_0165	atp	4	-6.4	2.2
Acinetobacter_baumannii	4biw	model_0165	atp	5	-6.3	2.3
Acinetobacter_baumannii	4biw	model_0165	atp	6	-6	2.9
Acinetobacter_baumannii	4biw	model_0165	atp	7	-5.6	2.3
Acinetobacter_baumannii	4biw	model_0165	atp	8	-5.4	2.4
Acinetobacter_baumannii	4biw	model_0165	atp	9	-5.2	3.5
Acinetobacter_baumannii	4biw	model_0165	atp	10	-4.5	2.6
Acinetobacter_baumannii	4biw	model_0166	atp	1	-7.3	0
Acinetobacter_baumannii	4biw	model_0166	atp	2	-6.8	2.8
Acinetobacter_baumannii	4biw	model_0166	atp	3	-6.8	4.1
Acinetobacter_baumannii	4biw	model_0166	atp	4	-6	2.2
Acinetobacter_baumannii	4biw	model_0166	atp	5	-5.9	2.6
Acinetobacter_baumannii	4biw	model_0166	atp	6	-5.1	2.4
Acinetobacter_baumannii	4biw	model_0166	atp	7	-4.8	7
Acinetobacter_baumannii	4biw	model_0166	atp	8	-4.6	7.2
Acinetobacter_baumannii	4biw	model_0166	atp	9	-4.2	3.7
Acinetobacter_baumannii	4biw	model_0166	atp	10	-3.9	3.3
Acinetobacter_baumannii	4biw	model_0166	atp	11	-2.7	4.9
Acinetobacter_baumannii	4biw	model_0167	atp	1	-6.9	0
Acinetobacter_baumannii	4biw	model_0167	atp	2	-6.8	2.9
Acinetobacter_baumannii	4biw	model_0167	atp	3	-6.5	2.2
Acinetobacter_baumannii	4biw	model_0167	atp	4	-6.3	2.6
Acinetobacter_baumannii	4biw	model_0167	atp	5	-6	3.8
Acinetobacter_baumannii	4biw	model_0167	atp	6	-5.8	3.8
Acinetobacter_baumannii	4biw	model_0167	atp	7	-5.4	5.6
Acinetobacter_baumannii	4biw	model_0167	atp	8	-5.4	7.3
Acinetobacter_baumannii	4biw	model_0167	atp	9	-5.2	7.2
Acinetobacter_baumannii	4biw	model_0167	atp	10	-4.8	4.5
Acinetobacter_baumannii	4biw	model_0167	atp	11	-4.6	3.4
Acinetobacter_baumannii	4biw	model_0167	atp	12	-4.6	3.6
Acinetobacter_baumannii	4biw	model_0167	atp	13	-3.8	4.5
Acinetobacter_baumannii	4biw	model_0167	atp	14	-2.8	4.8
Acinetobacter_baumannii	4biw	model_0168	atp	1	-7	0
Acinetobacter_baumannii	4biw	model_0168	atp	2	-6.8	2.4
Acinetobacter_baumannii	4biw	model_0168	atp	3	-6.7	2.2
Acinetobacter_baumannii	4biw	model_0168	atp	4	-6.5	2.1
Acinetobacter_baumannii	4biw	model_0168	atp	5	-6.3	3.9
Acinetobacter_baumannii	4biw	model_0168	atp	6	-5.6	2.2
Acinetobacter_baumannii	4biw	model_0168	atp	7	-5.6	2.8
Acinetobacter_baumannii	4biw	model_0168	atp	8	-5.2	7.3
Acinetobacter_baumannii	4biw	model_0168	atp	9	-4.8	6.5
Acinetobacter_baumannii	4biw	model_0169	atp	1	-7.7	0
Acinetobacter_baumannii	4biw	model_0169	atp	2	-7.5	3.5
Acinetobacter_baumannii	4biw	model_0169	atp	3	-6.9	2.6
Acinetobacter_baumannii	4biw	model_0169	atp	4	-6.4	2.6
Acinetobacter_baumannii	4biw	model_0169	atp	5	-5.8	2.1
Acinetobacter_baumannii	4biw	model_0169	atp	6	-5.2	3.4
Acinetobacter_baumannii	4biw	model_0169	atp	7	-4.6	3.7
Acinetobacter_baumannii	4biw	model_0169	atp	8	-4.4	8
Acinetobacter_baumannii	4biw	model_0170	atp	1	-6.7	0
Acinetobacter_baumannii	4biw	model_0170	atp	2	-6.6	3.6
Acinetobacter_baumannii	4biw	model_0170	atp	3	-5.9	5.9
Acinetobacter_baumannii	4biw	model_0170	atp	4	-5.9	3.8
Acinetobacter_baumannii	4biw	model_0170	atp	5	-5.5	6.4
Acinetobacter_baumannii	4biw	model_0170	atp	6	-5.3	4.8
Acinetobacter_baumannii	4biw	model_0170	atp	7	-5.2	7.1
Acinetobacter_baumannii	4biw	model_0170	atp	8	-4.5	5.1
Acinetobacter_baumannii	4biw	model_0170	atp	9	-3.8	6.1
Acinetobacter_baumannii	4biw	model_0171	atp	1	-7.2	0
Acinetobacter_baumannii	4biw	model_0171	atp	2	-6.9	3.4
Acinetobacter_baumannii	4biw	model_0171	atp	3	-6.7	2.2
Acinetobacter_baumannii	4biw	model_0171	atp	4	-6.6	2.4
Acinetobacter_baumannii	4biw	model_0171	atp	5	-6.6	2.1
Acinetobacter_baumannii	4biw	model_0171	atp	6	-6.3	2.6
Acinetobacter_baumannii	4biw	model_0171	atp	7	-6.3	2.1
Acinetobacter_baumannii	4biw	model_0171	atp	8	-5.2	2.2
Acinetobacter_baumannii	4biw	model_0171	atp	9	-4.9	3
Acinetobacter_baumannii	4biw	model_0171	atp	10	-4.6	3.6
Acinetobacter_baumannii	4biw	model_0171	atp	11	-4.5	3.6
Acinetobacter_baumannii	4biw	model_0171	atp	12	-3.4	7.6
Acinetobacter_baumannii	4biw	model_0172	atp	1	-7	0
Acinetobacter_baumannii	4biw	model_0172	atp	2	-6.6	5.5
Acinetobacter_baumannii	4biw	model_0172	atp	3	-6.1	2.4
Acinetobacter_baumannii	4biw	model_0172	atp	4	-5.5	2.6
Acinetobacter_baumannii	4biw	model_0172	atp	5	-5.2	3.5
Acinetobacter_baumannii	4biw	model_0172	atp	6	-4.7	2.1
Acinetobacter_baumannii	4biw	model_0172	atp	7	-4.4	8.1
Acinetobacter_baumannii	4biw	model_0172	atp	8	-4.4	4.4
Acinetobacter_baumannii	4biw	model_0172	atp	9	-3.7	6.7
Acinetobacter_baumannii	4biw	model_0172	atp	10	-3.6	5.5
Acinetobacter_baumannii	4biw	model_0172	atp	11	-3.2	6.1
Acinetobacter_baumannii	4biw	model_0172	atp	12	-3.1	5.7
Acinetobacter_baumannii	4biw	model_0172	atp	13	-3	7.3
Acinetobacter_baumannii	4biw	model_0173	atp	1	-6.9	0
Acinetobacter_baumannii	4biw	model_0173	atp	2	-6.8	3.5
Acinetobacter_baumannii	4biw	model_0173	atp	3	-6.6	2.7
Acinetobacter_baumannii	4biw	model_0173	atp	4	-6.1	7.5
Acinetobacter_baumannii	4biw	model_0173	atp	5	-5.6	2
Acinetobacter_baumannii	4biw	model_0173	atp	6	-5.6	4.5
Acinetobacter_baumannii	4biw	model_0173	atp	7	-5.4	4.7
Acinetobacter_baumannii	4biw	model_0173	atp	8	-5.2	3.7
Acinetobacter_baumannii	4biw	model_0173	atp	9	-4.9	10.2
Acinetobacter_baumannii	4biw	model_0173	atp	10	-4.8	4.4
Acinetobacter_baumannii	4biw	model_0173	atp	11	-4.6	7.1
Acinetobacter_baumannii	4biw	model_0173	atp	12	-4.3	9.6
Acinetobacter_baumannii	4biw	model_0173	atp	13	-4	7
Acinetobacter_baumannii	4biw	model_0173	atp	14	-3.5	7.1
Acinetobacter_baumannii	4biw	model_0173	atp	15	-3.3	6.9
Acinetobacter_baumannii	4biw	model_0174	atp	1	-7.4	0
Acinetobacter_baumannii	4biw	model_0174	atp	2	-6.6	3.4
Acinetobacter_baumannii	4biw	model_0174	atp	3	-6	5.1
Acinetobacter_baumannii	4biw	model_0174	atp	4	-5.7	2.1
Acinetobacter_baumannii	4biw	model_0174	atp	5	-5.6	4.1
Acinetobacter_baumannii	4biw	model_0174	atp	6	-5.5	2.1
[truncated: 197,605 more rows]

## Sheet: (C) Free Energy of Binding
(C) MM/GBSA Binding Energy Terms for PmrB-ATP Complex across Multiple Organisms and Replicate Trajectories
Results of MM/GBSA calculations performed on two independent 200 ns MD simulation trajectories of the PmrB-ATP complex
Organisms	Energy terms	First trajectory			Second trajectory			Average
		∆G (kcal/mol)	SD (kcal/mol)	SEM (kcal/mol)	∆G (kcal/mol)	SD (kcal/mol)	SEM (kcal/mol)	∆G (kcal/mol)	SD (kcal/mol)	SEM (kcal/mol)
Acinetobacter baumannii	VDWAALS	-49.43	3.5	0.02	-49.71	5.14	0.04	-49.57	4.32	0.03
	EEL	-58.07	21.99	0.16	-117.8	16.9	0.12	-87.935	19.445	0.14
	EGB	85.2	19.55	0.14	134.41	13.67	0.1	109.805	16.61	0.12
	ESURF	-6.31	0.46	0	-6.83	0.53	0	-6.57	0.495	0
	GGAS	-107.5	22.83	0.16	-167.51	15.52	0.11	-137.505	19.175	0.135
	GSOLV	78.9	19.21	0.14	127.58	13.76	0.1	103.24	16.485	0.12
	TOTAL	-28.6	7.54	0.05	-39.93	6.91	0.05	-34.265	7.225	0.05
Escherichia coli	VDWAALS	-47.93	4.97	0.04	-52.24	4.39	0.03	-50.085	4.68	0.035
	EEL	-42.21	17.08	0.12	-62.78	19.22	0.14	-52.495	18.15	0.13
	EGB	73.27	13.07	0.09	89.82	14.43	0.1	81.545	13.75	0.095
	ESURF	-6.53	0.51	0	-7.07	0.43	0	-6.8	0.47	0
	GGAS	-90.15	18.58	0.13	-115.03	19.7	0.14	-102.59	19.14	0.135
	GSOLV	66.74	12.82	0.09	82.75	14.18	0.1	74.745	13.5	0.095
	TOTAL	-23.41	7.87	0.06	-32.28	8.35	0.06	-27.845	8.11	0.06
Klebsiella pneumoniae	VDWAALS	-49.76	4.42	0.03	-51.35	4.08	0.03	-50.555	4.25	0.03
	EEL	-81.29	14.05	0.1	-99.66	25.69	0.18	-90.475	19.87	0.14
	EGB	94.23	10.91	0.08	105.56	19.3	0.14	99.895	15.105	0.11
	ESURF	-6.86	0.3	0	-6.3	0.49	0	-6.58	0.395	0
	GGAS	-131.05	12.86	0.09	-151.01	26.11	0.18	-141.03	19.485	0.135
	GSOLV	87.37	10.89	0.08	99.26	18.99	0.13	93.315	14.94	0.105
	TOTAL	-43.67	6.27	0.04	-51.75	8.3	0.06	-47.71	7.285	0.05
Pseudomonas aeruginosa	VDWAALS	-55.96	4.09	0.03	-55.08	3.26	0.02	-55.52	3.675	0.025
	EEL	-62.47	11.84	0.08	-62.77	13.25	0.09	-62.62	12.545	0.085
	EGB	97.04	9.27	0.07	97.69	11.55	0.08	97.365	10.41	0.075
	ESURF	-6.98	0.32	0	-6.92	0.39	0	-6.95	0.355	0
	GGAS	-118.43	12.29	0.09	-117.85	13.9	0.1	-118.14	13.095	0.095
	GSOLV	90.07	9.13	0.06	90.76	11.28	0.08	90.415	10.205	0.07
	TOTAL	-28.36	6.03	0.04	-27.08	5.41	0.04	-27.72	5.72	0.04
VDWAALS, van der Waals interactions; EEL, Electrostatic interactions; EGB, Polar solvation energy; ESURF, Non-polar solvation energy (proportional to the solvent-accessible surface area);
GGAS, Gas-phase interaction energy (the sum of VDWAALS and EEL); GSOLV, Solvation free energy(the sum of EGB and ESURF); TOTAL, Total binding free energy (the sum of GGAS and GSOLV);
ΔG, Binding free energy; SD, Standard deviation; SEM, Standard Error of the Mean

## Sheet: (D) Per-residue Decomposition
(D) Per-residue energy decomposition analysis of PmrB-ATP interactions from MM/GBSA calculation.
Results of MM/GBSA calculations performed on two independent 200 ns MD simulation trajectories of the PmrB-ATP complex
Organism	Amino acid	Position	First trajectory			Second trajectory			Average
			∆G (kcal/mol)	SD (kcal/mol)	SEM (kcal/mol)	∆G (kcal/mol)	SD (kcal/mol)	SEM (kcal/mol)	∆G (kcal/mol)	SD (kcal/mol)	SEM (kcal/mol)
Acinetobacter baumannii	HIS	266	-0.65	1.24	0.01	-1.44	0.8	0.01	-1.05	1.02	0.01
	GLN	270	-0.8	0.73	0.01	-1.24	0.8	0.01	-1.02	0.77	0.01
	ASP	340	-	-	-	-2.21	1.73	0.01	-2.21	1.73	0.01
	ASN	341	-2.93	1.38	0.01	-2.21	1.44	0.01	-2.57	1.41	0.01
	LYS	344	-	-	-	-1.47	0.71	0.01	-1.47	0.71	0.01
	TYR	345	-2.55	0.99	0.01	-1.01	1.53	0.01	-1.78	1.26	0.01
	ASP	370	1.12	0.54	0	0.51	0.73	0.01	0.82	0.64	0.01
	VAL	383	-0.61	0.37	0	-0.81	0.37	0	-0.71	0.37	0
	TYR	388	-1	0.42	0	-0.67	0.8	0.01	-0.84	0.61	0.01
	ARG	389	-	-	-	-1.82	1.63	0.01	-1.82	1.63	0.01
	VAL	390	-	-	-	-0.51	0.5	0	-0.51	0.5	0
	VAL	396	-0.74	0.55	0	-0.6	0.41	0	-0.67	0.48	0
	GLY	397	-1.75	0.79	0.01	-2.26	0.76	0.01	-2.01	0.78	0.01
	SER	398	-2.08	1.36	0.01	-2.01	0.83	0.01	-2.05	1.1	0.01
	GLY	399	-1.92	1	0.01	-3.34	1.04	0.01	-2.63	1.02	0.01
	LEU	400	-1.98	0.71	0.01	-1.26	0.48	0	-1.62	0.6	0.01
	GLY	401	-1.85	0.72	0.01	-2.49	0.6	0	-2.17	0.66	0.01
	LEU	402	-1.9	1.14	0.01	-1.01	0.76	0.01	-1.46	0.95	0.01
	ATP	445	-6.11	4.35	0.03	-13.2	3.62	0.03	-9.66	3.99	0.03
Escherichia coli	ASN	264	-0.52	0.51	0	-4.84	2.37	0.02	-2.68	1.44	0.01
	ARG	267	-0.78	0.94	0.01	-1.59	1	0.01	-1.19	0.97	0.01
	TYR	268	-1.01	1.16	0.01	-3.62	1.29	0.01	-2.32	1.23	0.01
	ASP	291	0.73	0.46	0	2.18	1.14	0.01	1.46	0.8	0.01
	ILE	296	-0.68	0.51	0	-0.92	0.44	0	-0.8	0.48	0
	LEU	304	-1.2	0.5	0	-	-	-	-1.2	0.5	0
	ARG	310	-2.4	2.42	0.02	-0.66	0.91	0.01	-1.53	1.67	0.02
	MET	311	-1.15	1.21	0.01	-1.69	0.64	0	-1.42	0.93	0.01
	SER	313	-2.1	1.52	0.01	-1.32	1.52	0.01	-1.71	1.52	0.01
	ARG	314	-2.09	1.58	0.01	-1.46	1.4	0.01	-1.78	1.49	0.01
	TYR	315	-1.87	0.84	0.01	-1.26	0.97	0.01	-1.57	0.91	0.01
	GLY	316	-0.51	1.05	0.01	-	-	-	-0.51	1.05	0.01
	GLY	317	-0.56	0.92	0.01	-	-	-	-0.56	0.92	0.01
	ILE	318	-0.55	0.55	0	-0.85	1.1	0.01	-0.7	0.83	0.01
	GLY	319	-1.57	0.46	0	-1.53	0.86	0.01	-1.55	0.66	0.01
	LEU	320	-	-	-	-0.93	0.66	0	-0.93	0.66	0
	GLY	321	-	-	-	-1.51	0.61	0	-1.51	0.61	0
	LEU	322	-1.5	0.77	0.01	-2.59	0.67	0	-2.05	0.72	0.01
	ATP	364	-4.72	3.92	0.03	-7.47	4.21	0.03	-6.1	4.07	0.03
Klebsiella pneumoniae	GLN	193	-0.85	0.82	0.01	-	-	-	-0.85	0.82	0.01
	ASN	261	-1.59	0.94	0.01	-	-	-	-1.59	0.94	0.01
	GLU	264	-1.33	1.16	0.01	-1.7	1.72	0.01	-1.52	1.44	0.01
	ASN	265	-2.69	1.56	0.01	-2.14	0.9	0.01	-2.42	1.23	0.01
	ARG	268	-0.97	1.03	0.01	-1.94	0.57	0	-1.46	0.8	0.01
	TYR	269	-2.69	1.38	0.01	-3.64	0.75	0.01	-3.17	1.07	0.01
	LEU	305	-0.96	0.47	0	-1.67	0.49	0	-1.32	0.48	0
	LYS	307	-	-	-	-0.58	0.54	0	-0.58	0.54	0
	ALA	308	-	-	-	-0.62	0.29	0	-0.62	0.29	0
	PHE	309	-	-	-	-0.77	0.26	0	-0.77	0.26	0
	VAL	310	-0.58	0.54	0	-1.43	0.67	0	-1.01	0.61	0
	ARG	311	-2.47	0.8	0.01	-1.21	0.54	0	-1.84	0.67	0.01
	MET	312	-2.08	0.98	0.01	-0.52	0.7	0	-1.3	0.84	0.01
	ASP	313	1.1	1.15	0.01	-	-	-	1.1	1.15	0.01
	GLY	318	-	-	-	-1.55	0.6	0	-1.55	0.6	0
	ILE	319	-0.79	0.35	0	-2.23	0.47	0	-1.51	0.41	0
	GLY	320	-3.5	0.68	0	-5.75	0.88	0.01	-4.63	0.78	0.01
	LEU	321	-1.43	0.45	0	-2.96	0.9	0.01	-2.2	0.68	0.01
	GLY	322	-3.54	0.63	0	-1.54	0.89	0.01	-2.54	0.76	0.01
	LEU	323	-1.5	0.72	0.01	-	-	-	-1.5	0.72	0.01
	ATP	366	-15.26	3.35	0.02	-19.95	4.68	0.03	-17.61	4.02	0.03
Pseudomonas aeruginosa	ASN	363	-6.09	1.89	0.01	-6.1	1.65	0.01	-6.1	1.77	0.01
	ARG	366	-0.58	0.86	0.01	-	-	-	-0.58	0.86	0.01
	TYR	367	-1.75	0.9	0.01	-1.73	0.77	0.01	-1.74	0.84	0.01
	ASP	391	4.61	1.01	0.01	4.67	1.02	0.01	4.64	1.02	0.01
	GLY	393	-0.52	0.11	0	-0.51	0.11	0	-0.52	0.11	0
	PRO	394	-	-	-	-0.52	0.19	0	-0.52	0.19	0
	VAL	396	-0.68	0.29	0	-0.63	0.27	0	-0.66	0.28	0
	GLU	400	1.12	0.86	0.01	1.01	0.6	0	1.07	0.73	0.01
	ILE	404	-0.9	0.35	0	-0.88	0.36	0	-0.89	0.36	0
	TYR	409	-1.01	0.7	0	-0.72	0.49	0	-0.87	0.6	0
	ARG	410	-1.14	0.8	0.01	-2.36	2.39	0.02	-1.75	1.6	0.02
	SER	411	-0.64	0.46	0	-	-	-	-0.64	0.46	0
	GLY	419	-0.9	0.43	0	-0.79	0.4	0	-0.85	0.42	0
	SER	420	-0.91	0.5	0	-0.72	0.37	0	-0.82	0.44	0
	GLY	421	-2.66	0.69	0	-2.6	0.94	0.01	-2.63	0.82	0.01
	LEU	422	-2.26	0.89	0.01	-1.81	0.85	0.01	-2.04	0.87	0.01
	GLY	423	-3.4	0.7	0	-3.12	1.05	0.01	-3.26	0.88	0.01
	LEU	424	-2.76	0.56	0	-2.84	0.56	0	-2.8	0.56	0
	GLY	448	-0.58	0.12	0	-0.59	0.11	0	-0.59	0.12	0
	LEU	449	-0.7	0.28	0	-0.79	0.26	0	-0.75	0.27	0
	ATP	478	-5.81	3.86	0.03	-4.95	3.24	0.02	-5.38	3.55	0.03
∆G, average of energy change upon binding; SD, standard deviation; SEM, standard error of mean.
